# Supplementary material
Source: PubMed Central journal article supplement (PMC3256634)
Supplement: supp_194.2.376_DocumentS1.pdf [file supp_194.2.376_DocumentS1.pdf]

[Document S1](#). Supporting evidence for the REIS assembly. This supplement marshals evidence that our assembly is accurate and comes from a single endosymbiont with a uniform phylogenetic placement within *Rickettsia*. (A) Brief background information regarding the Wikel tick colony and the nature of transovarial transmission of spotted fever group rickettsiae. (B-E) Analyses of 16S rDNA sequences and of 18 combined proteins encoding the *rvh* T4SS, demonstrating that diverse gene sets consistently support REIS as a basal member of the SFG group, yet with high similarity to previously identified endosymbionts whose genome sequences are not yet available. (F-H) Analysis of 1499 REIS proteins with top BLASTP hits to proteins encoded in other *Rickettsia* genomes and 742 REIS proteins with top BLASTP hits to proteins encoded in non-*Rickettsia* genomes, showing that nearly all proteins have congruent phylogenies such that the assembly has not likely included accidental fragments from other organisms. Note: more descriptive legends follow the figures.

## A

*The Wikel Ixodes scapularis colony.* Established by Dr. Stephen Wikel (Quinnipiac University School of Medicine) in 1996, the *I. scapularis* Wikel colony was seeded with approximately 30 pairs of field collected adult male and female ticks from populations in New York, Oklahoma and a Lyme disease endemic area of Connecticut. By 2004 (the time of genome sequencing), the colony had been continuously in-bred for approximately 12 generations, limiting the degree of polymorphism typical of *I. scapularis* natural populations with normal levels of gene flow (8). Importantly, since its establishment, the Wikel colony has not been supplemented with field-collected material, and is very carefully maintained. Exposure of the colony to known denizens of *I. scapularis* (several of which are pathogens), including *Babesia*, *Borrelia*, *Bartonella*, *Anaplasma*, and flavivirus, has not been detected, with ticks being maintained on laboratory animals (pathogen-free blood sources). Furthermore, prior to genomic DNA extraction, the ticks were surface sterilized to eliminate microbial contamination. Thus, because of its age, inbred nature and careful maintenance, the only likely microorganisms residing within the Wikel colony are those associated with transovarial transmission.

*Transovarial transmission of rickettsiae.* Transovarial transmission in some arthropod vectors entails the transfer of bacteria from parent arthropod directly to offspring arthropod via the ovaries. This mode of transmission is characteristic of many rickettsial species, especially spotted fever group (SFG) rickettsiae, wherein single bacterial species are maintained in their arthropod hosts through generations, with the competitive exclusion of congeners (a mechanism that remains poorly understood) (1-7). Thus, the detection of a SFG rickettsial symbiont in the *I. scapularis* genome assembly is not surprising. From the initial analysis of the preliminary *I. scapularis* assembly, it was determined that a single bacterial species was likely present (based on 16S rDNA analysis). Any non-rickettsial bacteria present in the field-collected *I. scapularis* individuals that seeded the Wikel colony would not have persisted in subsequent generations because they are disseminated only by transstadial transmission or acquired via horizontal transmission from infected blood sources. Furthermore, due to the exclusion principal of transovarial transmission, multiple

rickettsial species (or subspecies) would have culminated in one endosymbiont that continually propagated through the ensuing *I. scapularis* generations. Thus, such possibilities are null considering 12 generations of laboratory maintenance.

In summary, the dynamics of tick-borne SFG rickettsiae transmission, coupled with the history and maintenance of the Wikel colony, lead us to believe that a single rickettsial species is present in the *I. scapularis* genome assembly.

1. **Burgdorfer, W.** 1989. Ecological and Epidemiological considerations of Rocky Mountain spotted fever and scrub typhus, p. 34-47. *In* D. H. Walker (ed.), *Biology of Rickettsial Diseases*, vol. 1. , vol. 1. CRC Press, Boca Raton, FL.
2. **Burgdorfer, W.** 1975. A review of Rocky Mountain spotted fever (tick-borne typhus), its agent, and its tick vectors in the United States. *J Med Entomol* **12**:269-278.
3. **Burgdorfer, W., S. F. Hayes, and M. A. J.** 1981. Nonpathogenic rickettsiae in *Dermacentor andersoni*: a limiting factor for *Rickettsia rickettsii*, p. 585-594. *In* W. Burgdorfer and R. L. Anacker (ed.), *Rickettsiae and Rickettsial Diseases*. Academic Press, New York, NY.
4. **Hayes, S. F., and W. Burgdorfer.** 1990. Interactions between rickettsial endocytobionts and their tick hosts. . *In* S. A. Gossner (ed.), *Insect Endocytobiosis: Morphology, Physiology, Genetics, Evolution*. CRC PRes, Boca Raton, FL.
5. **Macaluso, K. R., A. Mulenga, J. A. Simser, and A. F. Azad.** 2003. Differential expression of genes in uninfected and rickettsia-infected *Dermacentor variabilis* ticks as assessed by differential-display PCR. *Infect Immun* **71**:6165-6170.
6. **Macaluso, K. R., D. E. Sonenshine, S. M. Ceraul, and A. F. Azad.** 2001. Infection and transovarial transmission of rickettsiae in *Dermacentor variabilis* ticks acquired by artificial feeding. *Vector Borne Zoonotic Dis* **1**:45-53.
7. **Macaluso, K. R., D. E. Sonenshine, S. M. Ceraul, and A. F. Azad.** 2002. Rickettsial infection in *Dermacentor variabilis* (Acari: Ixodidae) inhibits transovarial transmission of a second *Rickettsia*. *J Med Entomol* **39**:809-813.
8. **Pagel Van Zee, J., N. S. Geraci, F. D. Guerrero, S. K. Wikel, J. J. Stuart, V. M. Nene, and C. A. Hill.** 2007. Tick genomics: the *Ixodes* genome project and beyond. *Int J Parasitol* **37**:1297-1305.

# B

| Accession   | Description                                    | Max score | Tot. score | Query coverage | E value | Max ident |
|-------------|------------------------------------------------|-----------|------------|----------------|---------|-----------|
| D84558.1    | Rickettsia sp. (Ixodes scapularis symbiont)    | 2617      | 2617       | 100%           | 0       | 99%       |
| DQ100164.1  | Rickettsia monacensis strain IrR/Munich        | 2591      | 2591       | 100%           | 0       | 99%       |
| AF141908.1  | Rickettsia sp. IRS4                            | 2586      | 2586       | 100%           | 0       | 99%       |
| AF141907.1  | Rickettsia sp. IRS3                            | 2580      | 2580       | 100%           | 0       | 99%       |
| NR_042727.1 | Rickettsia tamurae strain AT-1                 | 2564      | 2564       | 100%           | 0       | 99%       |
| EU072493.1  | Uncultured Rickettsia sp. clone 11122          | 2564      | 2564       | 100%           | 0       | 99%       |
| DQ365809.1  | Rickettsia raoultii strain Marne               | 2564      | 2564       | 100%           | 0       | 99%       |
| L36102.1    | Rickettsia sp. (16S rRNA) gene                 | 2564      | 2564       | 100%           | 0       | 99%       |
| AF120026.1  | Rickettsia sp. RpA4 strain RpA4                | 2556      | 2556       | 99%            | 0       | 99%       |
| CP000683.1  | Rickettsia massiliae MTU5,                     | 2558      | 2558       | 100%           | 0       | 99%       |
| NR_025919.1 | Rickettsia massiliae strain Mtu1               | 2558      | 2558       | 100%           | 0       | 99%       |
| L36106.1    | Rickettsia massiliae (16S rRNA) gene           | 2558      | 2558       | 100%           | 0       | 99%       |
| EU036982.1  | Rickettsia raoultii strain Elanda-23/95        | 2551      | 2551       | 99%            | 0       | 99%       |
| AF120024.1  | Rickettsia sp. DnS28 strain DnS28              | 2551      | 2551       | 99%            | 0       | 99%       |
| EF589609.1  | Rickettsia sp. TwKM01                          | 2553      | 2553       | 100%           | 0       | 99%       |
| NR_043755.1 | Rickettsia raoultii strain Khabarovsk          | 2553      | 2553       | 100%           | 0       | 99%       |
| L36224.1    | Rickettsia slovacica (strain 13-B)             | 2553      | 2553       | 100%           | 0       | 99%       |
| NR_025921.1 | Rickettsia rhipicephali strain 3-7-6           | 2553      | 2553       | 100%           | 0       | 99%       |
| AF120025.1  | Rickettsia sp. DnS14 strain DnS14              | 2545      | 2545       | 99%            | 0       | 99%       |
| AB604667.1  | Rickettsia endosymbiont (Curculio hilgendorfi) | 2534      | 2534       | 99%            | 0       | 99%       |
| AB604665.1  | Rickettsia endosymbiont (Curculio camelliae)   | 2534      | 2534       | 99%            | 0       | 99%       |
| L28944.1    | Rickettsia sp. 16S ribosomal DNA sequence      | 2529      | 2529       | 99%            | 0       | 99%       |
| AP011533.1  | Rickettsia japonica YH DNA,                    | 2547      | 2547       | 100%           | 0       | 99%       |
| CP000766.2  | Rickettsia rickettsii str. Iowa,               | 2547      | 2547       | 100%           | 0       | 99%       |
| CP001227.1  | Rickettsia peacockii str. Rustic               | 2547      | 2547       | 100%           | 0       | 99%       |
| AE006914.1  | Rickettsia conorii str. Malish 7               | 2547      | 2547       | 100%           | 0       | 99%       |
| CP000848.1  | Rickettsia rickettsii str. 'Sheila Smith'      | 2547      | 2547       | 100%           | 0       | 99%       |
| EF589608.1  | Rickettsia sp. IG-1                            | 2547      | 2547       | 100%           | 0       | 99%       |
| CP000053.1  | Rickettsia felis URRWXCa2                      | 2547      | 2547       | 100%           | 0       | 99%       |
| AF394903.1  | Rickettsia sp. FLA1                            | 2547      | 2547       | 100%           | 0       | 99%       |
| DQ062433.1  | Rickettsia peacockii                           | 2547      | 2547       | 100%           | 0       | 99%       |
| L36220.1    | Rickettsia sp. (strain TT-118)                 | 2547      | 2547       | 100%           | 0       | 99%       |
| L36213.1    | Rickettsia japonica (strain YM)                | 2547      | 2547       | 100%           | 0       | 99%       |
| L36107.1    | Rickettsia conorii                             | 2547      | 2547       | 100%           | 0       | 99%       |
| U12460.1    | Rickettsia conorii ITT-597                     | 2547      | 2547       | 100%           | 0       | 99%       |
| U11021.1    | Rickettsia rickettsii                          | 2547      | 2547       | 100%           | 0       | 99%       |
| NR_041934.1 | Rickettsia conorii strain Malish 7             | 2542      | 2542       | 99%            | 0       | 99%       |
| L36105.1    | Rickettsia conorii                             | 2542      | 2542       | 99%            | 0       | 99%       |

# C

>dbj|D84558.1|IXORDNAA Rickettsia sp. (Ixodes scapularis symbiont) gene for 16S rRNA, partial sequence  
Length=1420

Score = 2617 bits (1417), Expect = 0.0  
Identities = 1420/1421 (99%), Gaps = 1/1421 (0%)  
Strand=Plus/Plus

|               |     |                                                             |     |
|---------------|-----|-------------------------------------------------------------|-----|
| <b>REIS</b>   | 181 | GGATGAGCCCGCTCAGATTAGGTCGTTGGTGAGGTAACGGCTACCAAGCCGACGATCT  | 240 |
|               |     |                                                             |     |
| <b>D84558</b> | 181 | GGATGAGCCCGCTCAGATTAGGTCGTTGGTGAGGTAACGGCTACCAAGCCGACGATCT  | 240 |
| <b>REIS</b>   | 241 | GTAGCTGGTCTGAGAGGATGATCAGCCACACTGGGACTGAGACACGGCCAGACTCTAC  | 300 |
|               |     |                                                             |     |
| <b>D84558</b> | 241 | GTAGCTGGTCTGAGAGGATGATCAGCCACACTGGGACTGAGACACGGCCAGACTCTAC  | 299 |
|               |     |                                                             |     |
|               |     | *                                                           |     |
| <b>REIS</b>   | 301 | GGGAGGCAGCAGTGGGGAATATTGGACAATGGGCGAAGCCTGATCCAGCAATACCGAGT | 360 |
|               |     |                                                             |     |
| <b>D84558</b> | 300 | GGGAGGCAGCAGTGGGGAATATTGGACAATGGGCGAAGCCTGATCCAGCAATACCGAGT | 359 |

(B) Blastn hits using REIS 16S rDNA sequence as query (retrieved from PATRIC, VBIRicEnd40569\_r031). Only subjects scoring a maximum identity of 99% are listed. NOTE: 36 nts from the 5'-end and 51 nts from the 3'-end of the sequence were trimmed to target the region predominantly sequenced by rickettsial researchers (using the entire REIS gene inflates similarity statistics shared with full length 16S rDNA sequences from complete genome sequencing projects). The top hit to the 16S rDNA sequence from a rickettsial endosymbiont of *I. scapularis* (GenBank accession no. D84558) is highlighted.

(C) Blastn information and partial region showing the single difference between the REIS and D84558 16S rDNA sequences. Note: the next closest sequence to the REIS 16S rDNA is from *R. monacensis* str. IrR/Munich (DQ100164), which is known from European ixodid ticks (particularly *I. ricinus*).

D

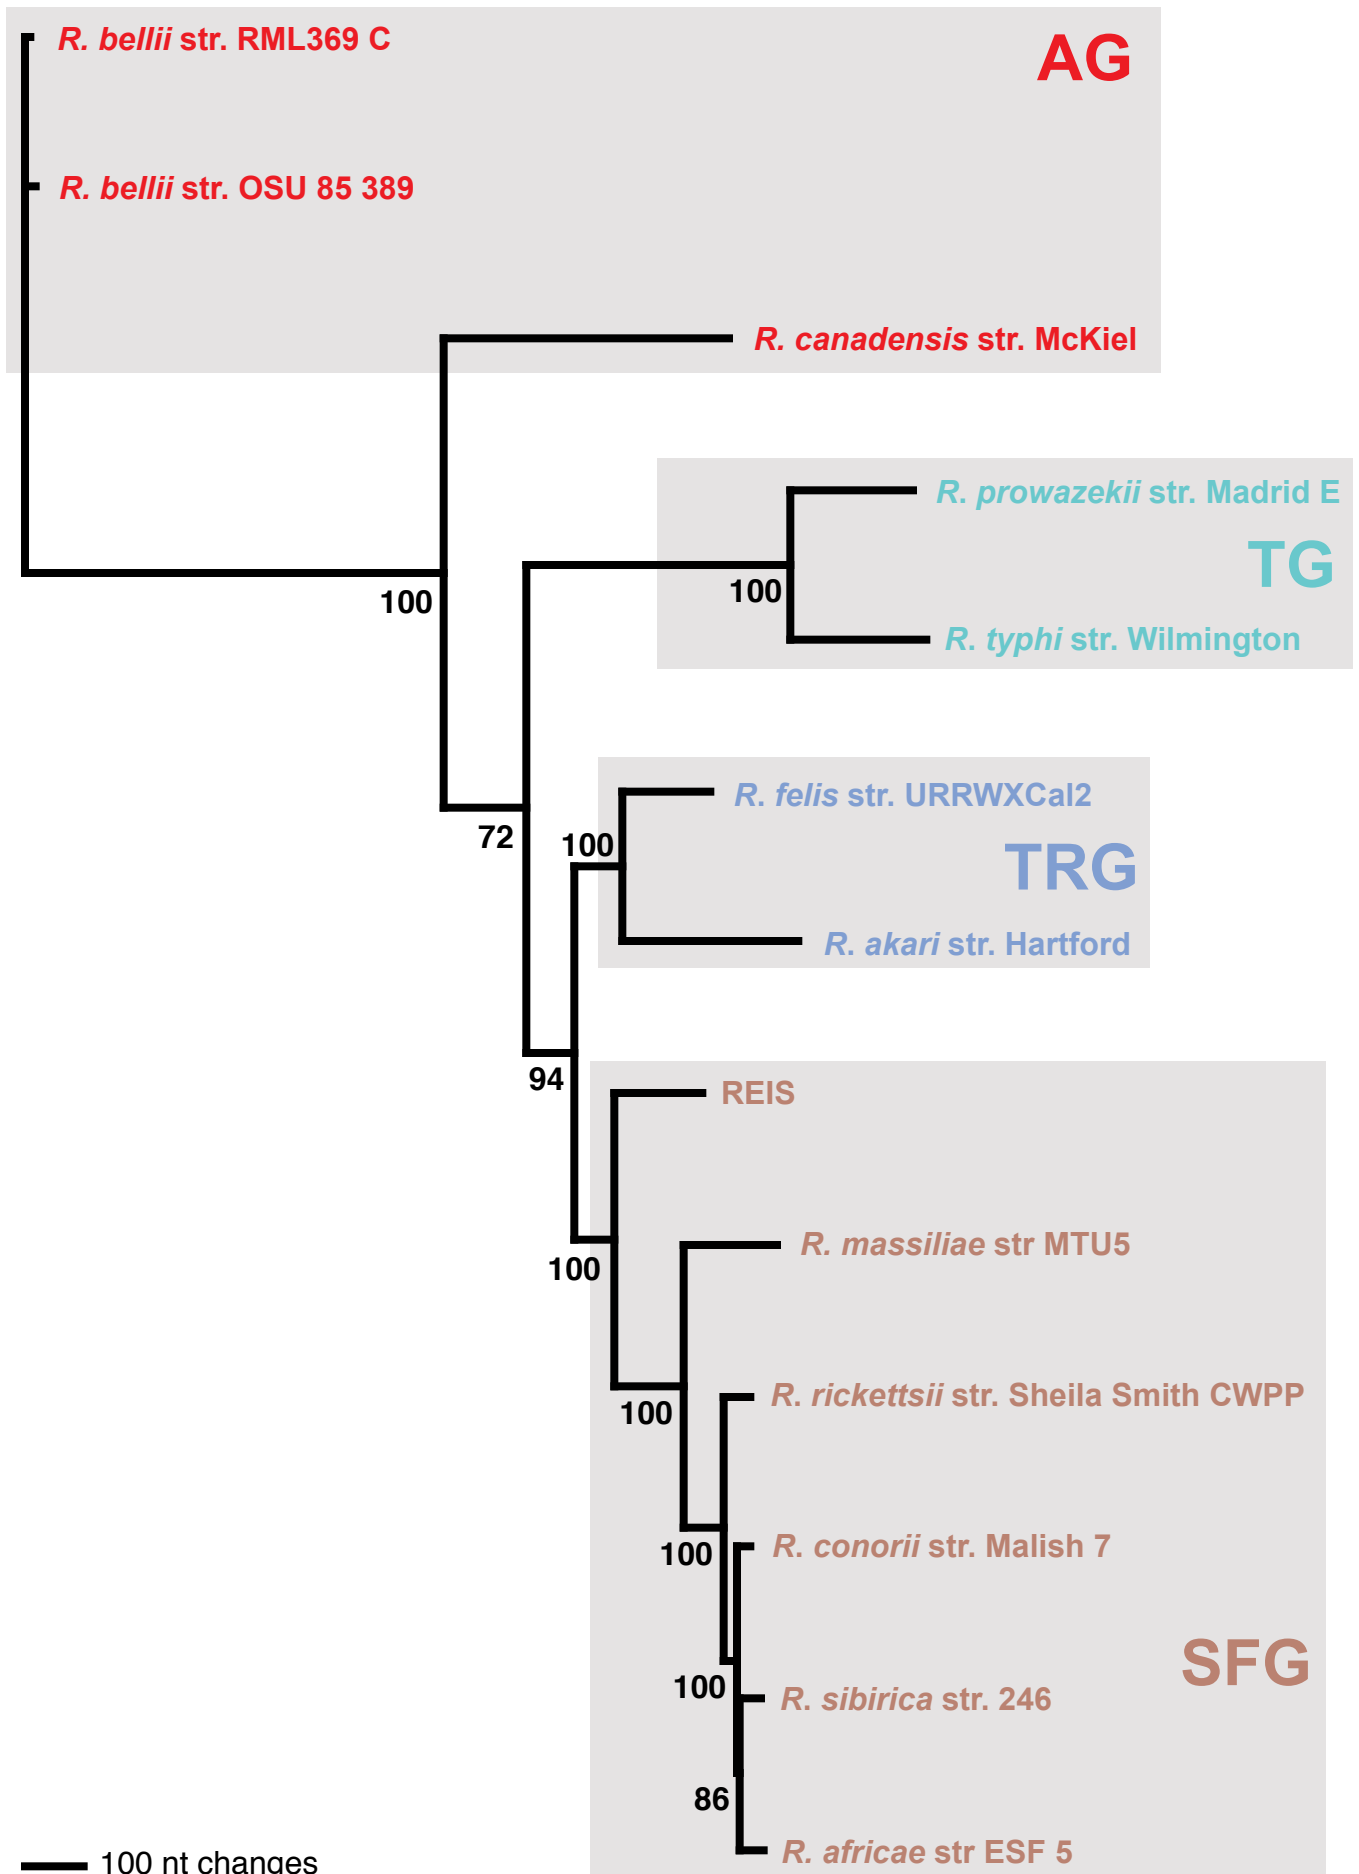

(D) Phylogeny estimation of rickettsial 16S rDNA sequences, illustrating that REIS is indeed a well-diverged lineage in relation to the other *Rickettsia* spp. with an available complete genome sequence. Note: this estimated phylogeny is consistent with the species tree shown in Fig. 3 of the manuscript.

E

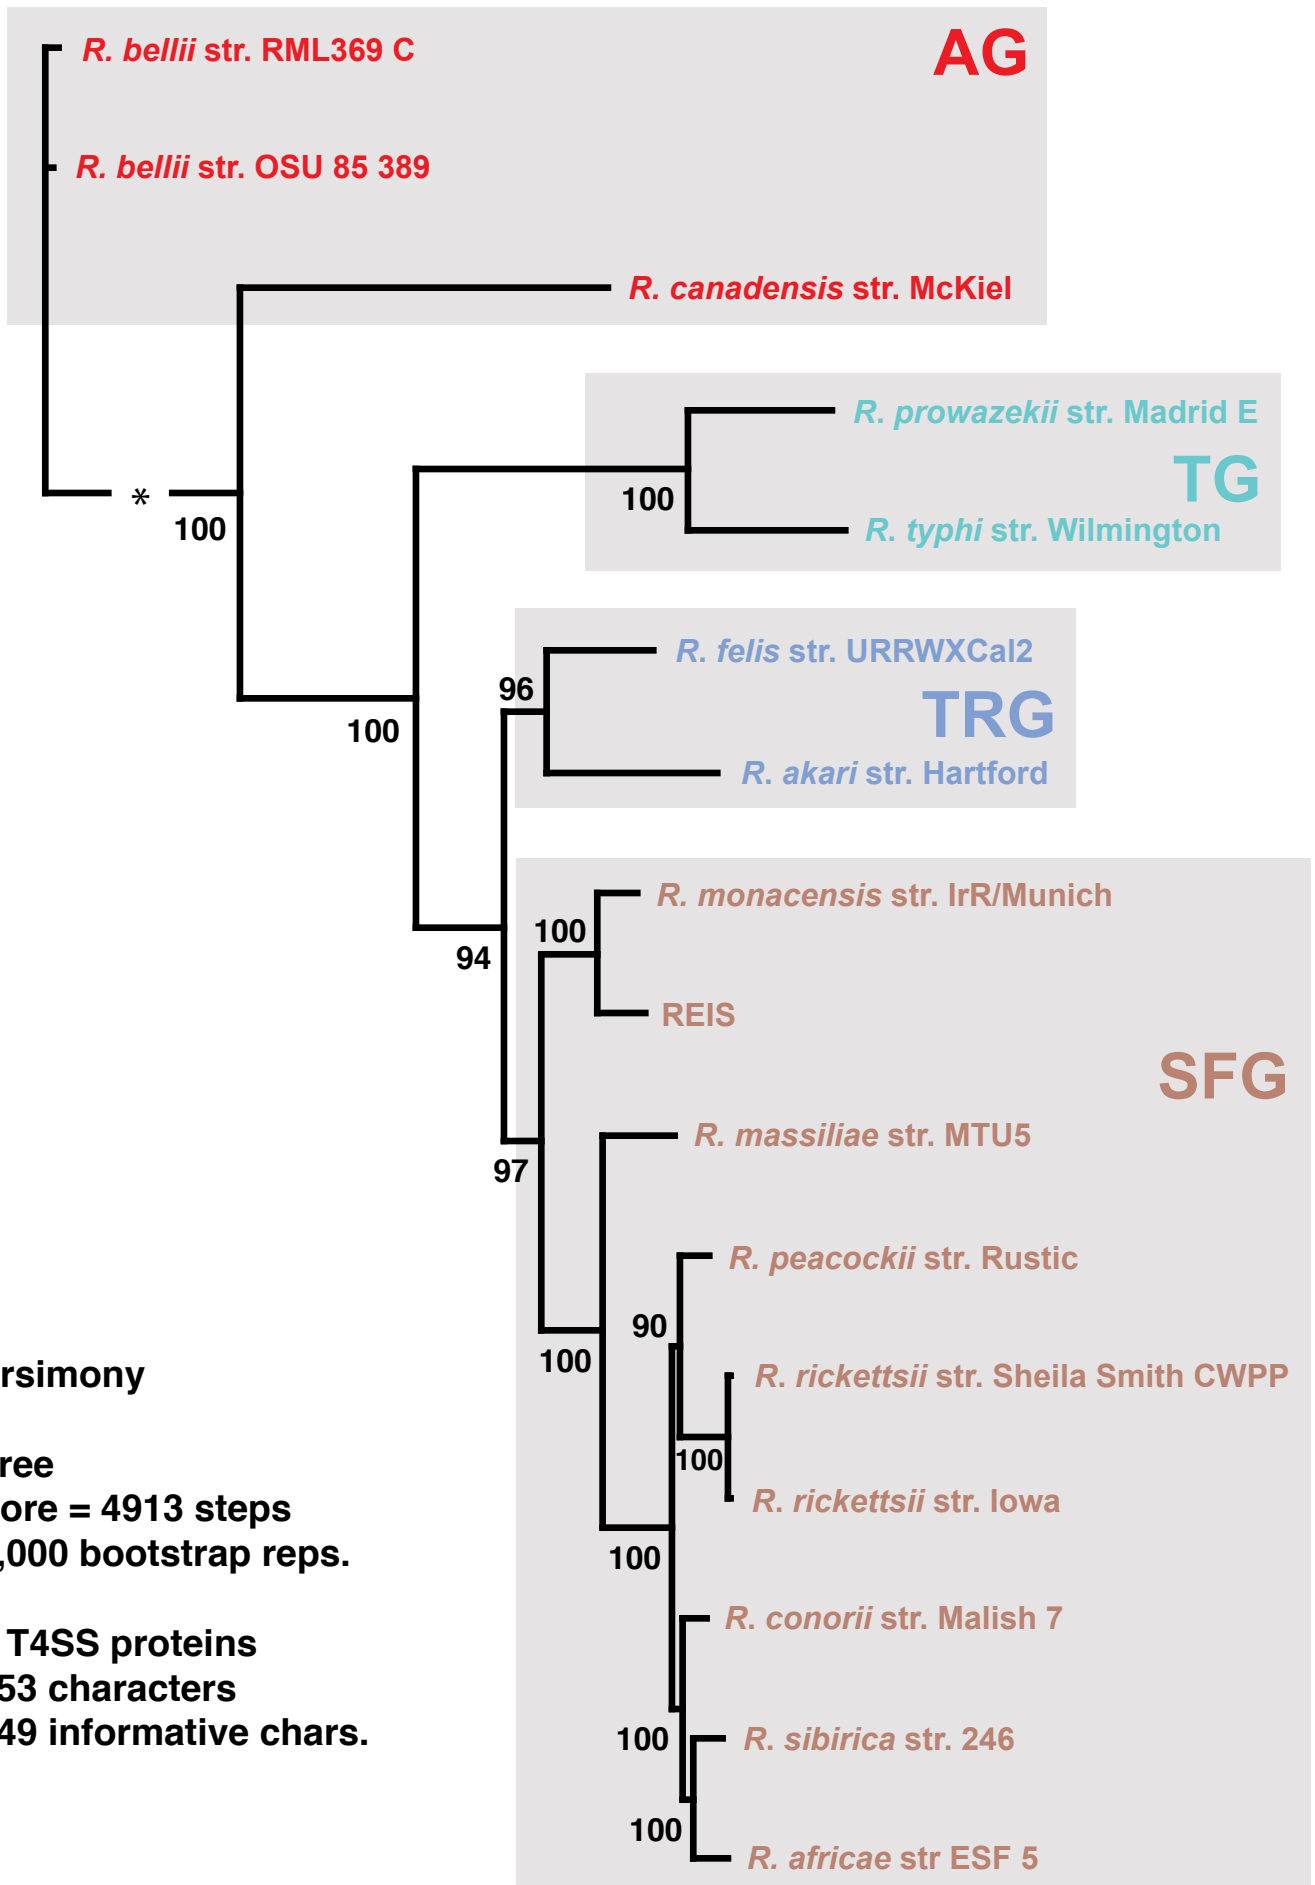

**Parsimony**

1 tree

Score = 4913 steps

10,000 bootstrap reps.

18 T4SS proteins

9453 characters

2249 informative chars.

— 100 changes

\* = —————



(E) Phylogeny estimation of 18 proteins encoding the *rvh* T4SS with the inclusion of unpublished sequences from *R. monacensis* str. IrR/Munich (courtesy of Ulrike Munderloh and Tim Kurtti, U. of Minnesota). REIS and *R. monacensis* str. IrR/Munich form a monophyletic group, but with each lineage well diverged from their common ancestor (>50 aa differences across 18 proteins).

F

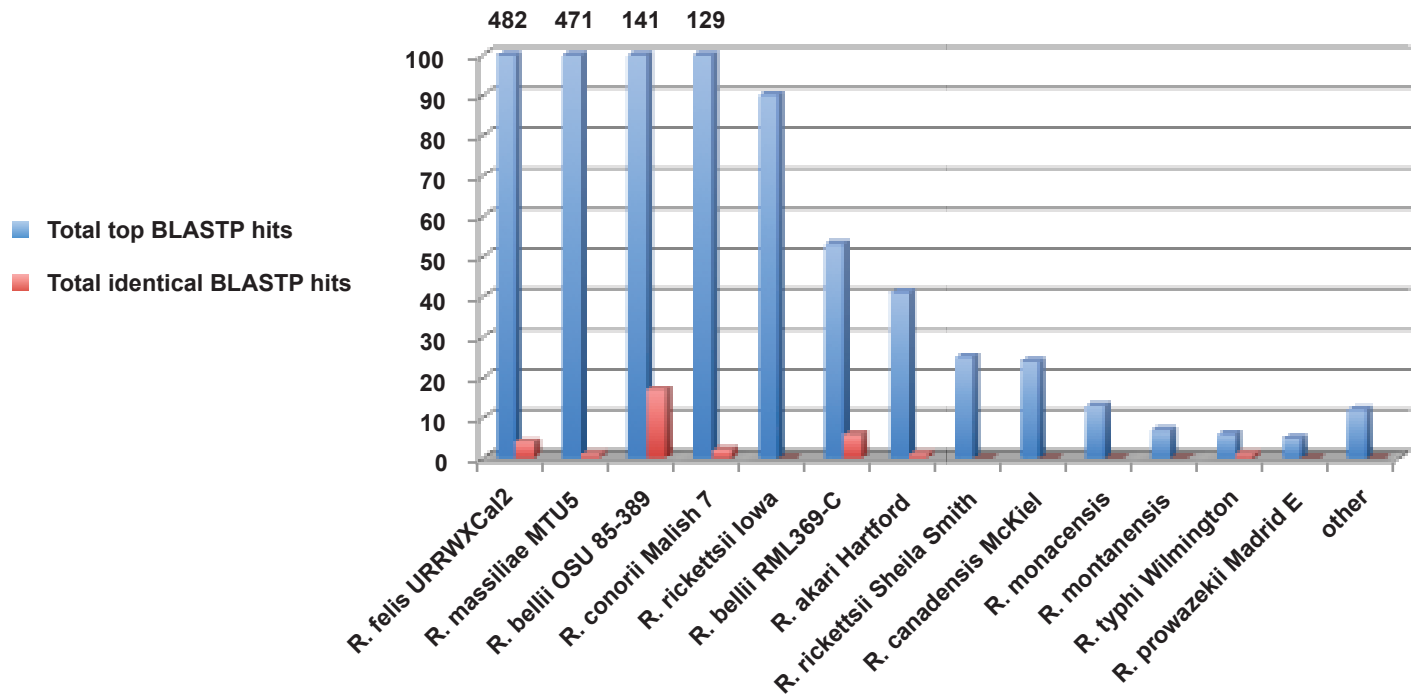

G

| REIS no. | L (aa) | Genome |    |    |    |    |    |    |    |    |    |    |    |    |    |
|----------|--------|--------|----|----|----|----|----|----|----|----|----|----|----|----|----|
|          |        | Br     | Bo | Ca | Pr | Ty | Fe | Ak | Ma | Pe | Ri | Rw | Co | Si | Af |
| 116      | 86     | 62     | 58 | 99 | 99 | 99 | ID | 94 | ID | 98 | 99 | 99 | ID | ID | ID |
| 197      | 71     | 93     | 93 | 97 | 99 | ID | 99 | 97 | 97 | 99 | 99 | 99 | 99 | 97 | 99 |
| 591      | 97     | 87     | 87 | 94 | 86 | 82 | 99 | 98 | ID | 99 | 99 | 99 | ID | ID | ID |
| 841      | 388    | ID     | ID |    |    |    |    |    | 90 |    |    |    |    |    |    |
| 842      | 594    | ID     | 99 |    |    |    |    |    |    | 94 |    |    |    |    |    |
| 843      | 55     | ID     | ID |    |    |    |    |    |    |    |    |    |    |    |    |
| 844      | 102    | ID     | ID |    |    |    |    |    | 93 | 92 |    |    |    |    |    |
| 845      | 183    | ID     | ID |    |    |    |    |    | 98 | 93 |    |    |    |    |    |
| 846      | 148    | ID     | ID |    |    |    |    |    | 91 | 92 |    |    |    |    |    |
| 848      | 472    | 99     | ID |    |    |    |    |    | 90 | 89 |    |    |    |    |    |
| 849      | 84     | ID     | ID |    |    |    |    |    | 92 |    |    |    |    |    |    |
| 852      | 68     | ID     | ID |    |    |    |    |    |    |    |    |    |    |    |    |
| 853      | 322    | ID     | ID |    |    |    |    |    | 91 |    |    |    |    |    |    |
| 854      | 144    | ID     | ID |    |    |    |    |    | 70 |    |    |    |    |    |    |
| 856      | 277    | 99     | ID |    |    |    |    |    | 79 |    |    |    |    |    |    |
| 857      | 444    | ID     | ID |    |    |    |    |    | 89 |    |    |    |    |    |    |
| 858      | 905    | ID     | ID |    |    |    |    |    | 91 |    |    |    |    |    |    |
| 859      | 397    | ID     | ID |    |    |    |    |    | 65 |    |    |    |    |    |    |
| 860      | 562    | ID     | ID |    |    |    |    |    | 92 |    |    |    |    |    |    |
| 863      | 97     | ID     | ID | 76 |    |    | 44 |    | 70 |    |    |    |    |    |    |
| 864      | 215    | ID     | ID |    |    |    |    |    |    |    |    |    |    |    |    |
| 865      | 48     | ID     | ID |    |    |    |    |    |    |    |    |    |    |    |    |
| 867      | 248    | ID     | ID |    |    |    |    |    | 70 |    |    |    |    |    |    |
| 868      | 316    | ID     | ID |    |    |    |    |    | 48 |    |    |    |    |    |    |
| 871      | 569    | ID     | ID |    |    |    |    |    |    |    |    |    |    |    | 74 |
| 918      | 68     | ID     | ID |    |    |    |    |    | 76 |    |    |    |    |    |    |
| 1114     | 87     | 80     | 79 | 91 | 91 | 87 | 99 | 90 | ID | 98 | 98 | 98 | 95 | 98 | 98 |
| 1328     | 475    | 94     | 94 | 98 | 95 | 95 | ID | 98 | 99 | 99 | 99 | 99 | 98 | 99 | 98 |
| 1832     | 127    | 92     | 92 | 98 | 98 | 98 | ID | 98 | 99 | ID | 99 | 99 | 99 | 99 | 99 |
| 1845     | 122    | 98     | 98 | 99 | 98 | 98 | ID | 98 | 98 | 98 | 98 | 98 | 98 | 98 | 98 |
| 1899     | 78     | 94     | 88 | 95 | 91 | 90 | ID | 99 | ID | ID | 99 | 99 | ID | ID | ID |

(F) Distribution across other *Rickettsia* genomes of REIS proteins with top BLASTP hits to *Rickettsia* proteins. For each genome, the total number of top BLASTP hits (blue) and total number of identical BLASTP hits (red) is shown. 'Other' includes the following: *R. raoultii* (3 proteins), *R. helvetica* (2), *R. rhipicephali* (2), *R. africae* (1), *R. australis* (1), rickettsial endosymbiont of *Ixodes scapularis* (1), *Rickettsia* sp. IRS 4 (1), *R. parkeri* (1).

(G) REIS proteins identical to proteins in other *Rickettsia* genomes, and the distribution of these proteins across the other *Rickettsia* genomes. ID (highlighted yellow), identical. All other numbers depict maximum sequence identity determined from BLASTP analysis. Black cells depict absence of significant homolog or presence of distant paralog. The pink shading depicts the proteins encoded within the RAGE-Be, which is highly similar across REIS and *R. bellii* genomes (see manuscript text for details). Annotation for the 31 REIS proteins as follows: [REIS\\_0116](#), acyl carrier protein; [REIS\\_0197](#), translation initiation factor IF-1; [REIS\\_0591](#), 50S ribosomal protein L28; [REIS\\_0841](#), integrase; [REIS\\_0842](#), leucine rich repeat domain protein; [REIS\\_0843](#), conserved hypothetical protein; [REIS\\_0844](#), conserved hypothetical protein; [REIS\\_0845](#), conjugative transfer protein TraE; [REIS\\_0846](#), conserved hypothetical protein; [REIS\\_0848](#), F pilus assembly protein TraB; [REIS\\_0849](#), conjugative transfer protein TraV; [REIS\\_0852](#), prevent-host-death family protein; [REIS\\_0853](#), conjugal DNA transfer protein TraU; [REIS\\_0854](#), conjugative transfer protein TrbC; [REIS\\_0856](#), F pilus assembly protein TraF; [REIS\\_0857](#), F pilus assembly protein TraH; [REIS\\_0858](#), conjugative transfer protein TraG; [REIS\\_0859](#), tetratricopeptide repeat-containing protein; [REIS\\_0860](#), putative conjugative transfer protein TraD; [REIS\\_0863](#), conjugal transfer protein TraD; [REIS\\_0864](#), guanosine polyphosphate pyrophosphohydrolase/synthetase; [REIS\\_0865](#), conserved hypothetical protein; [REIS\\_0867](#), guanosine polyphosphate pyrophosphohydrolase/synthetase; [REIS\\_0868](#), signal transduction histidine kinase; [REIS\\_0871](#), conserved hypothetical protein; [REIS\\_0918](#), prevent-host-death family protein; [REIS\\_1114](#), tetratricopeptide repeat-containing protein; [REIS\\_1328](#), RNA pyrophosphohydrolase; [REIS\\_1832](#), 30S ribosomal protein S11; [REIS\\_1845](#), ribosomal protein L14; [REIS\\_1899](#), conserved domain protein.

H

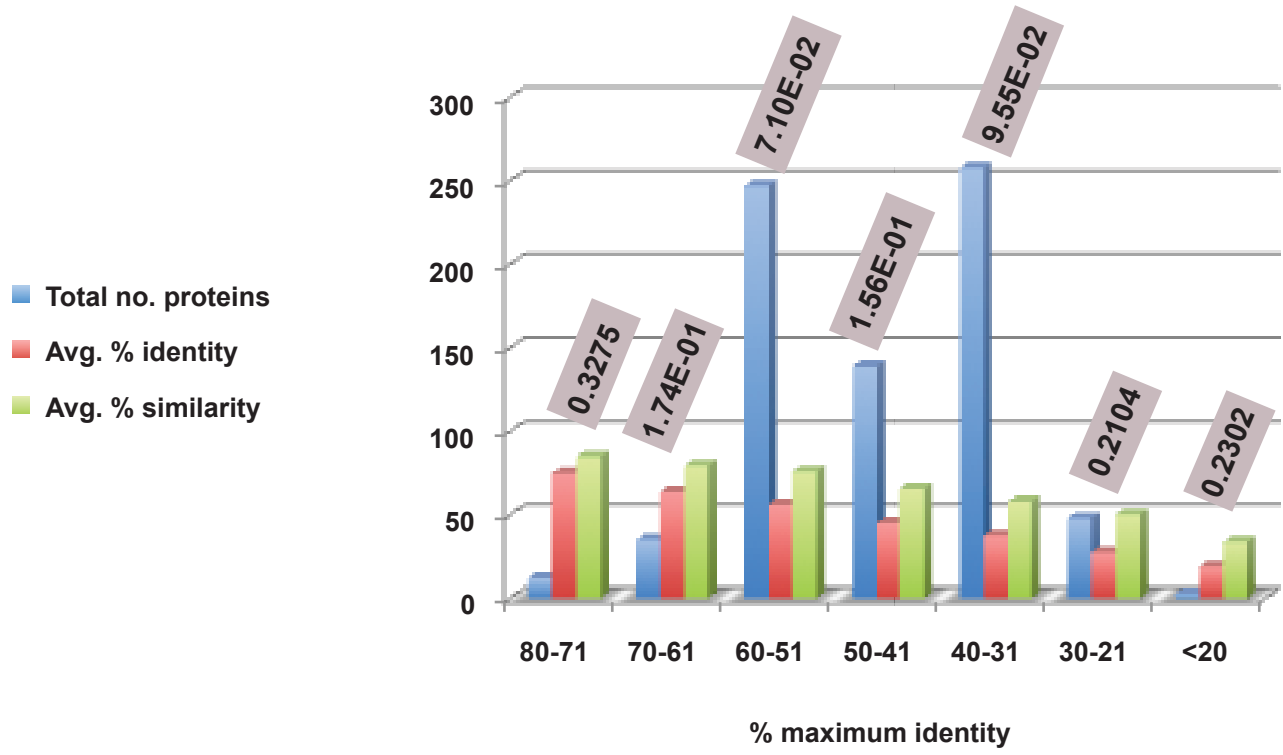

(H) Analysis of 742 REIS proteins with top BLASTP hits to proteins encoded in non-*Rickettsia* genomes. The BLASTP results were ranked according to maximum identity scores (%), and plotted in intervals of ten (x-axis). Note: no REIS proteins were identical to any proteins from non-*Rickettsia* organisms, with the highest identity score equal to 80%. For each interval of maximum identity the total number of proteins (blue), average percent identity (red) and average percent similarity (green) are shown. Values within gray boxes above each interval depict the average E-value across the total comparisons per interval.
