# Supplementary material
Source: PubMed Central journal article supplement (PMC3256634)
Supplement: supp_194.2.376_FigS1-S7.pdf [file supp_194.2.376_FigS1-S7.pdf]

**Fig. S1.** Synteny analysis of 16 *Rickettsia* spp. genomes. The following genomes were included in all or some of the analyses: Br = *R. bellii* str. RML369-C (NC\_007940), Bo = *R. bellii* str. OSU 85 389 (NZ\_AARC01000001), Ca = *R. canadensis* str. McKiel (NZ\_AAFF01000001), Ty = *R. typhi* str. Wilmington (NC\_006142), Pr = *R. prowazekii* str. Madrid E (NC\_000963), P22 = *R. prowazekii* str. P22 (CP001584), Fe = *R. felis* str. URRWXCal2 (NC\_007109), Ak = *R. akari* str. Hartford (NZ\_AAFE01000001), REIS = *Rickettsia* endosymbiont of *Ixodes scapularis*, Ma = *R. massilae* str. MTU5 (AAVR01000001), Pe = *R. peacockii* str. Rustic (NC\_012730), Ri = *R. rickettsii* str. Sheila Smith (NZ\_AADJ01000001), Rw = *R. rickettsii* str. Iowa (NC\_010263), Co = *R. conorii* str. Malish 7 (NC\_003103), Si = *R. sibirica* str. 246 (NZ\_AABW01000001), Af = *R. africae* str. ESF-5 (AAUY01000001). Genome sequence alignments were performed using Mauve v.2.3.1 [1]. Unmodified Fasta files for each rickettsial genome were used as input, except that the *R. sibirica* genome sequence was reindexed using the reverse-complement of its circular permutation from the original position 668301, as previously analyzed [2]. (A) Alignment of 16 *Rickettsia* spp. genome sequences. (B) Alignment of 15 *Rickettsia* spp. genome sequences (excluding Pe). (C) Alignment of 15 *Rickettsia* spp. genome sequences (excluding Pe, switching positions of REIS and Ma). (D) Alignment of 14 *Rickettsia* spp. genome sequences (excluding Fe and Pe).

1. Darling, A.E., B. Mau, and N.T. Perna, *progressiveMauve: multiple genome alignment with gene gain, loss and rearrangement*. PLoS One, 2010. **5**(6): p. e11147.
2. Gillespie, J.J., et al., *Rickettsia Phylogenomics: Unwinding the Intricacies of Obligate Intracellular Life*. PLoS ONE, 2008. **3**(4): p. e2018.

**A**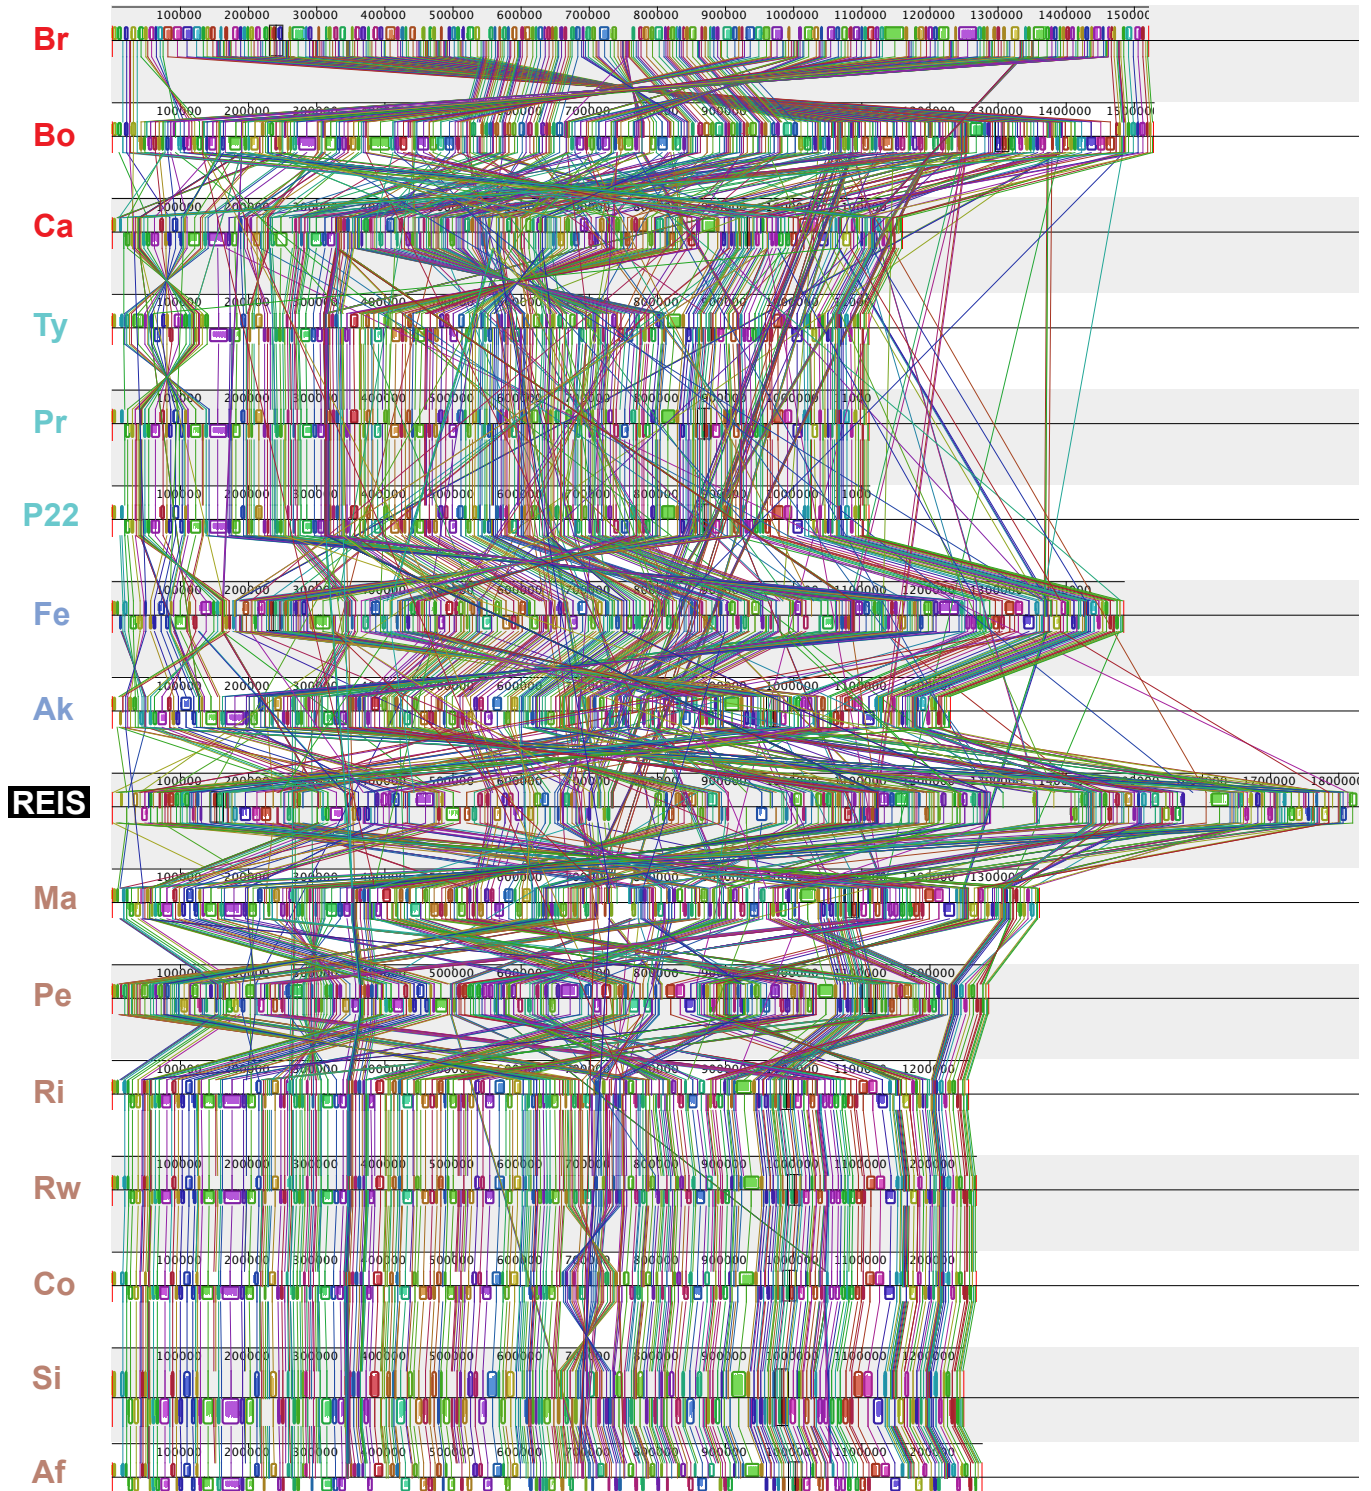

**Alignment of 16 *Rickettsia* spp. genome sequences. The taxa are arranged according to the species phylogeny. The *R. bellii* genomes differ from one another by one large rearrangement, and little synteny exists across either *R. bellii* genome and *R. canadensis* (Ca). Ca is highly conserved in synteny with TG rickettsiae. Of the remaining derived genomes, *R. felis* (Fe), REIS and *R. peacockii* (Pe) have genome rearrangements that perturb an otherwise highly conserved gene order. Further alignments (B-D) illustrate this with removal or repositioning of Fe, REIS and Pe.**

**B**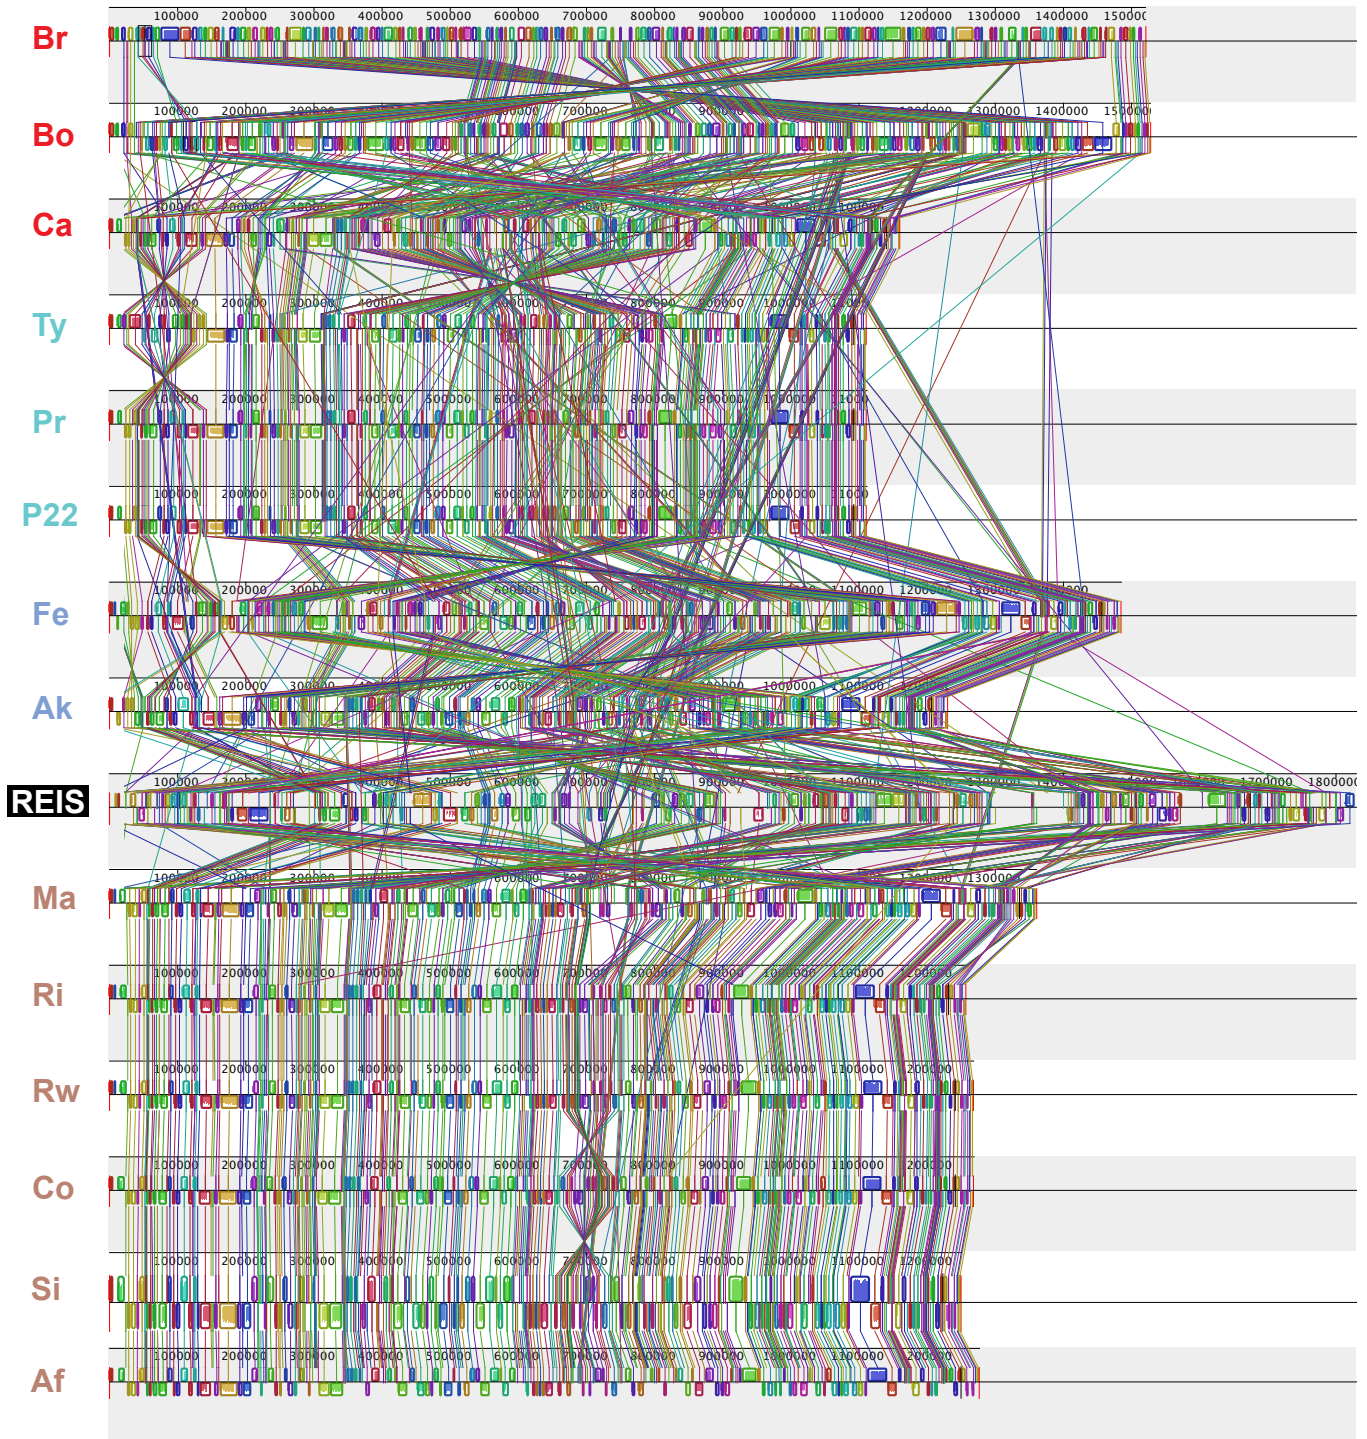

**Alignment of 15 *Rickettsia* spp. genome sequences. The taxa are arranged according to the species phylogeny. *R. peacockii* (Pe) was not included in this alignment, as to better demonstrate the lack of synteny between REIS and the derived SFG rickettsiae.**

**C**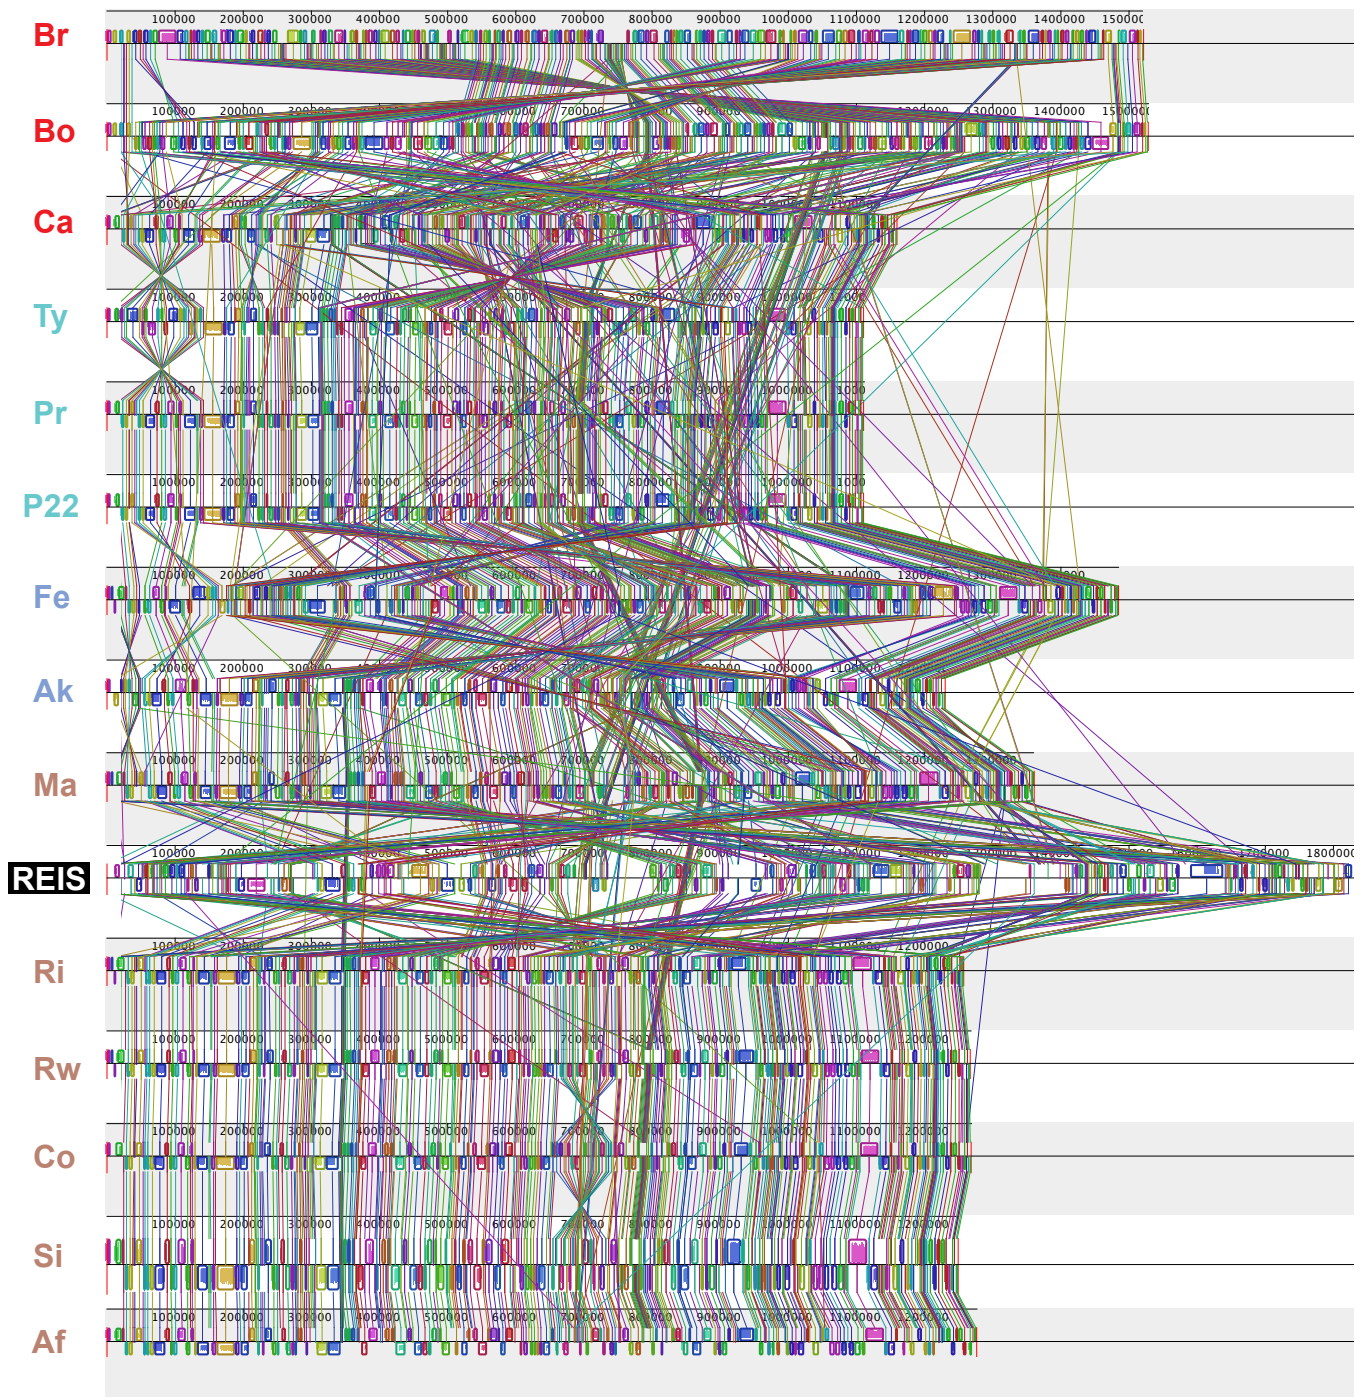

**Alignment of 15 *Rickettsia* spp. genome sequences. The taxa are arranged according to the species phylogeny. *R. peacockii* (Pe) was not included in this alignment, as to better demonstrate the lack of synteny between REIS and the derived SFG rickettsiae. REIS was switched in relation to *R. massiliae* (Ma) to further illustrate its larger size and position of rearrangements in relation to other SFG rickettsiae.**

**D**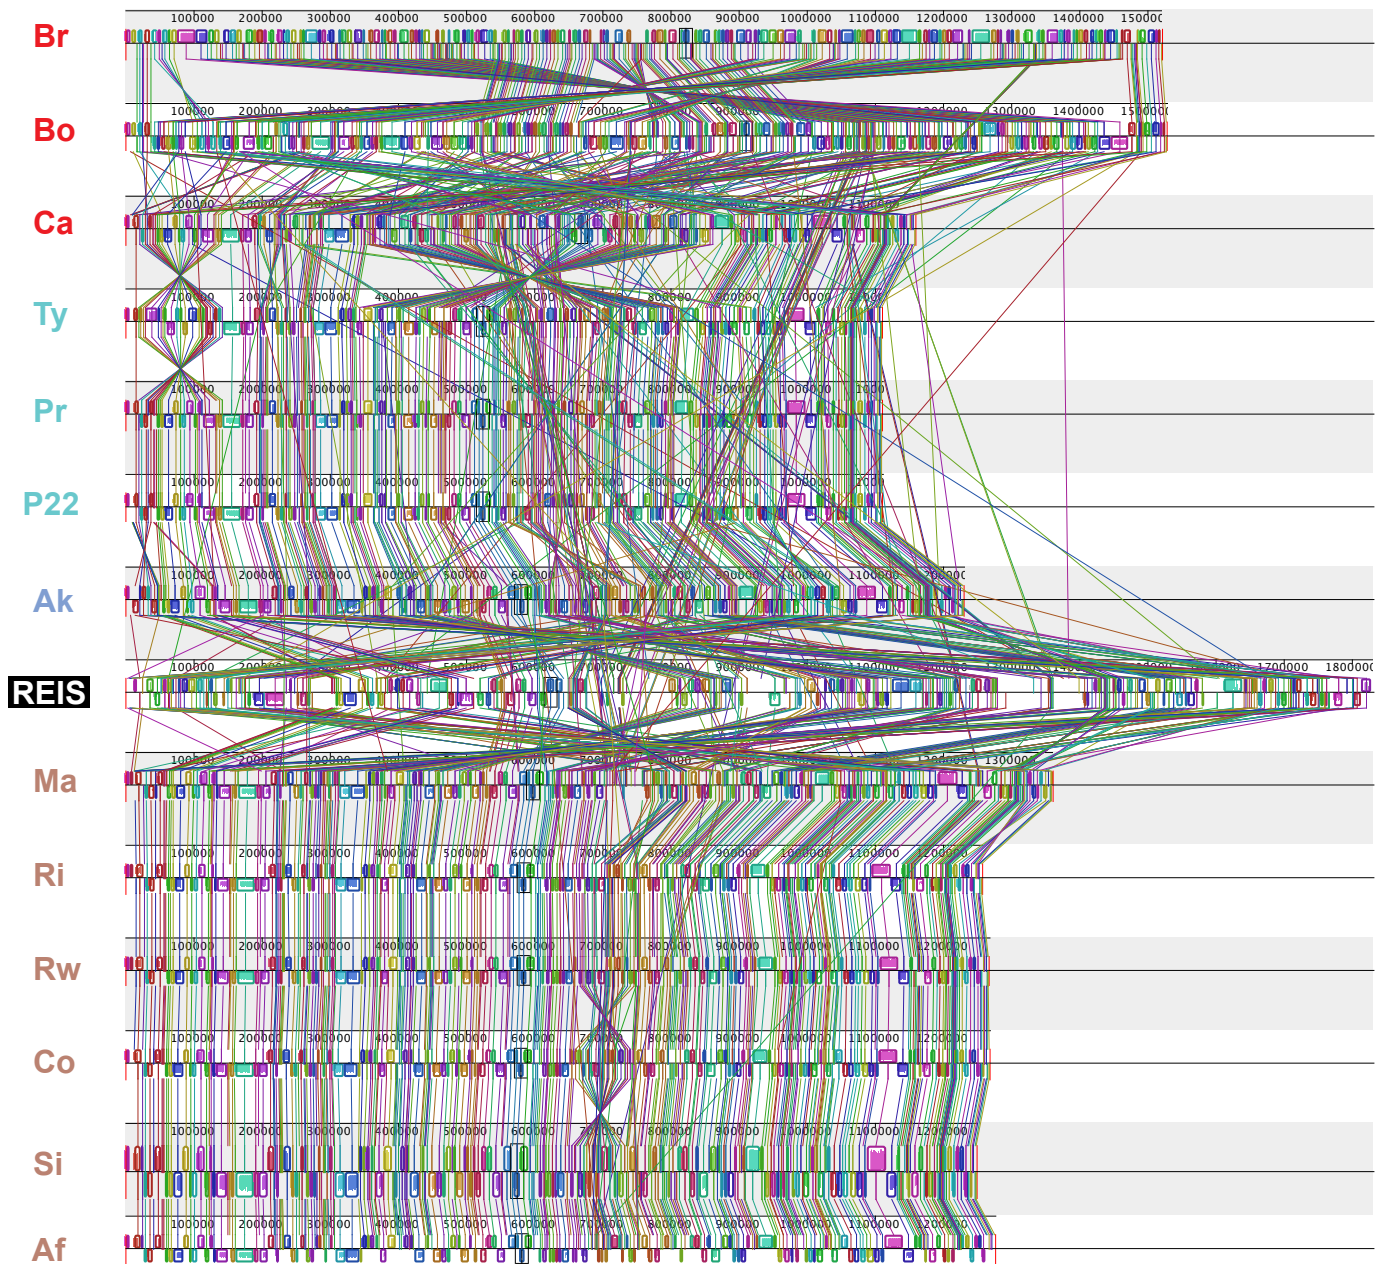

Alignment of 14 *Rickettsia* spp. genome sequences (excluding Fe and Pe). The taxa are arranged according to the species phylogeny. *R. felis* (Fe) and *R. peacockii* (Pe) were not included in this alignment, as to better demonstrate the lack of synteny between REIS and all of the *Rickettsia* spp. genomes except the *R. bellii* strains.

**Fig. S2.** Characteristics of the REIS genes with similarities to the WO-B prophage of *Wolbachia* spp. genomes. Nine of the 10 ORFs depicted in **Fig. 2** are further illustrated here. See **Fig. 6** for analysis of the ATP-binding multidrug resistance transporter MdlB. For each analysis, top blastp subjects (cut-off of 100) with significant alignments to the REIS queries were downloaded from NCBI and aligned using MUSCLE v3.6 [1, 2] (default parameters). For analyses other than the fusion proteins (KWG-OMeT and GT1-SAM) phylogenetic trees were estimated in PAUP\* v4.0b10 (Altivec) under parsimony [3]. Majority rule consensus trees were constructed for analyses generating multiple equally parsimonious trees. **(A)** EamA, S-adenosylmethionine (SAM) transporter; **(B)** Ugd, UDP-glucose 6-dehydrogenase; **(C)** GlpT, glycerol-3-phosphate transporter; **(D)** LtaE, low specificity L-threonine aldolases; **(E)** PhyH, phytanoyl-CoA dioxygenase; **(F)** KWG-OMeT, N-terminal KWG-repeat domain fused to C-terminal O-methyltransferase (type 2) domain; **(G)** GT1-SAM, N-terminal glycosyltransferase (type1) domain fused to C-terminal radical SAM domain; **(H)** WcaG, nucleoside-diphosphate-sugar epimerase.

1. Edgar, R.C., *MUSCLE: a multiple sequence alignment method with reduced time and space complexity*. BMC Bioinformatics, 2004. **5**: p. 113.
2. Edgar, R.C., *MUSCLE: multiple sequence alignment with high accuracy and high throughput*. Nucleic Acids Res, 2004. **32**(5): p. 1792-7.
3. Swofford, D., *PAUP\*: Phylogenetic analysis using parsimony (\*and other methods), version 4 ed.*, 1999, Sinauer: Sunderland, MA.

**A**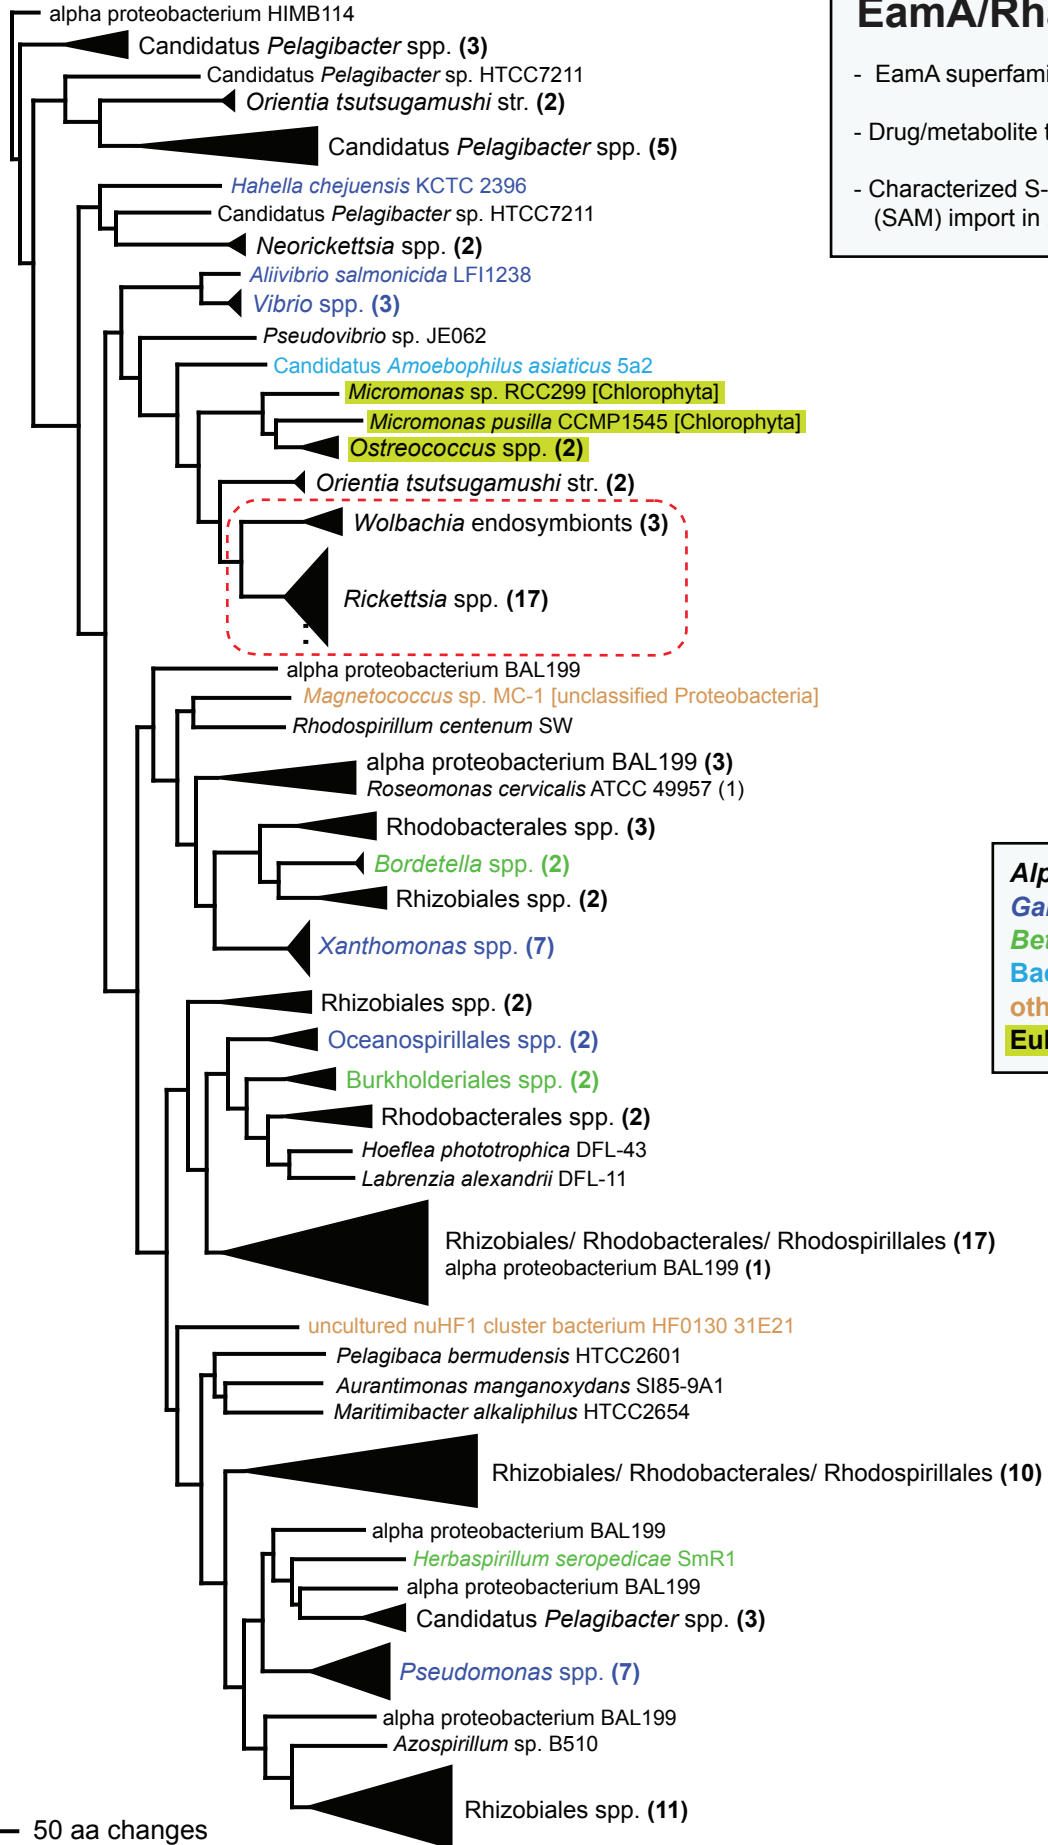**EamA/RhaT**

- EamA superfamily (NT domain)
- Drug/metabolite transporter (RhaT)
- Characterized S-adenosylmethionine (SAM) import in *Rickettsia prowazekii*

**Alphaproteobacteria**  
**Gammaproteobacteria**  
**Betaproteobacteria**  
**Bacteroidetes**  
**other bacteria**  
**Eukaryota**

— 50 aa changes

**B**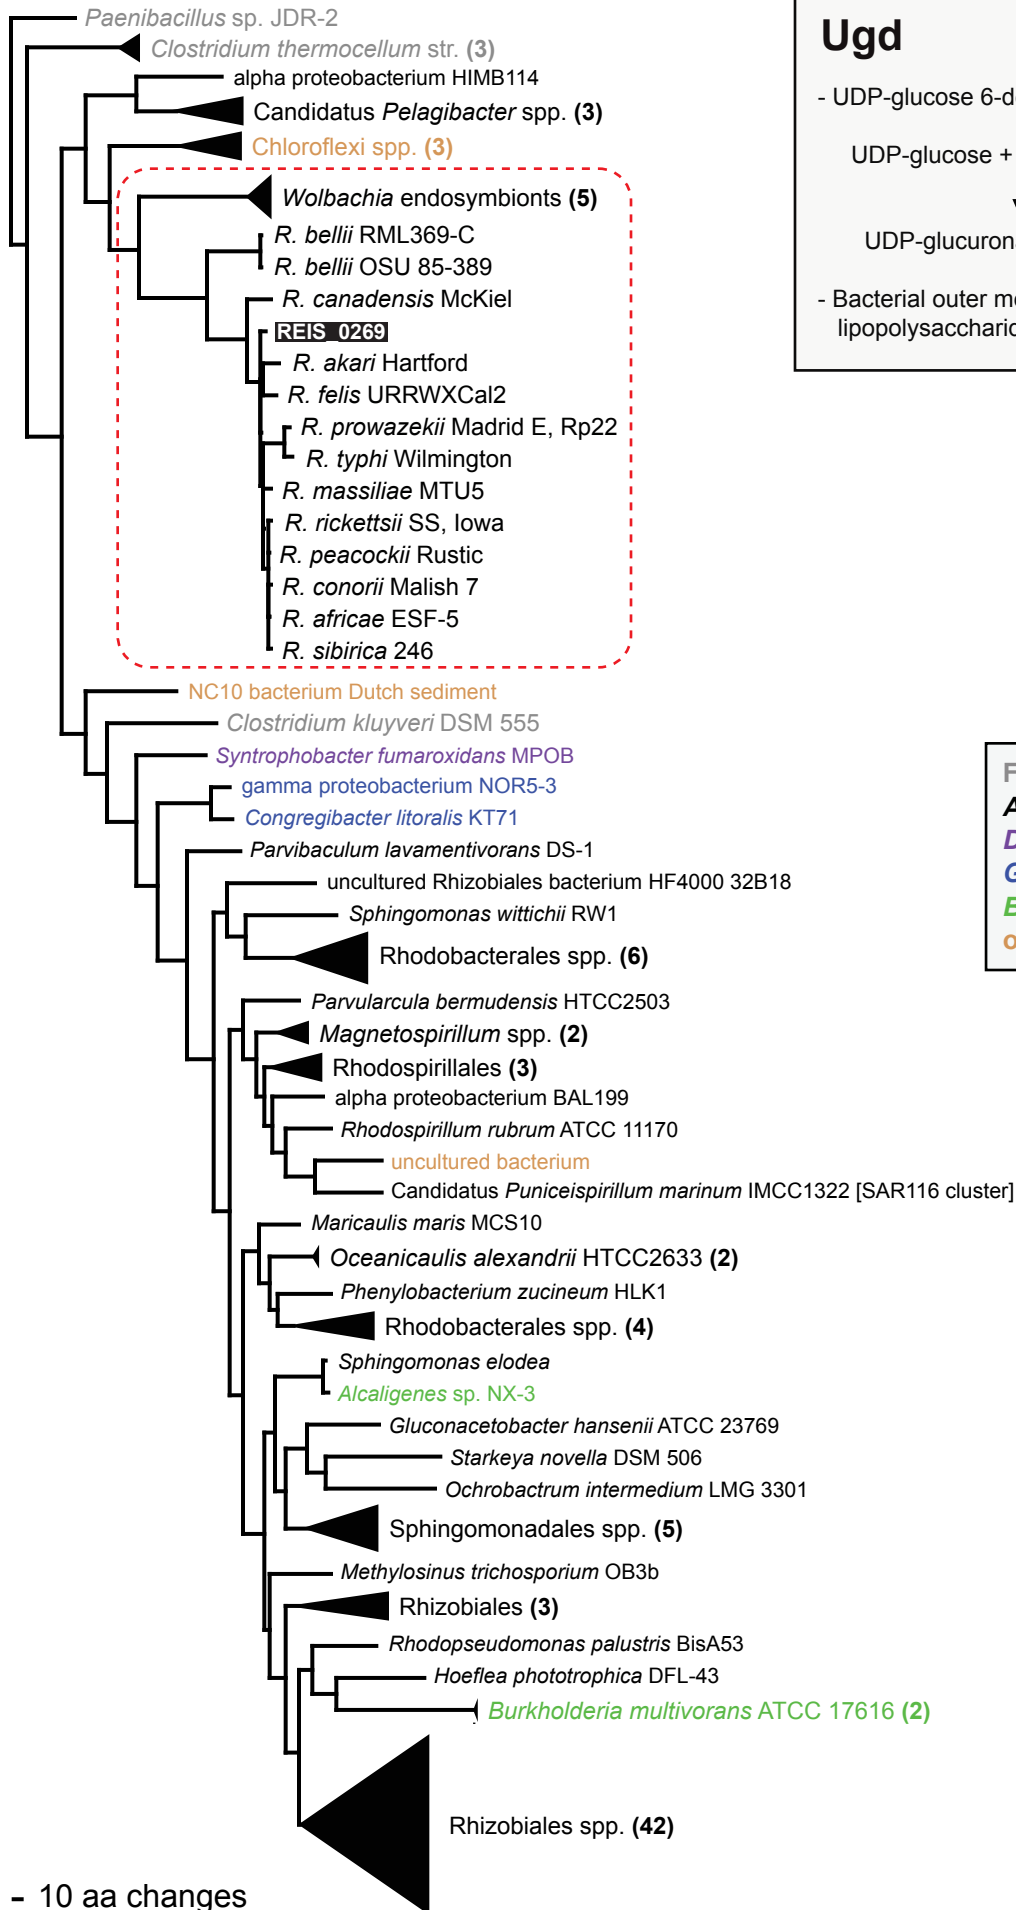

- 10 aa changes



C

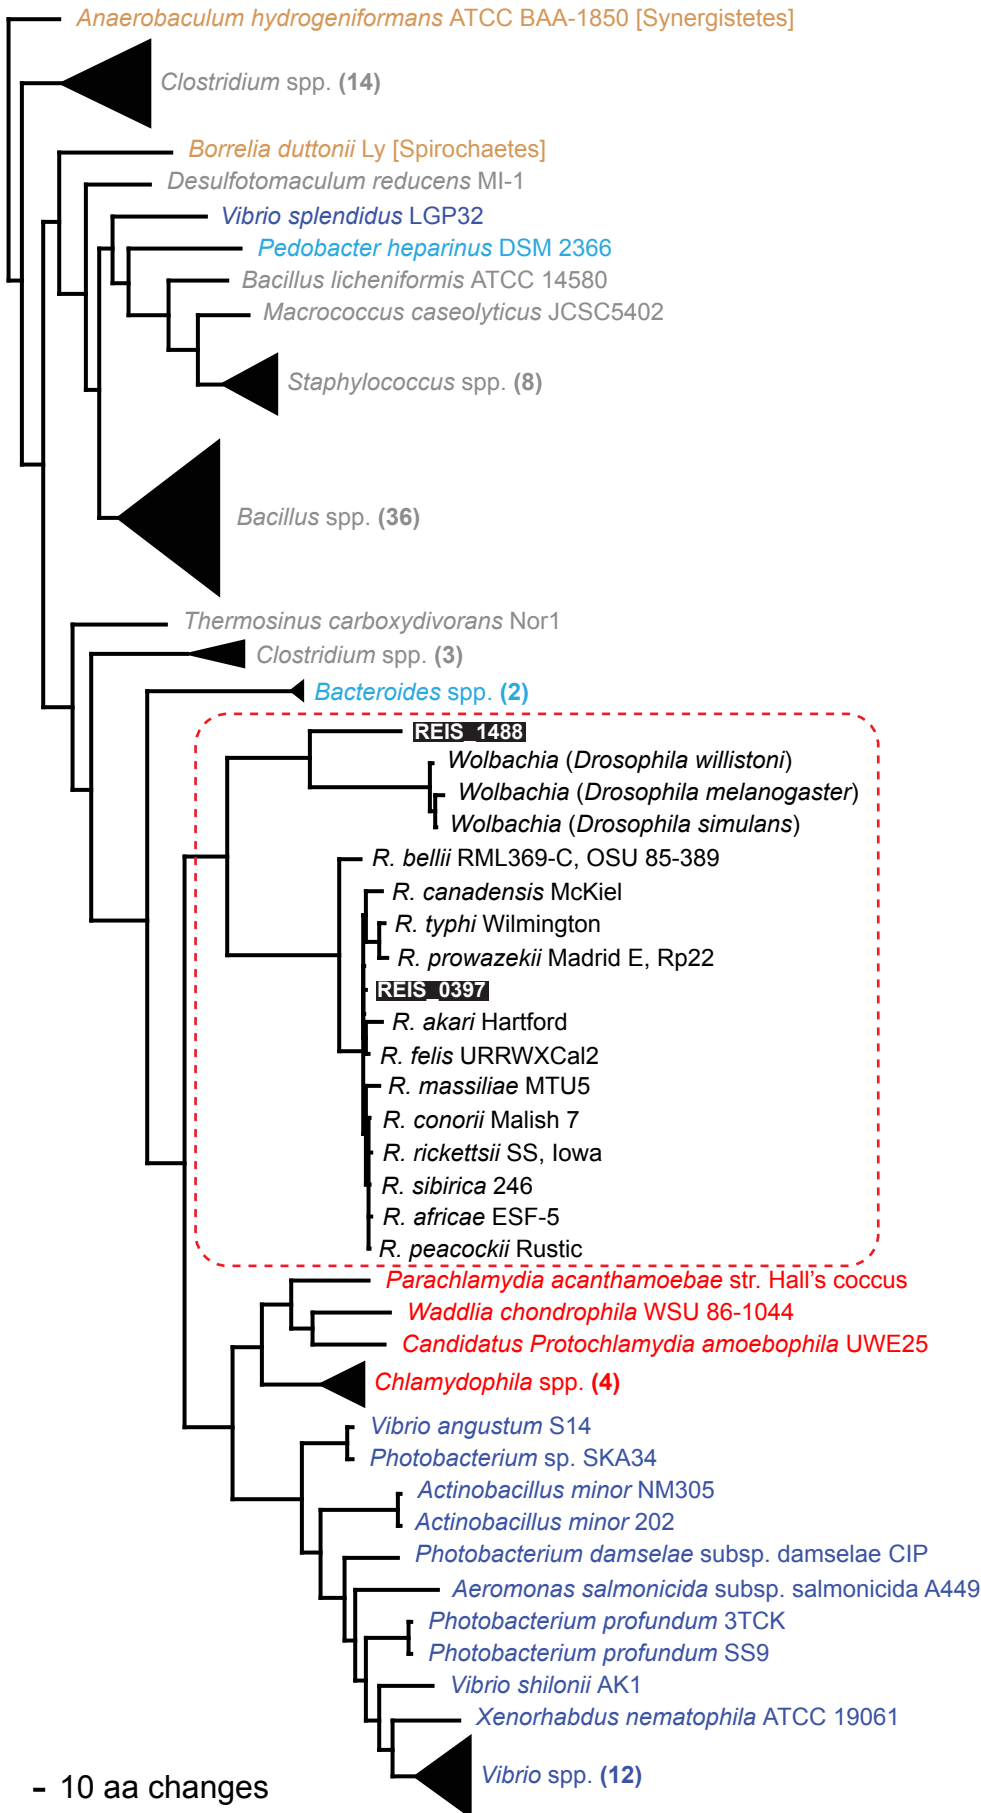

## GlpT

- Glycerol-3-phosphate transporter
- Host G3P exchanged for bacterial cytosolic phosphate
- G3P import has been reported in *Rickettsia prowazekii*, although a specific transporter has not been characterized.

### Firmicutes

Chlamydiae

Alphaproteobacteria

Gammaproteobacteria

Bacteroidetes

other bacteria

D

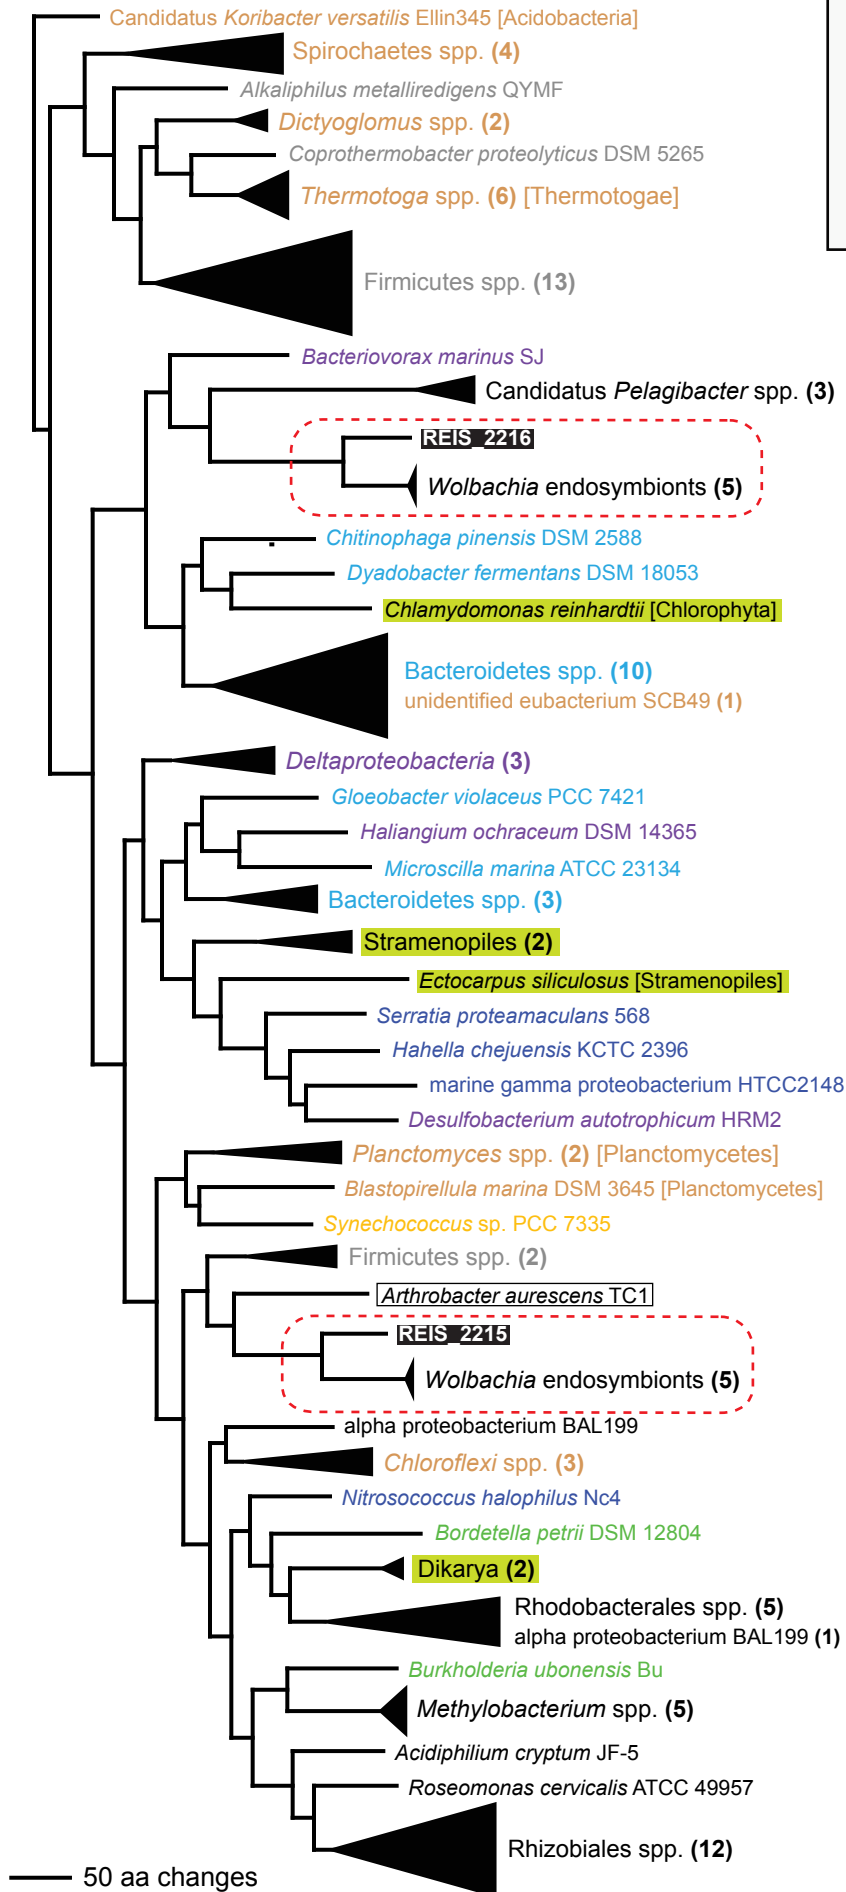

## LtaE

- Threonine aldolase family
- L-threonine → glycine + acetaldehyde
- L-allo-threonine → glycine + acetaldehyde
- Glycine biosynthesis

### Actinobacteria

- Firmicutes
- Cyanobacteria
- Alphaproteobacteria
- Deltaproteobacteria
- Gammaproteobacteria
- Betaproteobacteria
- Bacteroidetes
- other bacteria
- Eukaryota

E

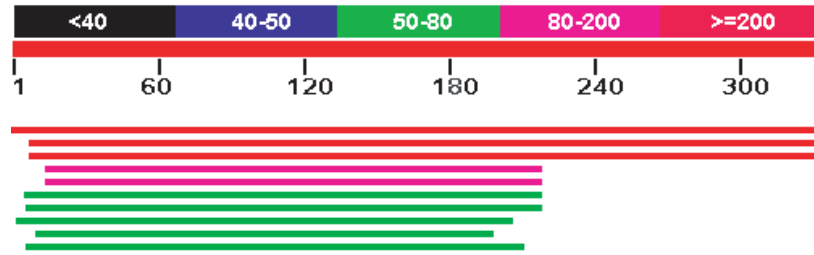

## PhyH

- phytanoyl-CoA dioxygenase
- phytanoyl-CoA → 2-hydroxyphytanoyl-CoA
- lipid/fatty acid synthesis (eukaryotes)
- biosynthesis of mitomycin antibiotics/ polyketide fumonisin (bacteria)

uncultured bacterium HF770 09N20  
*Tribolium castaneum*

### REIS

*Wolbachia endosymbiont (D. melanogaster)*  
*Wolbachia endosymbiont (D. simulans)*  
*Herbaspirillum seropedicae SmR1*  
*Haliangium ochraceum DSM 14365*  
*Plesiocystis pacifica SIR-1*  
*Haliangium ochraceum DSM 14365*  
*Haliangium ochraceum DSM 14365*

|    |                                                |      |
|----|------------------------------------------------|------|
| 6  | VDQFRKDGFLVIGNLLDLE---- <td>(47)</td>          | (47) |
| 17 | RQFYEDNGYIVIKNNVSHA----LLDEIQDRFIKICDGVADPGFMT | (59) |
| 7  | MEKLQDDGFFIKNLISLD----LVTWHLNDIKNKIAGSAEEFGIS  | (49) |
| .. | MKALQKNGFFIKNLVPLE----LITQSLNDIISKISKLSQELGVS  | (42) |
| .. | MKALQKNGFFIKNLVPLE----LITQSLNDIISKISKLSQELGVS  | (42) |
| 9  | VAFFREQGYLLKGMVPADLRERMLAVTRDHLQRAVAPLEYEAEVG  | (55) |
| 8  | AQRFRDHGYFVLPALASAD----DLALLRAACAWAVGVVDAAMDAA | (50) |
| 6  | RRRYAELGWLVPGLITRA----RALELARAFEVQTRWAEAIQV    | (48) |
| 16 | RSYFDVHGYAVIDTVLAVD----ERAALRGALEALWARCASEQSLP | (58) |
| 16 | RSYFDVHGYAVIDTVLAVD----ERAALRGALEALWARCASEQSLP | (58) |

\*

|      |      |    |                                                                               |       |
|------|------|----|-------------------------------------------------------------------------------|-------|
| uncb | PDEV | 18 | WKADSTIARTVLR-QDLGREIAHLANWPGTRLF--QDNLLWKPP----GARPIGHHQDNAYVGVWLMPOEIVSCWM  | (137) |
| Tcas | VMKD | 15 | KIQDFLYDEVLFKYCSDKPVVDVIESIIGPNI TGAHSM LINKPPDADPGASLHPLHQDLHYFFRPADRIAASWT  | (153) |
| REIS | VSDY | 6  | WVAPSQITRTISD-LLNDI IKDKLEKLLQCQIVNKKSNVICKTAD---LVDVAVPFHQDISYNP-DNYPH-FSVWL | (128) |
| wMel | TSDY | 6  | WGTSSQVTRIVSQ-VLDKIIKNYLEKSLQCQIILQKNSNVICKTAD---LIDAVPFHQDISY-SFNDPYH-FSVWL  | (121) |
| wSim | TSDY | 6  | WGTSSQVTRIVSQ-VLDKIIKNYLEKSLQCQIILQKNSNVICKTAD---LIDAVPFHQDISY-SFNDPYH-FSVWL  | (121) |
| Hser | YEGA | 18 | WQRDPVYREWAGS-RALVAILHQLFDEPVCITLAHHNCVMTKHPA---FGTATGWHRDIRYWSFPRNEL-ISVWL   | (147) |
| Hoch | GSER | 15 | HKRHPRLPGFLYS-PLMVALCRLALGRDAYLFL---EQFVVKGAG---DGAALPWHQDAGYLPFSPPY-ITVWI    | (136) |
| Ppac | PDEY | 10 | WERNASFKAQLFD-PRAAEIAAELIDCARVRF--HDHLIAKPPL---GGTIPWHRDLPNWPVAEPRA-LSCWL     | (130) |
| Hoch | VTEY | 10 | WRHETTFAGFLAD-PRSWQTAALFMGQGGARLL--HDHVIAPAG---GSGAVPWHQDQPYWPVDIDYG-VSCWC    | (140) |
| Hoch | VTEY | 10 | WRHETTFAGFLAD-PRNWQTAALFMGQGGARLL--HDHVIAPAG---GSGTVPWHQDQPYWPVDIDYG-VSCWC    | (140) |

\*

\*

\*\*

\*

|      |                               |    |                                                 |     |       |
|------|-------------------------------|----|-------------------------------------------------|-----|-------|
| uncb | ALDDTQAOQSGTLELIRGSHRWTHSQPDS | 23 | DIVSIEIPCGGASFHHGWVWHGSGNNRTASPRRALVLHGISSASEF  | 55  | (289) |
| Tcas | AMERVDENNGCLYVPGSHKW-ELYPHT   | 19 | PKVNVVMEKGDVTFVHPILLHGSGPNRTKGFRAISCHYADSNCYF   | 53  | (298) |
| REIS | ALNDVYEASGALQI IKNSHNW-KIKPAV | 18 | QTITLPI SAGEAIVFNSKLWHGSGENLNAKDRFAYVTRWVVKDKEF | 114 | (333) |
| wMel | ALNNVNKTS GALQVIEDSHNW-KIQPLV | 18 | KIKSLPISAGDAIVFDSRLWHGSDKNIDAKDRFAYVTRWVVKDKSL  | 117 | (229) |
| wSim | ALNNVNKTS GALQVIEDSHNW-KIQPLV | 18 | KIKSLPISAGDAIVFDSRLWHGSDKNIDAKDRFAYVTRWVVKDKSL  | 117 | (229) |
| Hser | ALGAETPENGALKFI PGSHKL-KLQPEQ | 19 | QGIALSLEPGDVVLFHSGLFHAAGRNDSDQVKCSAVFAYHG-----  | 21  | (255) |
| Hoch | PLDDVDQDNGTLALLPYGR-A-GTRERV  | 20 | ELVCAP--AGSVVLMSS TLLHRS GPNRSARPRRAFLAQY-----  | 46  | (265) |
| Ppac | ALDDAPPDAGAMRFMPGGHRL-PETSSI  | 16 | EAVPVPVSAGDAVFHHCLSWHCSPPNATRAWRRAYIT IYLDADCTF | 36  | (255) |
| Hoch | PLEDVGPDDGGCLEVIDGSHRW-GQSPPV | 14 | DRVELPLSAGGLVVLHSLTWHRSRNRASGVRPAYITLWLPDARY    | 167 | (394) |
| Hoch | PLEDVGPDDGGCLEVIDGSHRW-GQSPPV | 14 | DRVALPLSAGGLVVLHSLTWHRSRNRASGVRPAYITLWLPDARY    | 167 | (394) |

\*

\*

\*

\*

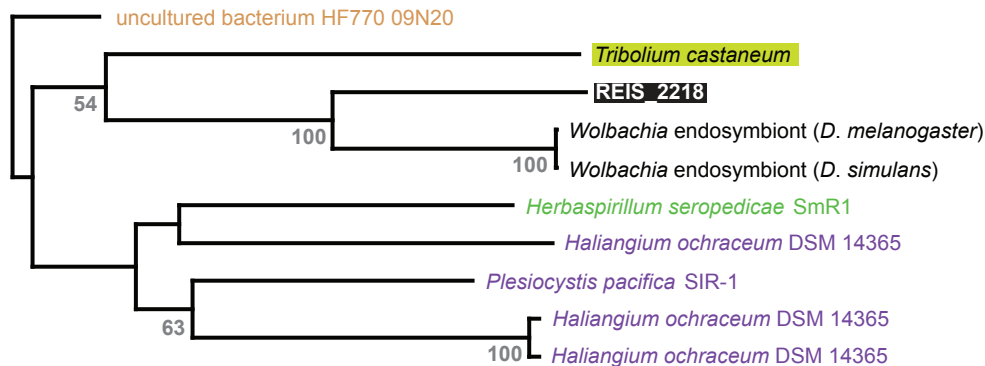

50 aa changes

**Alphaproteobacteria**  
**Deltaproteobacteria**  
**Betaproteobacteria**  
**other bacteria**  
**Eukaryota**

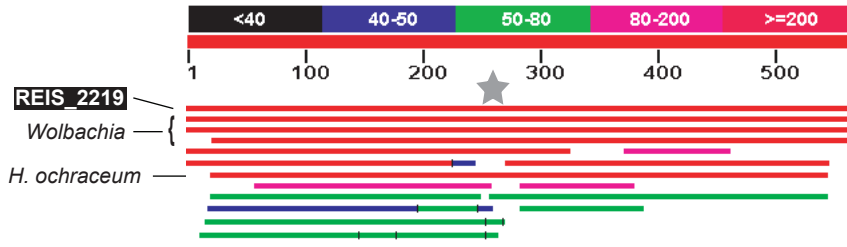

### KWG-OMeT

- KWG-repeat domain ■
- O-methyltransferase domain ■
- protein fusion detected only in REIS, *Haliangium ochraceum*, and *Wolbachia* endosymbionts

Hoch -----MSWREARVAATGTHHVCNGAPLYDERFDEVLKFHEPGLAPVRRGGRAWHIRSDGTAAAEQRFQRT (65)  
**REIS** MQDMQYKFTVDQLTESNNLNSLKLKISPCQKQFHTLEEKPLYTTRFLHVEKFFHEPGLAPVYDKTGAYHINLKGEAAATKRFSKT (84)  
 wMel MQNMQHEKTIISQLMKDS--EYLKSIKRVSPCERFHQLSENPLYKNRFIRVDKFFHEPGLAPVYDETGAYHIDAMGEAIYRDRFLKT (82)  
 wSim MQNMQHEKTIISQLMKDS--EYLKSIKRVSPCERFHQLSENPLYKNRFIRVDKFFHEPGLAPVYDETGAYHIDAMGEAIYRDRFLKT (82)  
 wRi -----MKDS--EYLKSIKRVSPCERFHQLSENPLYKNRFIRVDKFFHEPGLAPVYDETGAYHIDAMGEAIYRDRFLKT (69)

\*                   \*\*\*   \*\*   \*   \*\*\*\*\*                   \*   \*\*   \*   \*   \*\*

Hoch FGFYEGLAAVDSGVGWHIHPDGRPLTATRYAWCGNFQNGYCAVRDHSYGAYVHLTHAGAPAYGARWRYAGDFRDGVAVVQGDG (149)  
**REIS** HGFYCGRAAVEDEARCYHIDSHANRVYKQSYQWVGNYQENICVVRKSN-KFYHIDLHGKLYQEAYDYVGDFKDDIAVVY-KDG (166)  
 wMel FGFYCNRAAVEDDGTGYHIDPSGCRVYKHSYQWIGNYQEDICVIRKHD-KFFHIDLNGNRVYEQEYNYVGFDFKDGIAVVH-KDG (164)  
 wSim FGFYCNRAAVEDDGTGYHIDPSGCRVYKHSYQWIGNYQEDICVIRKHD-KFFHIDLNGNRVYEQEYNYVGFDFKDGIAVVH-KDG (164)  
 wRi FGFYCNRAAVEDDGTGYHIDPSGCRVYKHSYQWIGNYQEDICVIRKHD-KFFHIDLNGNRVYEQEYNYVGFDFKDGIAVVH-KDG (151)

\*\*\*   \*\*\*           \*\*                   \*   \*   \*   \*   \*                   \*   \*   \*   \*   \*   \*   \*   \*   \*   \*   \*

Hoch RSTHIDARGDFVHVSFGLDLDFVHKGFARARDEGGWMHVDMAGRAQYRRRFAAVEPFYNGQARVERFDGGLEVIDEAGDCVSTL (233)  
**REIS** KSTHINPQGLIHKNWYKQLGIFHKGFIAEDNNGWFHVDIVGNAIYLQRYKTIEPFYNGLAMVKAYDDTLGQIDTGNKIFVI (250)  
 wMel KATHINNHGKLVHKNWYKLVNFVHKGFIAEDKHGWFHIDINGNPVYRQRFKMVEAFYNGMAKVETFEGLVQIDITGNVKFSI (248)  
 wSim KATHINNHGKLVHKNWYKLVNFVHKGFIAEDKHGWFHIDINGNPVYRQRFKMVEAFYNGMAKVETFEGLVQIDITGNVKFSI (248)  
 wRi KATHINNHGKLVHKNWYKLVNFVHKGFIAEDKHGWFHIDINGNPVYRQRFKMVEAFYNGMAKVETFEGLVQIDITGNVKFSI (235)

\*\*\*   \*   \*           \*   \*\*\*\*\*   \*   \*   \*   \*   \*                   \*   \*   \*   \*   \*   \*   \*   \*   \*

Hoch RSP-LRSEFARLSEDMVGFWKTQTIHAAVALGVFEALPATDARIAEVCRLRPARARLLRALAELGLL--ERGDDGWQASERGV (314)  
**REIS** SLPELEAQIHKISAELAGFWKTYLINVAIELDLLNILPATTELLSKQLGIEPNLQRLLRALWEIELISYNQNKDLWQVLPKGE (334)  
 wMel FDLDKESQVHKISAELSAFWKTYLANVAIELDLLNILPATMPVLSQKLNIVPNLERLLRALWEIGFIDYDKNKDLWQLSSKKG (332)  
 wSim FDLDKESQVHKISAELSAFWKTYLANVAIELDLLNILPATMPVLSQKLNIVPNLERLLRALWEIGFIDYDKNKDLWQLSSKKG (332)  
 wRi FDLDKESQVHKISAELSAFWKTYLANVAIELDLLNILPATMPVLSQKLNIVPNLERLLRALWEIGFIDYDKNKDLWQLSSKKG (319)

\*                   \*\*\*\*           \*   \*                   \*\*\*\*                   \*\*\*\*\*   \*\*                   \*   \*\*   \*

Hoch YL-----QAAHPWTLAGAAREYGRDFSRMWEALPAALRADSDWCAPDIFGEVATDPERTAHHQMLASALHDYAGLPAALA (391)  
**REIS** FLKNSSFLPQATKMWARVATEKN-----WLKITGLLKQKT-IYSFASFKEQETA--LKIEFYQALIGYTKLDTREFYKIN (407)  
 wMel CFKEIPFLPKAAAMWARVAAEKN-----WLKIADILRQES-ISSFESFKEKETSEDRKIAFYQALLGYSRFDTKEFNSRVN (407)  
 wSim CFKEIPFLPKAAAMWARVAAEKN-----WLKIADILRQES-ISSFESFKEKETSEDRKIAFYQALLGYSRFDTKEFNSRVN (407)  
 wRi CFKEIPFLPKAAAMWARVAAEKN-----WLKIADILRQES-ISSFESFKEKETSEDRKIAFYQALLGYSRFDTKEFNSRVN (394)

\*   \*                   \*                   \*                   \*   \*   \*                   \*   \*   \*   \*

Hoch LRGDERVIDAGGGLGTLAQLLV-AAYPRLRVVFLERAEVVALAEQAQDERVELCTADLFEPWGETGDAVVLARVLHDWDDAEAL (474)  
**REIS** IADNTNILLF--GIHSLALIEIETLSNKDKNSINLNYNDQEIPEELIKYNNVSLITQD--NL-AKNYDLSIFCRFLQNHDDKVI (486)  
 wMel IDGAKNILLF--GVHSLFLAYS-DIHNKGSIGLYYYNEHKVPRQAVEDLKIKLITQE--ELSATNYELGVFCRFLQHYDDDKVL (486)  
 wSim IDGAKNILLF--GVHSLFLAYS-DIHNKGSIGLYYYNEHKVPRQAVEDLKIKLITQE--ELSATNYELGVFCRFLQHYDDDKVL (486)  
 wRi IDGAKNILLF--GVHSLFLAYS-DIHNKGSIGLYYYNEHKVPRQAVEDLKIKLITQE--ELSATNYELGVFCRFLQHYDDDKVL (473)

\*   \*                   \*                   \*                   \*   \*                   \*   \*                   \*   \*   \*\*

Hoch GLLRRARAALPPGGRVFI VEMLLSDSDMGGSLCDLHLLVATGGKERAEAEYAALLDEA-GFDCHGAQRFSLSLSSILTGVAR (554)  
**REIS** FYLRLAKDKKIT--RILLIETILT DNSPIGGAVDINIMVETGGKLRKLNDEAAILTQVGD LKISDVLP L TDYLSVIDIRYQ (565)  
 wMel SYLKLKVNKNGIP--RVLVIETILDYYSVPGGSVDINVMVETGGKLR T L SDWK R I L K Q V K L K V F S I V P L T D Y L S V I D I R C - (564)  
 wSim SYLKLKVNKNGIP--RVLVIETILDYYSVPGGSVDINVMVETGGKLR T L SDWK R I L K Q V K L K I F S I V P L T D Y L S V I D I R C - (564)  
 wRi SYLKLKVNKNGIP--RVLVIETILDYYSVPGGSVDINVMVETGGKLR T L SDWK R I L K Q V K L K I F S I V P L T D Y L S V I D I R C - (551)

\*                   \*   \*   \*                   \*   \*                   \*   \*   \*   \*   \*                   \*                   \*



H

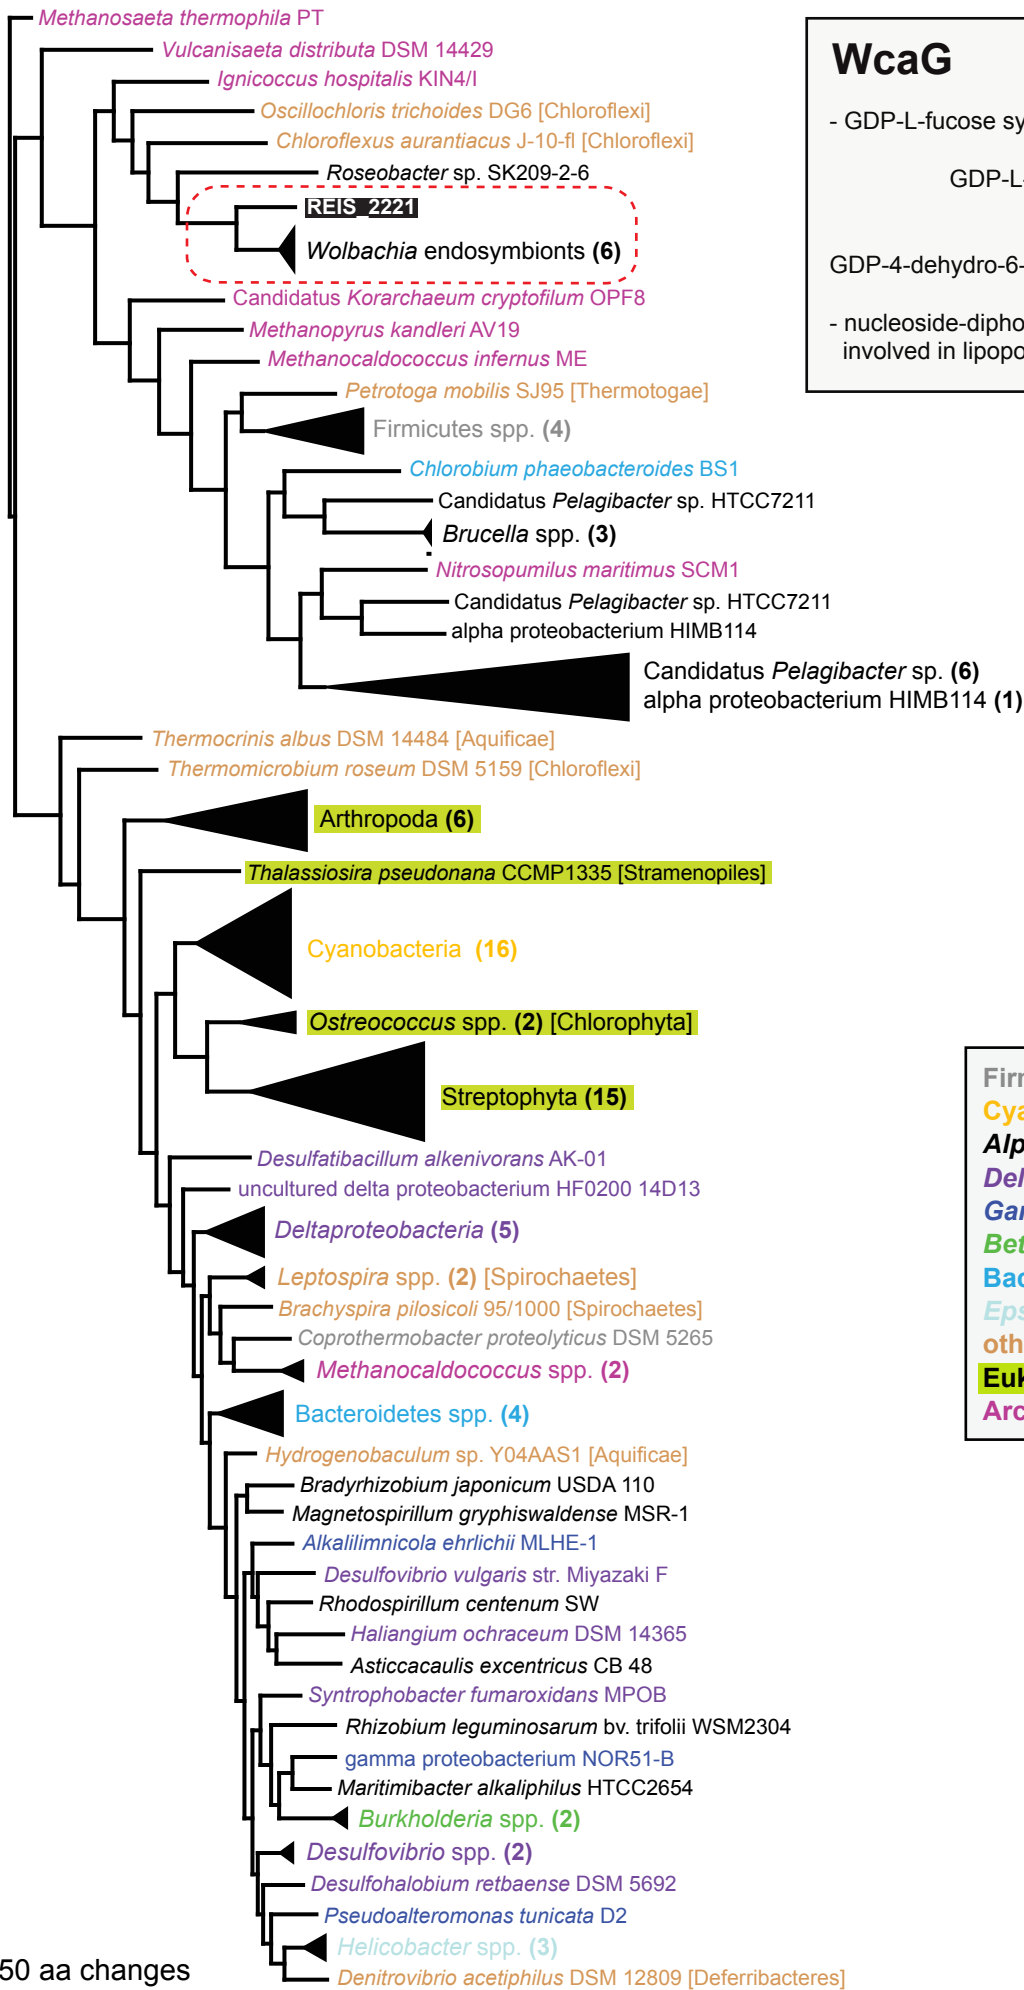

**WcaG**

- GDP-L-fucose synthase

$$\text{GDP-L-fucose} + \text{NADP}^+ \rightarrow \text{GDP-4-dehydro-6-deoxy-D-mannose} + \text{NADPH}$$

- nucleoside-diphosphate-sugar epimerases involved in lipopolysaccharide biosynthesis

Firmicutes  
 Cyanobacteria  
 Alphaproteobacteria  
 Deltaproteobacteria  
 Gammaproteobacteria  
 Betaproteobacteria  
 Bacteroidetes  
 Epsilonproteobacteria  
 other bacteria  
 Eukaryota  
 Archaea

— 50 aa changes

**Fig. S3.** Generation of orthologous protein families across 16 Rickettsiaceae genomes. OrthoMCL [1] was used to generate orthologous groups (OGs) from a total of 20,035 predicted proteins across sixteen complete Rickettsiaceae genomes (summarized in gray box at top). Throughout the schema, blue and red numbers depict protein and OG counts, respectively. Characteristics of different protein family categories are described moving counterclockwise from the box at top (following the gray arrows). **Unique proteins** are subdivided into true singletons and dupletons, which are unique proteins that are duplicated within a genome. Unique proteins are further described for each genome (green inset), with a gray box illustrating the 32% of the REIS genome comprised of unique proteins. **Core proteins** are subdivided into perfect families, which have one protein from every genome, and imperfect, which have at least one genome contributing multiple proteins. The total Rickettsiaceae core genome is comprised of 468 OGs, with an additional 166 OGs present in all *Rickettsia* genomes (thus the core OGs of *Rickettsia* genomes total 634). **Non-conserved proteins**, which are encoded within more than one genome (but not all genomes), comprise 38.7% of all proteins across the 16 genomes. These are subdivided into singular OGs, which do not contain gene duplications, and multiple OGs, which do contain gene duplications. More non-conserved OGs do not include REIS proteins (**REIS -**, 60.4%), however the non-conserved OGs including REIS proteins (**REIS +**) have a greater number of duplicate proteins, indicative of the proliferated MGEs in some genomes (e.g., STG rickettsiae, REIS). REIS encodes 836 non-conserved proteins, which is far greater than any other Rickettsiaceae genome (see bar graphs, REIS is distinguished by the red dashed box). The majority of duplicate proteins encoded by the REIS genome are MGEs, especially TNPs. Importantly, the **REIS +** singular OGs have an average of 8.5 proteins, whereas the **REIS -** singular OGs only have an average of four proteins. This indicates that the protein families lacking an REIS protein are decaying more rapidly from the core Rickettsiaceae genome. Genome codes as follows: Bg, *O. tsutsugamushi* str. Boryong; Ik, *O. tsutsugamushi* str. Ikeda; Br, *R. bellii* str. RML369-C; Bo, *R. bellii* str. OSU 85 389; Ca, *R. canadensis* str. McKiel; Pr, *R. prowazekii* str. Madrid E; Ty, *R. typhi* str. Wilmington; Fe, *R. felis* str. URRWXCal2; Ak, *R. akari* str. Hartford; REIS, *Rickettsia* endosymbiont of *Ixodes scapularis*; Ma, *R. massilae* str. MTU5; Ri, *R. rickettsii* str. Sheila Smith; Rw, *R. rickettsii* str. Iowa; Co, *R. conorii* str. Malish 7; Si, *R. sibirica* str. 246; Af, *R. africae* str. ESF-5.

1. Li, L., C.J. Stoeckert, Jr., and D.S. Roos, *OrthoMCL: identification of ortholog groups for eukaryotic genomes*. Genome Res, 2003. **13**(9): p. 2178-89.

From a total of 20,035 proteins across 16 genomes, OrthoMCL grouped 18,035 proteins into 2,069 OGs. A subset of these (237 OGs) contains two or more proteins from only one genome (dupleton, D), totaling 1,063 proteins. True singletons (S), present only once in a single genome, total 1,350 proteins.

**Unique**  
2,413 proteins are unique (U) to a single genome; 32% of the REIS genome encodes unique proteins.

|   | REIS    | 16 genomes |
|---|---------|------------|
| U | 739; 64 | 2,413; 237 |
| D | 351; 64 | 1,063; 237 |
| S | 388; 0  | 1,350; 0   |

**Core**  
7,521 proteins are core Rickettsiaceae; an additional 2,343 proteins define the core *Rickettsia*.

perfect (P): one protein per genome  
imperfect (I): one genome w/ 1  $\geq$  protein

|   | Rickettsiaceae | <i>Rickettsia</i> |
|---|----------------|-------------------|
| P | 7,335; 459     | 2,226; 159        |
| I | 186; 9         | 117; 7            |

**Non-conserved**  
7,758 proteins from 1,198 OGs exist in 2-15 genomes. 60% of these OGs (723) lack REIS proteins.

singular (S): one protein per 2-15 genomes  
multiple (M):  $\geq 1$  proteins per 2-15 genomes

|   | REIS +     | REIS -     |
|---|------------|------------|
| S | 2,883; 338 | 2,470; 640 |
| M | 1,816; 137 | 589; 83    |

|             | REIS       |                |            | % of genome |
|-------------|------------|----------------|------------|-------------|
| Bg          | 102        | 125; 31        | 227        | 19.2        |
| Ik          | 328        | 529; 117       | 857        | 43.6        |
| Br          | 27         | 2; 1           | 29         | 2.0         |
| Bo          | 36         | 2; 1           | 38         | 2.6         |
| Ca          | 40         | 0; 0           | 40         | 3.7         |
| Pr          | 8          | 0; 0           | 8          | 1.0         |
| Ty          | 7          | 2; 1           | 9          | 1.1         |
| Fe          | 118        | 52; 22         | 170        | 11.2        |
| Ak          | 46         | 0; 0           | 46         | 3.7         |
| <b>REIS</b> | <b>388</b> | <b>351; 64</b> | <b>739</b> | <b>32.0</b> |
| Ma          | 50         | 0; 0           | 50         | 4.2         |
| Ri          | 12         | 0; 0           | 12         | 0.9         |
| Rw          | 144        | 0; 0           | 144        | 10.2        |
| Co          | 13         | 0; 0           | 13         | 1.0         |
| Si          | 9          | 0; 0           | 9          | 0.8         |
| Af          | 22         | 0; 0           | 22         | 2.0         |

**Non-conserved, REIS +**  
Of 4,699 proteins from 475 OGs, REIS encodes 836, or 18%. The avg. for the other genomes is 5%. A total of 423 of these REIS proteins are MGEs, dominated by TNP (304). NOTE: the avg. no. of proteins in singular OGs (338) is 8.5.

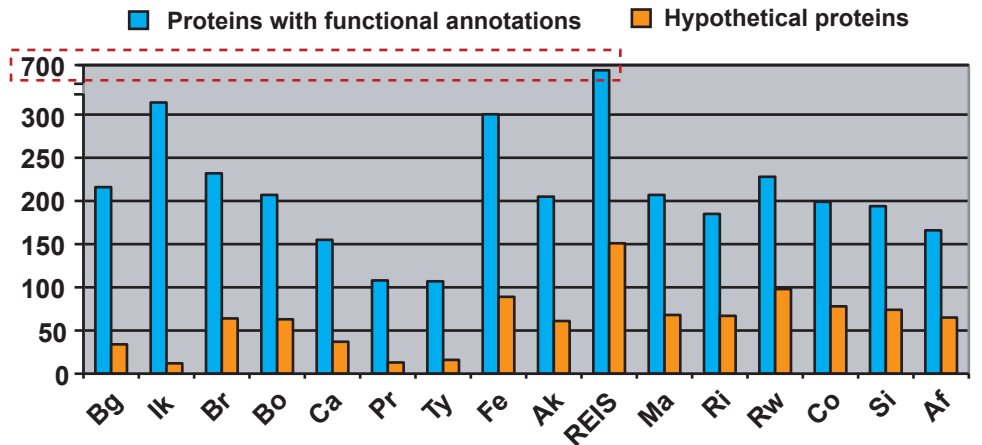

**Non-conserved, REIS -**  
REIS lacks homologs to 3,059 proteins (723 OGs). Proteins missing from the core Rickettsiales and core *Rickettsia* genomes are shown in Table S1. NOTE: the avg. no. of proteins in singular OGs (640) is 4.

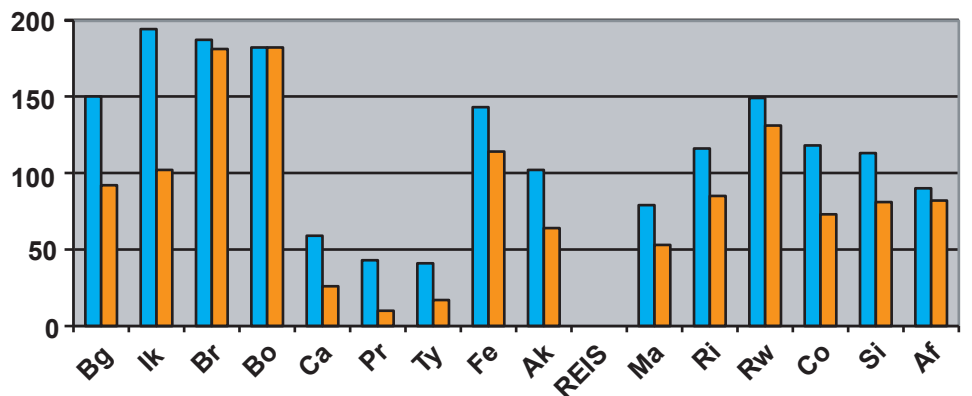



**Fig. S4.** Whole genome-based phylogeny estimation for 46 Rickettsiales taxa. An automated workflow for gene family selection and tree building was implemented through a set of Perl scripts [1]. All protein sequences annotated by RAST [2] for 46 Rickettsiales genomes (plus two outgroup taxa) were downloaded from PATRIC [3]. The following pipeline was implemented to estimate Rickettsiales phylogeny: BLAT (refined BLAST algorithm) [4] searches were performed to identify similar protein sequences between all genomes, including the two outgroup taxa. To predict initial homologous protein sets, mcl [5] was used to cluster BLAT results, with subsequent refinement of these sets using in-house hidden Markov models [6]. These protein families were then filtered to include only those with membership in >80% of the analyzed genomes (39 or more taxa included per protein family). Multiple sequence alignment of each protein family was performed using MUSCLE (default parameters) [7, 8], with masking of regions of poor alignment (length heterogeneous regions) done using Gblocks (default parameters) [9, 10]. All modified alignments were then concatenated into one dataset. Tree-building was performed using FastTree [11]. Support for generated lineages was estimated using a modified bootstrapping procedure, with 100 pseudoreplications sampling only half of the aligned protein sets per replication (NOTE: standard bootstrapping tends to produce inflated support values for very large alignments). All branches in the illustrated tree were supported by 100%. Local refinements to tree topology were attempted in instances where highly supported nodes have subnodes with low support. This refinement is executed by running the entire pipeline on only those genomes represented by the node being refined (with additional sister taxa for rooting purposes). The refined subtree was then spliced back into the full tree. More information pertaining to this phylogeny pipeline is available at PATRIC.

1. Williams, K.P., et al., *Phylogeny of gammaproteobacteria*. J Bacteriol, 2010. **192**(9): p. 2305-14.
2. Aziz, R.K., et al., *The RAST Server: rapid annotations using subsystems technology*. BMC Genomics, 2008. **9**: p. 75.
3. Snyder, E.E., et al., *PATRIC: the VBI PathoSystems Resource Integration Center*. Nucleic Acids Res, 2007. **35**(Database issue): p. D401-6.
4. Kent, W.J., *BLAT--the BLAST-like alignment tool*. Genome Res, 2002. **12**(4): p. 656-64.
5. Van Dongen, S., *Graph Clustering Via a Discrete Uncoupling Process*. SIAM. J. Matrix Anal. & Appl., 2008. **30**: p. 121-141.
6. Durbin, R., et al., *Biological sequence analysis: probabilistic models of proteins and nucleic acids*1998: Cambridge University Press.
7. Edgar, R.C., *MUSCLE: a multiple sequence alignment method with reduced time and space complexity*. BMC Bioinformatics, 2004. **5**: p. 113.
8. Edgar, R.C., *MUSCLE: multiple sequence alignment with high accuracy and high throughput*. Nucleic Acids Res, 2004. **32**(5): p. 1792-7.
9. Castresana, J., *Selection of conserved blocks from multiple alignments for their use in phylogenetic analysis*. Mol Biol Evol, 2000. **17**(4): p. 540-52.
10. Talavera, G. and J. Castresana, *Improvement of phylogenies after removing divergent and ambiguously aligned blocks from protein sequence alignments*. Syst Biol, 2007. **56**(4): p. 564-77.
11. Price, M.N., P.S. Dehal, and A.P. Arkin, *FastTree 2--approximately maximum-likelihood trees for large alignments*. PLoS One, 2010. **5**(3): p. e9490.

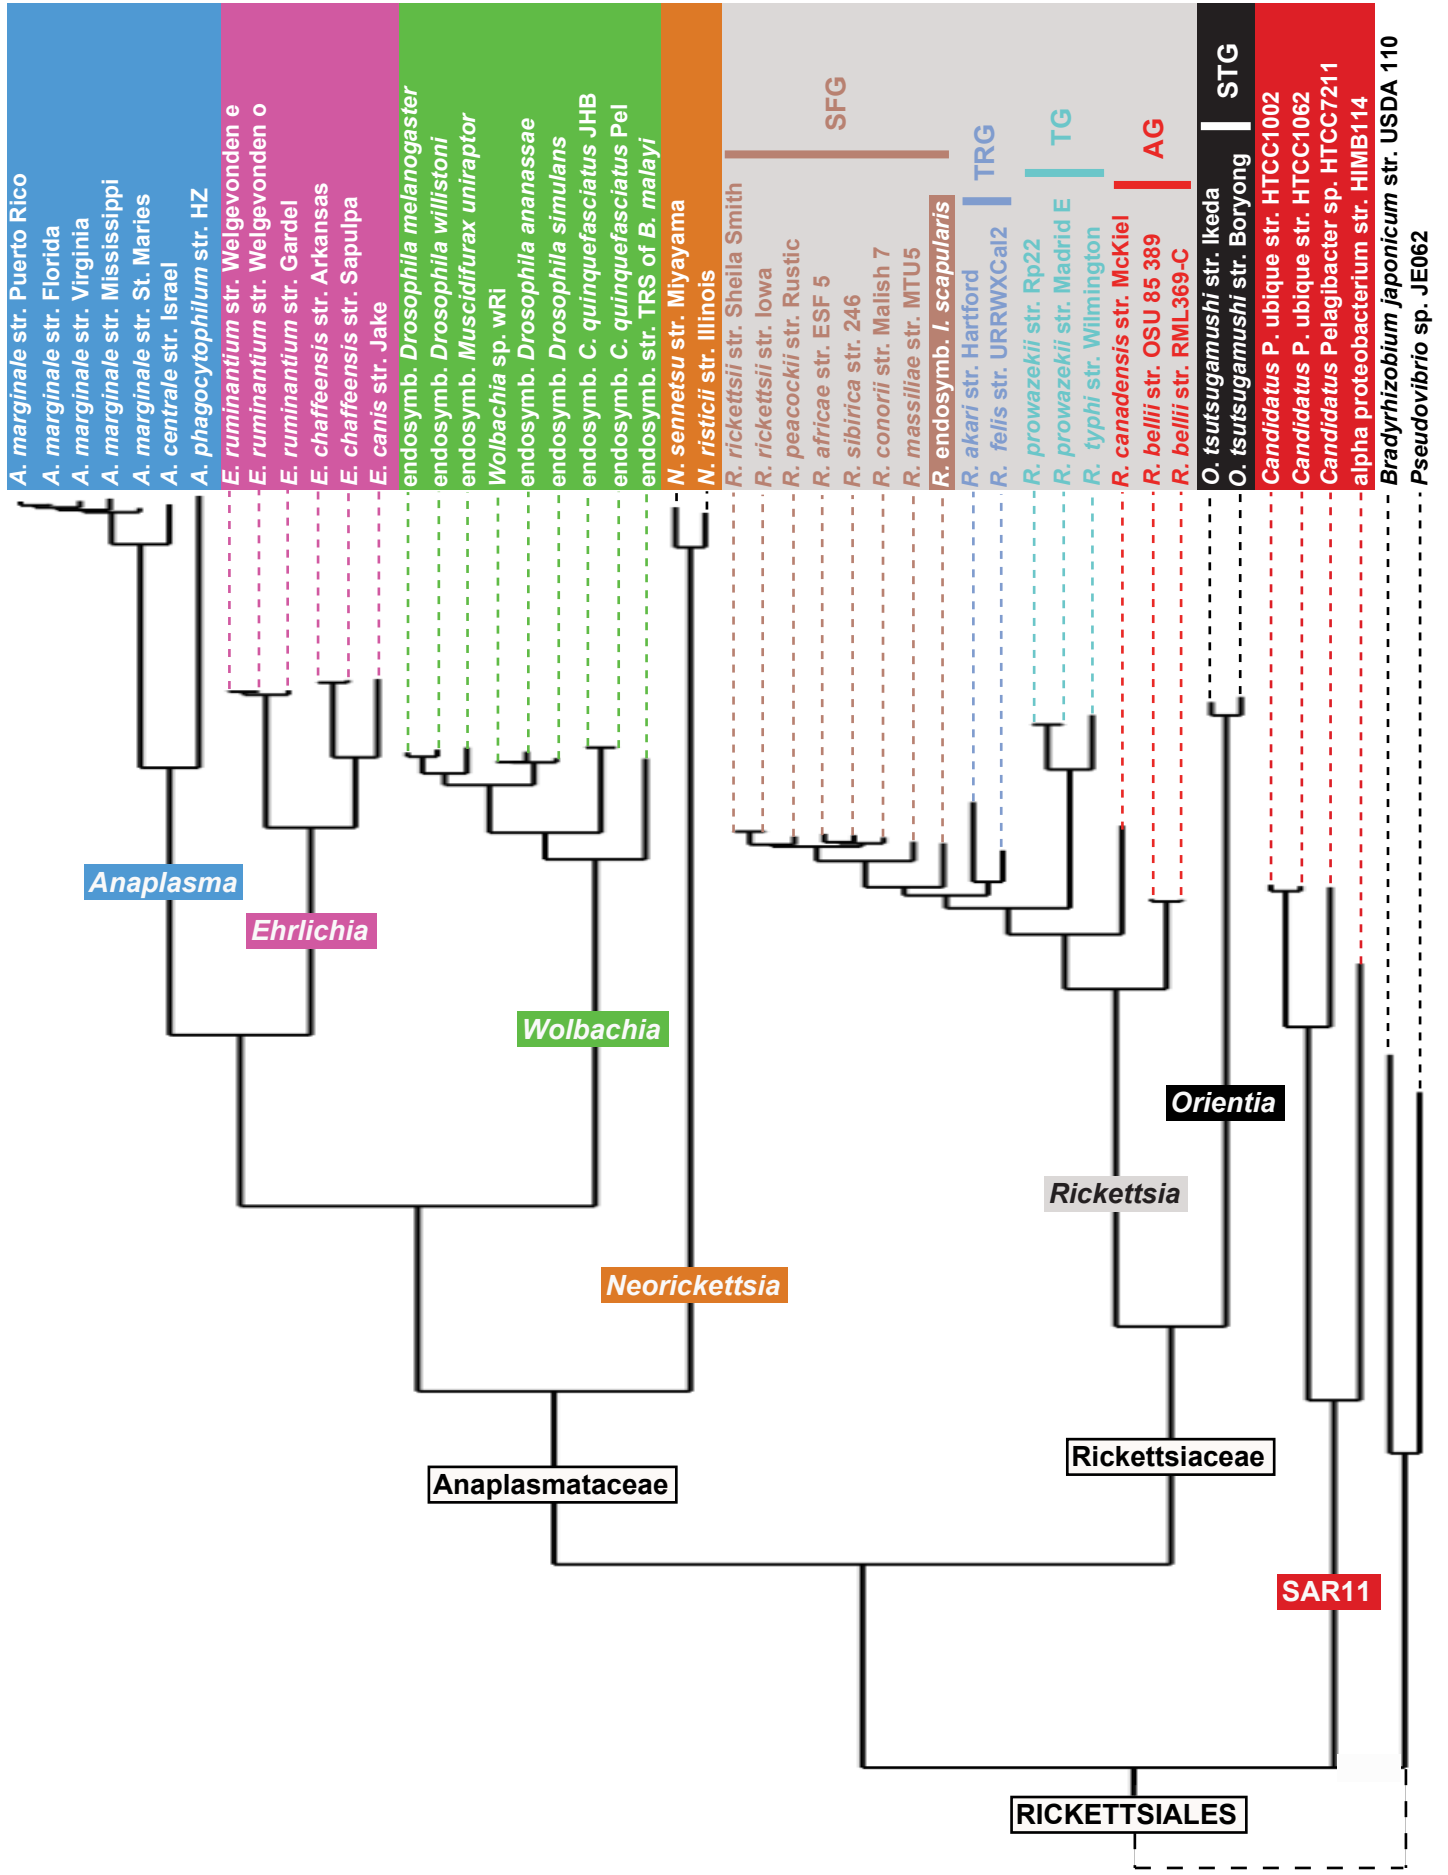

**Fig. S5.** Comparative analysis of REIS RickA-encoding ORFs with RickA proteins from 12 *Rickettsia* genomes. **(A)** Genomic distribution of REIS *rickA* ORFs relative to the *rickA*-encoding region of *R. massiliae* (RMA). Filled pentagons depict genes (indicating direction of transcription). *rickA* ORFs are colored red, with missing fragments in the REIS genes hashed. RMA *rickA* (RMA\_0941) is full length, whereas REIS contains three partial copies: REIS\_1104 encoding the 5' end of *rickA* and two dispersed identical copies of the 3' end of the gene (REIS\_0633 and REIS\_1688). The location of the three REIS *rickA* fragments suggests the following scenario: the insertion sequence (IS) ISPg3 (whose transposase gene is colored blue) inserted into and split *rickA*. Subsequent homologous recombination between the inserted ISPg3 and another copy of the IS (dashed lines between REIS\_0632 and REIS\_1103) inverted a large portion of the REIS genome. Finally, the region of the 3' *rickA* fragment (pink shading) was duplicated into a distant region of the genome. Genes putatively from other mobile genetic elements are shown in black. Orthologous genes in the vicinity of *rickA* across both genomes are shown in green and connected by green shading. All other genes are shown in gray. **(B)** Schema of the RickA protein of *Rickettsia* spp, as originally defined [1, 2]. Red, G-actin binding domain; green, proline rich region; orange, WASP (Wiskott–Aldrich Syndrome protein) homology 2 region; blue, central domain; brown, acidic domain. Dashed box depicts the region of REIS RickA that was interrupted by ISPg3 insertion. **(C)** Protein sequence alignment of RickA proteins from 12 *Rickettsia* genomes and the three ORFs encoding RickA in the REIS genome. Coloring follows the domains illustrated in panel B, with coordinates from the complete protein alignment. Within the Pro-rich region, numbers in parentheses indicate total number of proline residues. Sequences were aligned with MUSCLE v3.6 using default parameters [3, 4].

1. Guin, E., et al., *The RickA protein of Rickettsia conorii activates the Arp2/3 complex*. Nature, 2004. **427**(6973): p. 457-61.
2. Jeng, R.L., et al., *A Rickettsia WASP-like protein activates the Arp2/3 complex and mediates actin-based motility*. Cell Microbiol, 2004. **6**(8): p. 761-9.
3. Edgar, R.C., *MUSCLE: a multiple sequence alignment method with reduced time and space complexity*. BMC Bioinformatics, 2004. **5**: p. 113.
4. Edgar, R.C., *MUSCLE: multiple sequence alignment with high accuracy and high throughput*. Nucleic Acids Res, 2004. **32**(5): p. 1792-7.

**A**

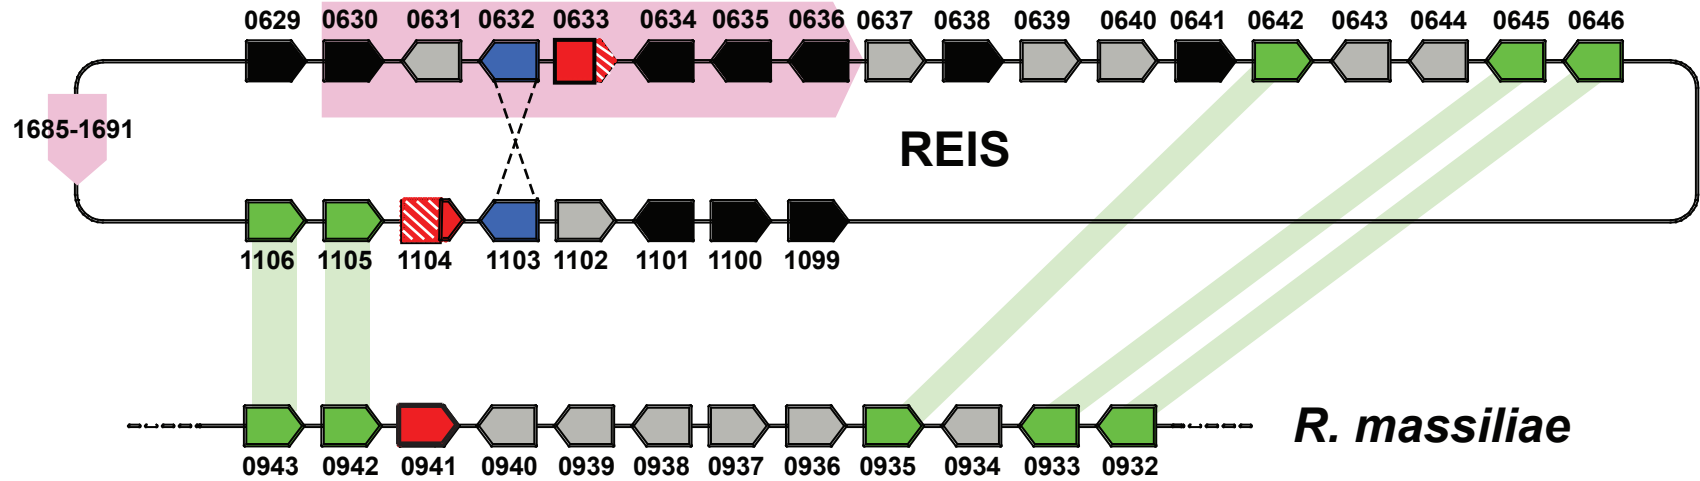

**B**

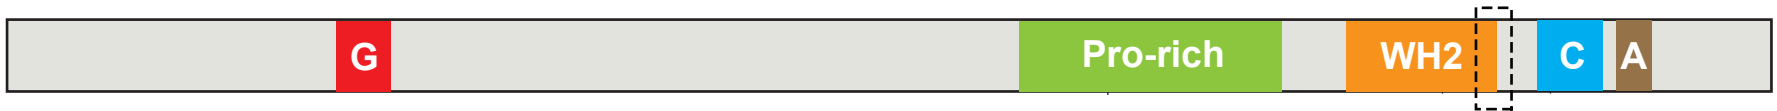

**C**

|                        | 112-127          | 343-426 | 455-500                                         | 520-537            | 547-556    |     |
|------------------------|------------------|---------|-------------------------------------------------|--------------------|------------|-----|
| <i>R. bellii</i> R     | LSVADKSGPLKQELQK | 70 (27) | TTNLMKQIQGGF-----NLKKIEY                        | DPI--IAALNKIRSAKV  | SGTDSGWASD | 518 |
| <i>R. bellii</i> O     | -----            | 0 (0)   | -----                                           | -----              | -----      | 166 |
| <i>R. canadensis</i>   | YNIVAKSAPLKQALQE | 69 (45) | TSDLMKEIVGPRNLKEVKKIDAKAQDPRDLLLQSIERGEHKLKKVEF | NKSNEIVEILARRVAME  | SDSDSGNWSD | 559 |
| <i>R. felis</i>        | YNIAEKSAPLKQELQE | 38 (20) | TSDLMREIAGPKNLRKVEKTDVKTQDSRDLLLQSIERGEHKLKKVEF | SKPNGVASILARRVAME  | SESDSGNWSD | 529 |
| <i>R. akari</i>        | YNIAAKSAPLKQELQE | 35 (17) | TSDLMREIAGPNNLRKVEKTDVKIQDSRDLLLQSIERGEHKLKKVAF | NQPNGVASILARRVAME  | SDSDSGNWSD | 523 |
| REIS_1104              | YNIAEKSAPLKQELQE | 22 (12) | TSDLMREIAGPKNLRKVEKTDVKAQDSRDLLLQSIERGEHKLKPKQF | -----              | -----      | 415 |
| REIS_0633              | -----            | 0 (0)   | -----KKVEF                                      | NKLVNGVASILARRVAME | SESDSGNWSD | 97  |
| REIS_1688              | -----            | 0 (0)   | -----KKVEF                                      | NKLVNGVASILARRVAME | SESDSGNWSD | 97  |
| <i>R. massiliae</i>    | YSIAEKSAPLKQALQA | 43 (24) | TSDLMREIVGPKKLRKVEKTDVKAQDSRDLLLQSIERGEHKLKKVEF | NKPNGVASILARRVAIE  | SESDSGNWSD | 532 |
| <i>R. raoultii</i>     | YNIAEKSAPLKQELQE | 77 (44) | TSDLMREIAGPKKLRKVEKTDVKAQDSRDLLLQSIERGEHKLKKVEF | NKPNGIASILARRVAME  | SESDSGNWSD | 565 |
| <i>R. rickettsii</i> S | YNIAEKSAPLKQALQE | 41 (29) | TSDLMREIAGPK-----KLKKVEF                        | NKPSGLESIFARRVAIE  | SESDSGNWSD | 494 |
| <i>R. rickettsii</i> I | YNIAEKSAPLKQALQE | 28 (21) | TSDLMREIAGPK-----KLKKVEF                        | NKPSGLESIFARRVAIE  | SESDSGNWSD | 481 |
| <i>R. conorii</i>      | YNIAEKSAPLKQALQE | 62 (38) | TSDLMREIAGPK-----KLKKVEF                        | NALSGLESIFARRAVIK  | SESDSGNWSD | 520 |
| <i>R. sibirica</i>     | YNIAEKSAPLKQALQE | 71 (43) | TSDLMREIAGPK-----KLKKVEF                        | NKPSGLESIFARRAAIE  | SESDSGNWSD | 526 |
| <i>R. africana</i>     | YNIAEKFAPLKQALQE | 42 (30) | TSALMREIAGPK-----KLKKVEF                        | NKPSGLESILARRIAIE  | SESDSGNWSD | 497 |
|                        | * * * * *        |         | * * * * * * * * * * * * * * * * * *             | *                  | * * * * *  |     |

**Fig. S6.** Characteristics of 50 problematic genes of *R. peacockii* str. Rustic and comparison with homologous ORFs in 15 other *Rickettsia* genomes. (A) Genes 1-25. (B) Genes 26-50. The genes were selected from Felsheim et al. [1]. Gene product annotations are listed at the top in each panel, with black illustrating proteins with top blastp hits to other *Alphaproteobacteria* sequences (vertical transmission), and green denoting top blastp hits to non-*Alphaproteobacteria* (lateral transmission). Length of query proteins is given (aa) in parentheses. Query sequences (protein IDs) from *R. rickettsii* genomes as follows, numbering 1-50: 1, A1G\_03990; 2, A1G\_03950; 3, A1G\_01175; 4, Rrlowa\_0811; 5, A1G\_03470; 6, A1G\_00265; 7, A1G\_01615; 8, A1G\_00635; 9, A1G\_00720; 10, A1G\_06270; 11, A1G\_05085; 12, A1G\_04725; 13, A1G\_07015; 14, A1G\_06990; 15, A1G\_04305; 16, A1G\_03035; 17, A1G\_02985; 18, A1G\_02790; 19, A1G\_02605; 20, A1G\_02570; 21, A1G\_00085; 22, A1G\_00090; 23, A1G\_00095; 24, A1G\_00130; 25, A1G\_00215; 26, A1G\_01245; 27, A1G\_01880; 28, A1G\_02165; 29, A1G\_02530; 30, A1G\_02820; 31, A1G\_02825; 32, A1G\_02830; 33, A1G\_03355; 34, A1G\_03530; 35, A1G\_04035; 36, A1G\_04170; 37, A1G\_04290; 38, A1G\_04355; 39, A1G\_04365; 40, A1G\_04605; 41, A1G\_04620; 42, A1G\_04660; 43, A1G\_04775; 44, A1G\_04970; 45, A1G\_04995; 46, A1G\_05000; 47, A1G\_05005/A1G\_05010; 48, A1G\_05015; 49, A1G\_05165; 50, A1G\_05855. All other information is provided at the bottom of each panel.

1. Felsheim, R.F., T.J. Kurtti, and U.G. Munderloh, *Genome sequence of the endosymbiont Rickettsia peacockii and comparison with virulent Rickettsia rickettsii: identification of virulence factors*. PLoS One, 2009. **4**(12): p. e8361.

A

■ ORFs with top blast hits to *Alphaproteobacteria* (vertical transmission)

■ ORFs with top blast hits to non-*Alphaproteobacteria* (lateral transmission)

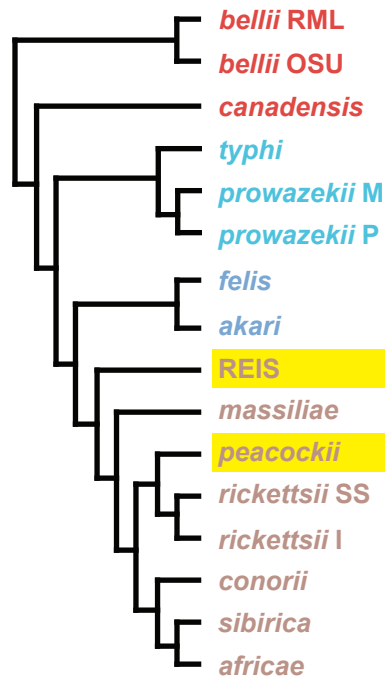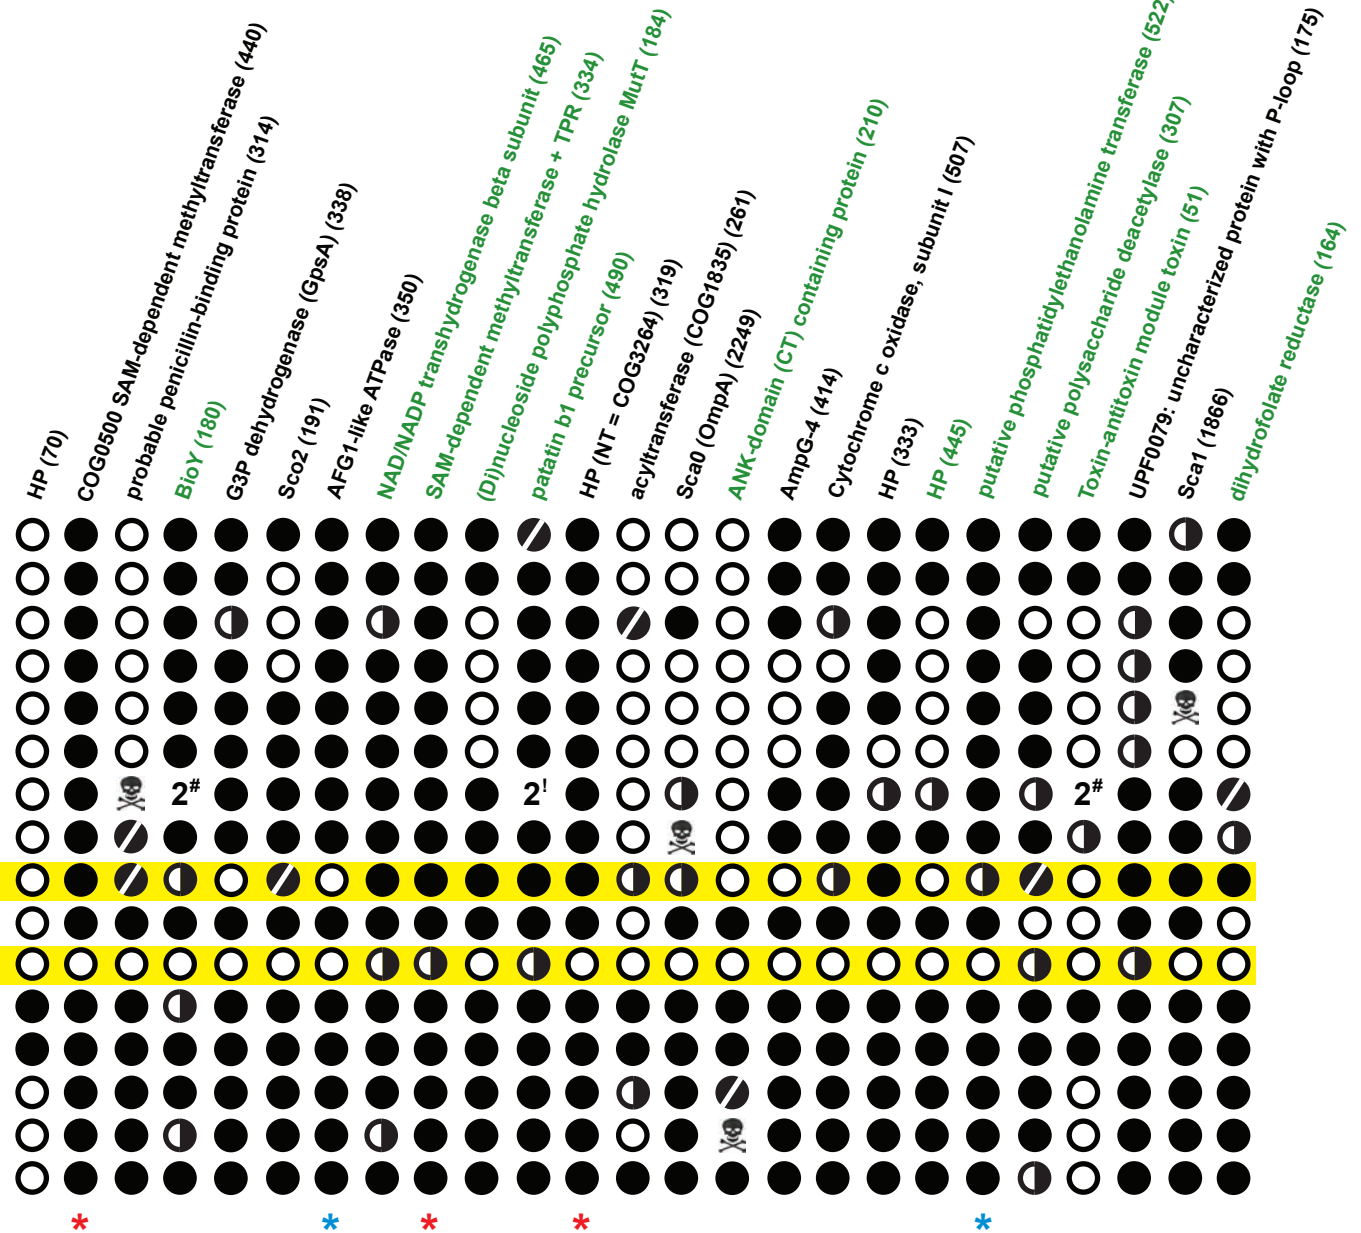

Ancestral Group  
Typhus Group  
Transitional Group  
Spotted Fever Group

● full length ORF  
○ missing ORF  
◐ truncated ORF  
◑ split ORF  
⊗ fragmented ORF

# Two full length ORFs.

† Two full length ORFs; one encoded on plasmid pRF.

\* Mutated in *R. peacockii* only

\* Mutated in *R. peacockii* and REIS

**B**

- ORFs with top blastp hits to *Alphaproteobacteria* (vertical transmission)
- ORFs with top blastp hits to non-*Alphaproteobacteria* (lateral transmission)

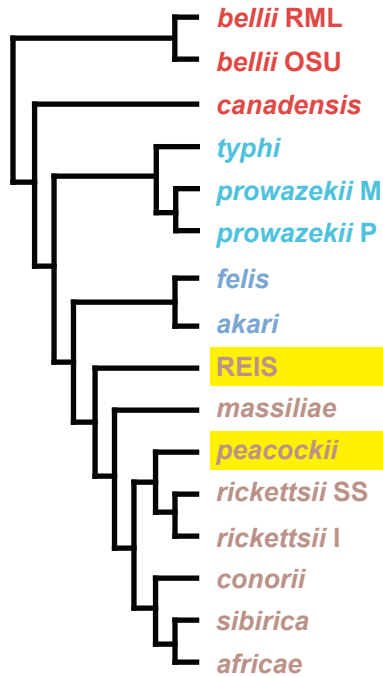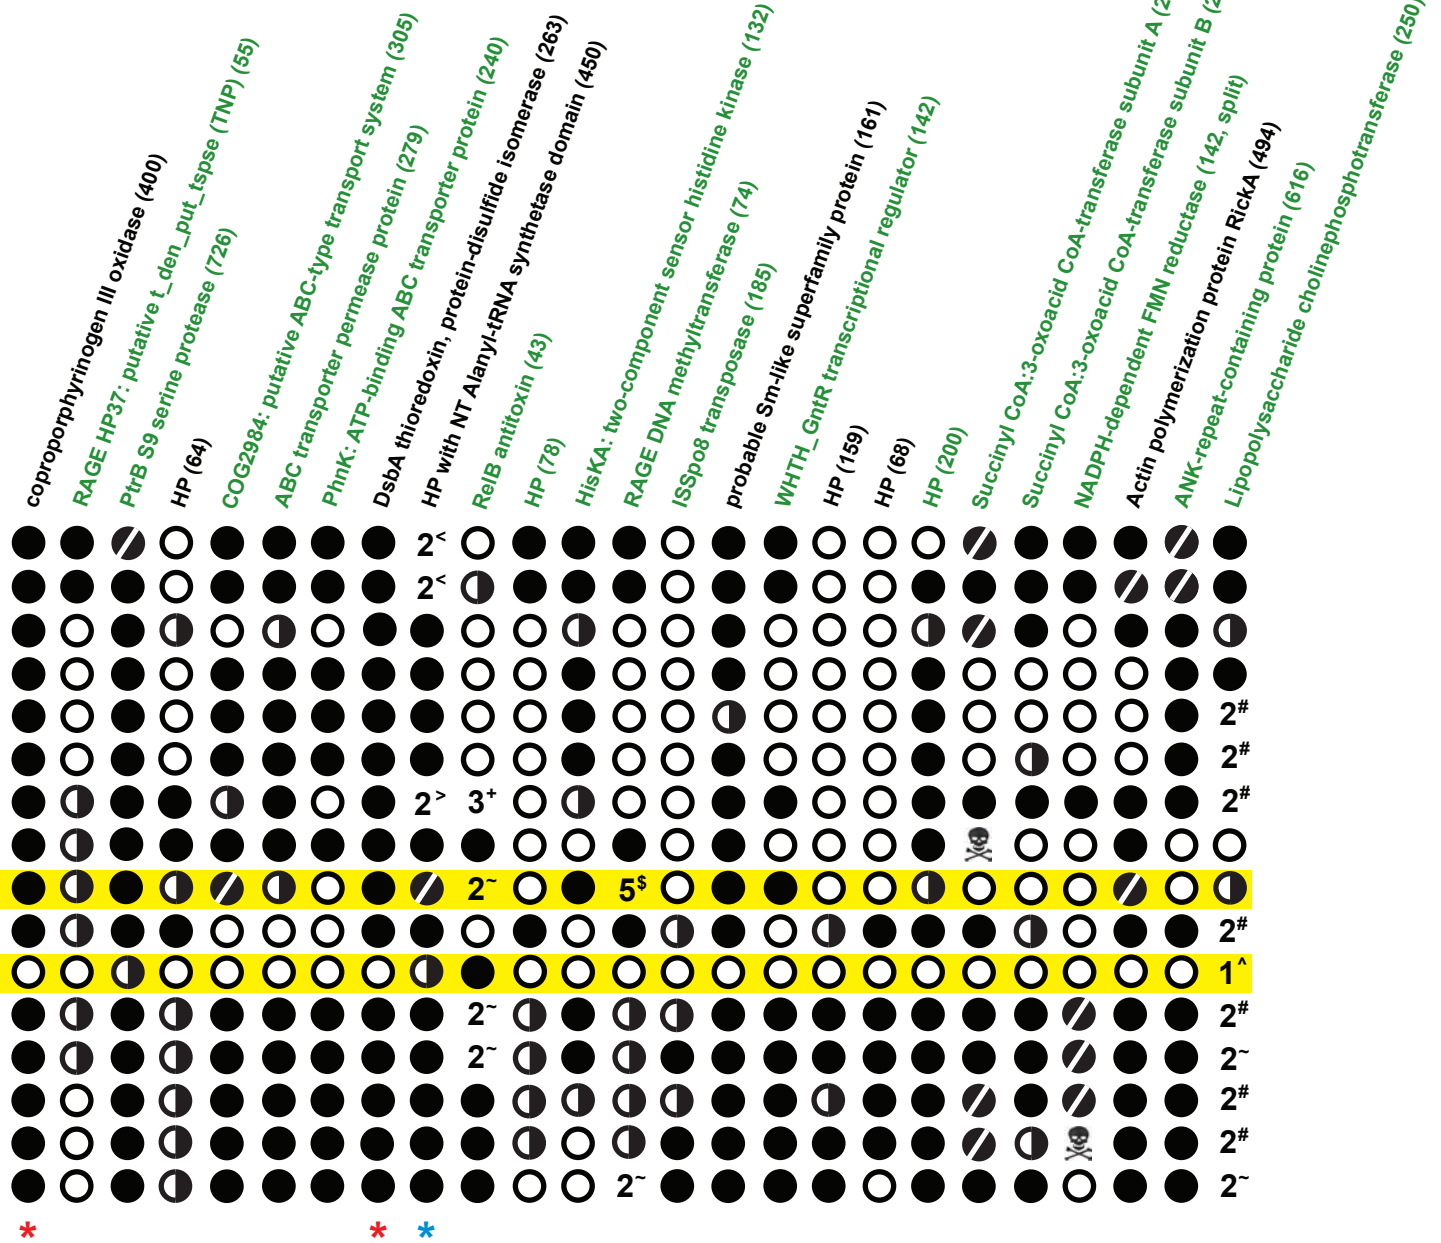

Ancestral Group  
Typhus Group  
Transitional Group  
Spotted Fever Group

- full length ORF
- missing ORF
- ◐ truncated ORF
- ◑ split ORF
- ⊗ fragmented ORF

- # Two full length ORFs.
- 1 Two full length ORFs; one encoded on plasmid pRF.
- < Two full length ORFs (one conserved, one divergent).
- > One full length ORF (divergent), one truncated.
- + Three full length ORFs.
- ~ One full length ORF, one truncated.
- § Four full length ORFs, one truncated, additional pseudogenes.
- ^ Two ORFs recombined into one.

- \* Mutated in *R. peacockii* only
- \* Mutated in *R. peacockii* and REIS

**Fig. S7.** Compilation and phylogeny estimation of 216 ISRPe1 and ISRpe1-like transposase sequences. The integrase core domain of these sequences belongs to the rve superfamily (pfam02022). All sequences share homology outside of the integrase domain, and collectively are grouped in the conserved domain PHA02517, which is not assigned to any domain superfamily. A total of 65 putative ISRpre1 sequences were retrieved using *R. peacockii* ISRpe1 as a query against the Rickettsiales database (taxid:766). Split ORFs were merged resulting in a total of 58 ISRpe1 sequences. These Rickettsiales sequences were combined with 158 blastp subjects acquired using the same query sequence against the NCBI non-redundant protein database excluding taxid:766. The total 216 ISRpe1 and ISRpe1-like sequences were aligned with MUSCLE v3.6 using default parameters [1, 2]. A phylogeny was estimated in PAUP\* v4.0b10 (Altevec) under parsimony [3]. A heuristic search was implemented employing 250 random sequence additions, saving 10 trees per replication. A majority rule consensus tree was constructed for 170 equally parsimonious trees of tree score 4458. All nodes shown on the tree were present in all 170 trees, with collapsed clades (open and filled triangles) containing nodes not present in all trees.

1. Edgar, R.C., *MUSCLE: a multiple sequence alignment method with reduced time and space complexity*. BMC Bioinformatics, 2004. **5**: p. 113.
2. Edgar, R.C., *MUSCLE: multiple sequence alignment with high accuracy and high throughput*. Nucleic Acids Res, 2004. **32**(5): p. 1792-7.
3. Swofford, D., *PAUP\*: Phylogenetic analysis using parsimony (\*and other methods)*, version 4 ed. , 1999, Sinauer: Sunderland, MA.



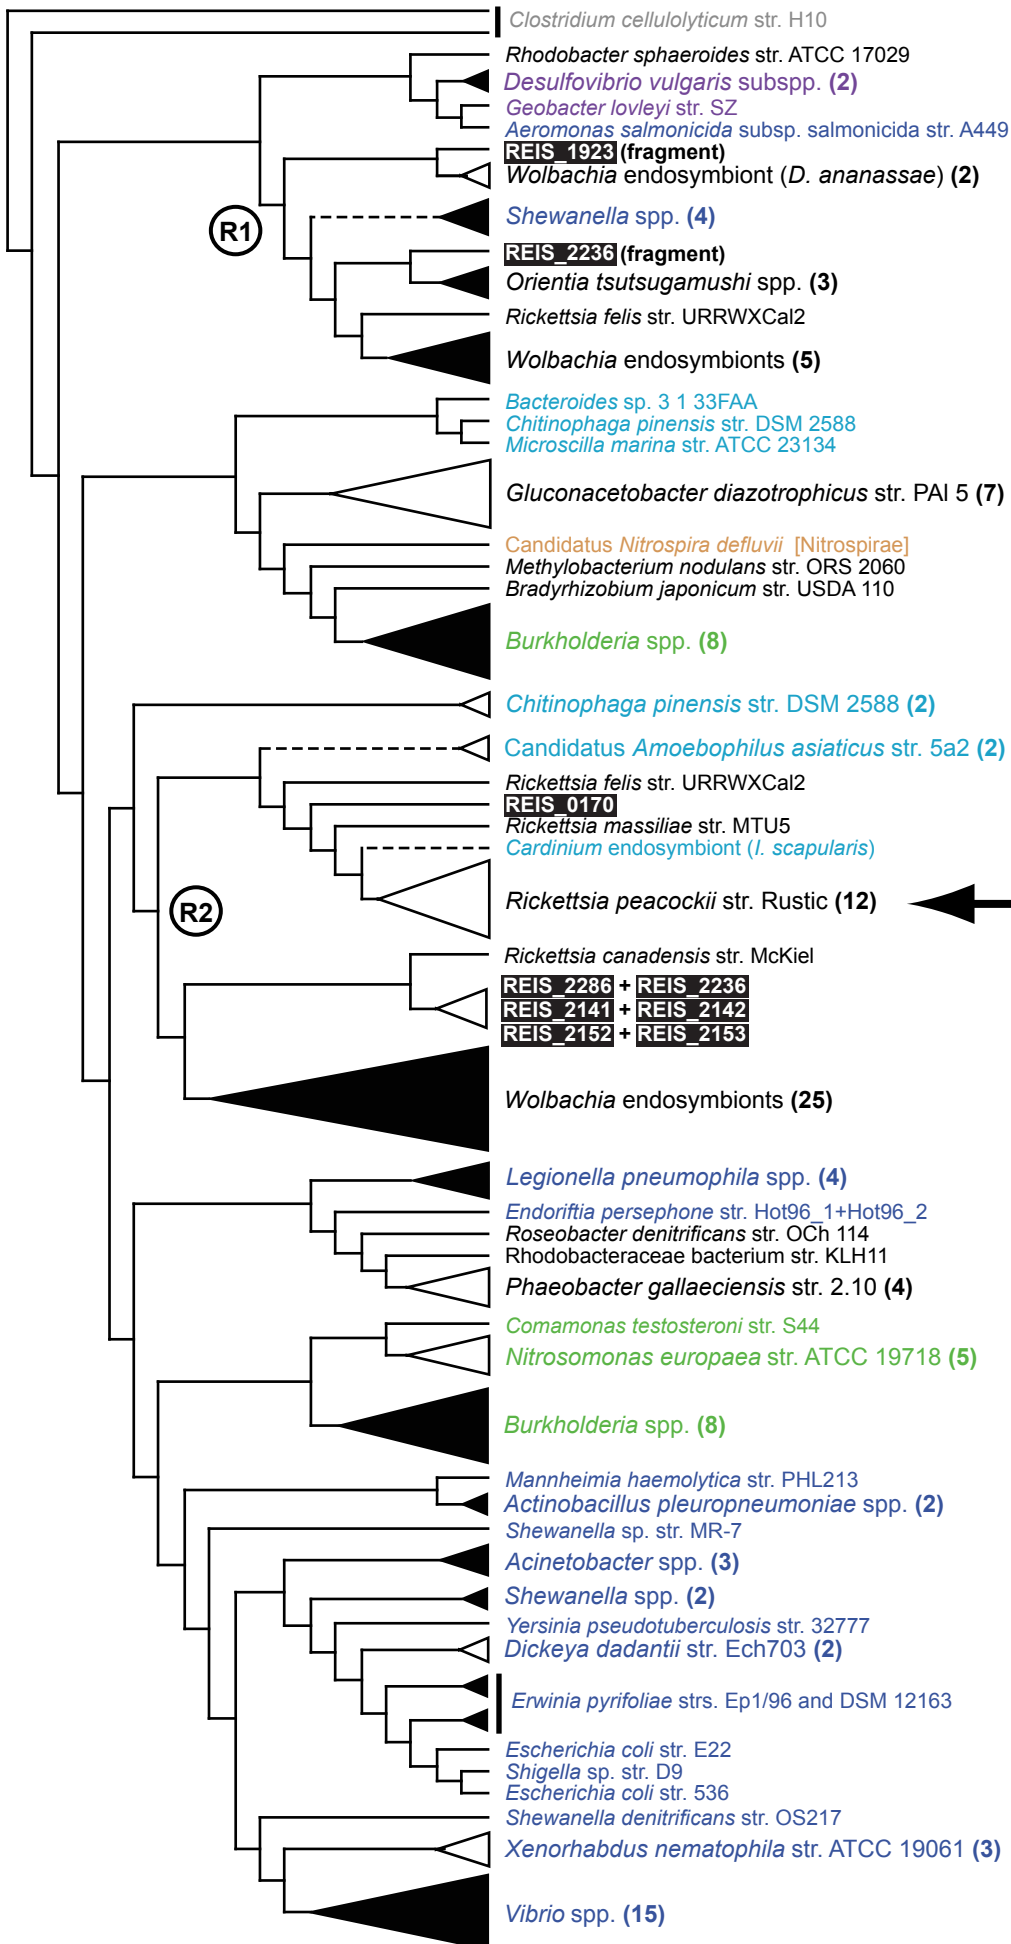

## ISRpe1

- contains rve integrase core domain (pfam02022)
- larger conserved sequences belong to CDD PHA02517, which is not assigned to any domain superfamily

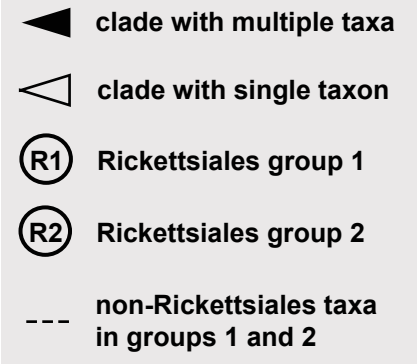

## Firmicutes

- Alphaproteobacteria**
- Deltaproteobacteria**
- Gammaproteobacteria**
- Betaproteobacteria**
- Bacteroidetes**
- other bacteria**
