# Supplementary material
Source: PubMed Central journal article supplement (PMC3256634)
Supplement: supp_194.2.376_TableS1-S11.pdf [file supp_194.2.376_TableS1-S11.pdf]

**Table S1.** List of pseudogenes and split genes determined within the REIS genome. A total of 148 pseudogenes (colored black) are present as one ORF and truncated relative to larger genes encoded within other *Rickettsia* genomes. A total of 84 split genes (colored blue) are comprised of two or more ORFs comprising 217 total fragments (avg. 2.6 fragments per split gene). For split genes, asterisks denote genes splintered by insertion sequences. All CDS are listed by coordinates for the chromosome and four plasmids.

**Chromosome**

| <b>PG</b> | <b>REIS</b>  | <b>start</b>   | <b>stop</b>    | <b>Annotation</b>                                                                                                                                   |
|-----------|--------------|----------------|----------------|-----------------------------------------------------------------------------------------------------------------------------------------------------|
| 1         | 0022<br>0023 | 2890<br>4011   | 3819<br>5072   | pyridine nucleotide-disulfide oxidoreductase family protein<br>putative bifunctional glutamate synthase subunit beta/2-polyprenylphenol hydroxylase |
| 2         | 0026         | 8729           | 8100           | acyl-[acyl-carrier-protein]-UDP-N-acetylglucosamine O-acyltransferase                                                                               |
| 3         | 0031         | 11101          | 11316          | conserved hypothetical protein, authentic frameshift                                                                                                |
| 4         | 0055         | 29465          | 29812          | guanosine polyphosphate pyrophosphohydrolase/synthetase, putative frameshift                                                                        |
| 5         | 0057         | 35356          | 31214          | outer membrane protein OmpB precursor, putative frameshift                                                                                          |
| 6         | 0060         | 39564          | 38977          | rickettsial palindromic element domain protein, putative frameshift                                                                                 |
| 7         | 0066<br>0067 | 44180<br>44529 | 43089<br>44284 | periplasmic protein<br>protein involved in external DNA uptake                                                                                      |
| 8         | 0069         | 48011          | 46347          | DNA ligase, NAD-dependent                                                                                                                           |
| 9         | 0075         | 51461          | 52192          | guanosine polyphosphate pyrophosphohydrolase/synthetase, putative frameshift                                                                        |
| 10        | 0084         | 57752          | 58498          | N-acetylmuramoyl-L-alanine amidase AmiD, authentic point mutation                                                                                   |
| 11        | 0088         | 60671          | 60024          | integrase                                                                                                                                           |
| 12        | 0094         | 66429          | 65464          | methionine adenosyltransferase, degenerate                                                                                                          |
| 13        | 0109         | 78159          | 79315          | ATPase, putative frameshift                                                                                                                         |
| 14        | 0113<br>0114 | 82378<br>83199 | 81350<br>82591 | ABC transporter ATP-binding protein Uup<br>ABC transporter ATP-binding protein Uup                                                                  |
| 15        | 0143         | 108251         | 107347         | microcin C7 resistance protein, authentic frameshift                                                                                                |
| 16        | 0145         | 111742         | 111608         | conserved hypothetical protein                                                                                                                      |
| 17        | 0151         | 115588         | 116688         | transposase, Mutator family, putative frameshift                                                                                                    |
| 18        | 0161         | 123606         | 124200         | transposase, putative point mutation                                                                                                                |
| 19        | 0173         | 135968         | 133863         | conserved hypothetical protein, putative point mutation                                                                                             |

| <b>PG</b> | <b>REIS</b>          | <b>start</b>               | <b>stop</b>                | <b>Annotation</b>                                                                                                     |
|-----------|----------------------|----------------------------|----------------------------|-----------------------------------------------------------------------------------------------------------------------|
| 20        | 0177                 | 139281                     | 138724                     | bicyclomycin resistance protein, putative frameshift                                                                  |
| 21        | 0178                 | 139737                     | 139564                     | conserved hypothetical protein                                                                                        |
| 22        | 0179<br>0180         | 141219<br>142185           | 140050<br>141723           | export ATP-binding/permease protein<br>putative export ATP-binding/permease protein                                   |
| 23        | 0183                 | 142799                     | 143401                     | queuosine biosynthesis protein QueC, putative frameshift                                                              |
| 24        | 0184                 | 143906                     | 146830                     | bacterial NAD-glutamate dehydrogenase family protein                                                                  |
| 25        | 0189                 | 148260                     | 148622                     | proline/betaine transporter                                                                                           |
| 26        | 0190                 | 149376                     | 148880                     | putative oxidoreductase protein, putative frameshift                                                                  |
| 27        | 0202<br>0203         | 155519<br>156277           | 156271<br>156591           | conserved hypothetical protein<br>conserved hypothetical protein                                                      |
| 28*       | 0204<br>0205<br>0206 | 157101<br>158280<br>158307 | 157835<br>157840<br>158654 | cell surface antigen Sca13, putative frameshift<br>transposase, putative point mutation<br>cell surface antigen Sca13 |
| 29        | 0207                 | 159075                     | 158716                     | transcriptional regulator, XRE family, putative point mutation                                                        |
| 30        | 0208                 | 159318                     | 159072                     | cytotoxic translational repressor of toxin-antitoxin system, putative frameshift                                      |
| 31        | 0214                 | 162721                     | 163302                     | nucleotidyltransferase                                                                                                |
| 32        | 0234                 | 178767                     | 176752                     | NADH-quinone oxidoreductase subunit G                                                                                 |
| 33        | 0259                 | 198424                     | 198121                     | transcriptional regulator, putative point mutation                                                                    |
| 34        | 0271                 | 220201                     | 220422                     | O-linked GlcNAc transferase                                                                                           |
| 35        | 0273                 | 222637                     | 221759                     | hydrophobe/amphiphile efflux-1 HAE1 family protein, putative point mutation                                           |
| 36        | 0309                 | 249324                     | 248421                     | conserved hypothetical protein, putative frameshift                                                                   |
| 37*       | 0326<br>0327<br>0328 | 258655<br>259939<br>260072 | 259311<br>259499<br>260293 | large extracellular alpha-helical protein<br>transposase<br>large extracellular alpha-helical protein                 |

| PG | REIS | start  | stop   | Annotation                                                       |
|----|------|--------|--------|------------------------------------------------------------------|
| 38 | 0330 | 261417 | 266090 | polyketide synthase, type I, putative frameshift                 |
| 39 | 0333 | 267551 | 267393 | conjugal transfer protein TraD                                   |
| 40 | 0340 | 271679 | 271299 | arginyl-tRNA synthetase                                          |
| 41 | 0345 | 273499 | 277559 | conjugal transfer protein TraA, putative frameshift              |
| 42 | 0347 | 280524 | 278912 | putative conjugative transfer protein TraD, authentic frameshift |
| 43 | 0367 | 292301 | 291705 | putative transcriptional regulator, putative frameshift          |
| 44 | 0386 | 308182 | 309139 | conserved hypothetical protein, putative frameshift              |
| 45 | 0407 | 325472 | 325843 | conserved hypothetical protein                                   |
|    | 0408 | 326010 | 326120 | conserved hypothetical protein                                   |
|    | 0409 | 326527 | 326988 | conserved hypothetical protein                                   |
|    | 0410 | 326985 | 327275 | conserved hypothetical protein                                   |
|    | 0411 | 327597 | 327469 | hypothetical protein                                             |
|    | 0412 | 327648 | 327854 | conserved hypothetical protein                                   |
|    | 0413 | 327890 | 328204 | conserved hypothetical protein                                   |
|    | 0414 | 328285 | 328812 | conserved hypothetical protein                                   |
| 46 | 0415 | 329038 | 329571 | conserved hypothetical protein                                   |
| 47 | 0427 | 340107 | 339667 | transposase, putative point mutation                             |
| 48 | 0433 | 344553 | 345377 | queuine synthase, putative frameshift                            |
| 49 | 0439 | 350818 | 351078 | conserved hypothetical protein                                   |
|    | 0440 | 351109 | 351315 | conserved hypothetical protein                                   |
| 50 | 0502 | 401984 | 398603 | putative cell surface antigen Sca2, authentic frameshift         |
|    | 0503 | 402833 | 402675 | hypothetical protein                                             |
|    | 0504 | 403279 | 402830 | surface antigen                                                  |
|    | 0505 | 403563 | 403673 | hypothetical protein                                             |
|    | 0506 | 403847 | 403680 | surface antigen                                                  |
| 51 | 0520 | 415006 | 413500 | conserved hypothetical protein, putative frameshift              |
| 52 | 0527 | 420444 | 419882 | polysaccharide deacetylase, degenerate                           |

| <b>PG</b> | <b>REIS</b>                  | <b>start</b>                         | <b>stop</b>                          | <b>Annotation</b>                                                                                                                                           |
|-----------|------------------------------|--------------------------------------|--------------------------------------|-------------------------------------------------------------------------------------------------------------------------------------------------------------|
| 53        | 0530                         | 422322                               | 422155                               | poly-beta-hydroxybutyrate polymerase                                                                                                                        |
| 54        | 0539<br>0541                 | 428178<br>428673                     | 428568<br>429584                     | proline/betaine transporter, putative frameshift<br>proline/betaine transporter                                                                             |
| 55        | 0543                         | 430841                               | 430482                               | hypothetical protein                                                                                                                                        |
| 56        | 0547<br>0548<br>0549         | 433656<br>435954<br>437882           | 433075<br>434160<br>437031           | DNA-directed RNA polymerase, beta' subunit<br>DNA-directed RNA polymerase, beta' subunit, putative frameshift<br>DNA-directed RNA polymerase, beta' subunit |
| 57        | 0556                         | 448589                               | 446513                               | elongation factor EF-G, putative frameshift                                                                                                                 |
| 58        | 0564                         | 455493                               | 454099                               | periplasmic serine protease, degenerate                                                                                                                     |
| 59        | 0567                         | 457518                               | 457778                               | tRNA pseudouridine synthase B                                                                                                                               |
| 60        | 0570                         | 461580                               | 460376                               | ClpB protein, degenerate                                                                                                                                    |
| 61        | 0572                         | 462237                               | 463049                               | conserved hypothetical protein, putative frameshift                                                                                                         |
| 62        | 0599                         | 476532                               | 478948                               | type IV secretion/conjugal transfer ATPase, VirB4 family, putative frameshift                                                                               |
| 63        | 0602<br>0603                 | 480377<br>483752                     | 483733<br>484097                     | TrbL/VirB6 plasmid conjugal transfer protein, degenerate<br>TrbL/VirB6a plasmid conjugal transfer protein                                                   |
| 64        | 0604                         | 484312                               | 485871                               | TrbL/VirB6 plasmid conjugative transfer protein, putative frameshift                                                                                        |
| 65        | 0607                         | 493155                               | 495758                               | TrbL/VirB6 plasmid conjugal transfer protein, authentic point mutation                                                                                      |
| 66        | 0625                         | 505078                               | 505650                               | dephospho-CoA kinase, putative point mutation                                                                                                               |
| 67        | 0631                         | 511645                               | 511544                               | beta-lactamase-like protein                                                                                                                                 |
| 68        | 0633                         | 512731                               | 512907                               | actin polymerization protein RickA (tail)                                                                                                                   |
| 69*       | 0637<br>0638<br>0639<br>0640 | 515475<br>515801<br>516276<br>516753 | 515729<br>516241<br>516647<br>517019 | conserved hypothetical protein<br>transposase<br>conserved hypothetical protein<br>conserved hypothetical protein                                           |

| <b>PG</b> | <b>REIS</b>          | <b>start</b>               | <b>stop</b>                | <b>Annotation</b>                                                                                            |
|-----------|----------------------|----------------------------|----------------------------|--------------------------------------------------------------------------------------------------------------|
| 70        | 0644                 | 521907                     | 521500                     | conserved hypothetical protein                                                                               |
| 71        | 0657                 | 531412                     | 531861                     | proline/betaine transporter, degenerate                                                                      |
| 72*       | 0667<br>0668<br>0669 | 538885<br>538896<br>539692 | 538535<br>539024<br>539387 | ankyrin repeat-containing domain protein<br>hypothetical protein<br>ankyrin repeat-containing domain protein |
| 73        | 0673<br>0674         | 541406<br>542690           | 542585<br>542929           | conserved hypothetical protein, putative frameshift<br>conserved hypothetical protein                        |
| 74        | 0692                 | 554476                     | 555479                     | AmpG, authentic frameshift                                                                                   |
| 75        | 0694<br>0695         | 556731<br>557930           | 556850<br>557056           | hypothetical protein<br>rare lipoprotein A, putative frameshift                                              |
| 76        | 0709                 | 568597                     | 569619                     | conserved hypothetical protein, putative frameshift                                                          |
| 77        | 0712                 | 574125                     | 575249                     | conserved hypothetical protein, degenerate                                                                   |
| 78        | 0715                 | 578346                     | 577825                     | conserved hypothetical protein, putative frameshift                                                          |
| 79        | 0728                 | 590306                     | 589386                     | glycerol-3-phosphate dehydrogenase, authentic frameshift                                                     |
| 80        | 0739<br>0740         | 600219<br>600498           | 600431<br>600740           | cytochrome b561<br>cytochrome b561 family protein                                                            |
| 81        | 0779                 | 633814                     | 634113                     | conserved hypothetical protein                                                                               |
| 82        | 0824                 | 669611                     | 666892                     | putative conjugative transfer protein TraG, degenerate                                                       |
| 83        | 0826                 | 671711                     | 671016                     | F pilus assembly protein TraF, degenerate                                                                    |
| 84        | 0827                 | 673658                     | 671955                     | conjugative transfer protein TraN, degenerate                                                                |
| 85        | 0832                 | 677994                     | 676042                     | conjugative transfer protein TraC, authentic frameshift                                                      |
| 86        | 0883                 | 727428                     | 729938                     | conjugative transfer protein TraC, authentic point mutation                                                  |

| <b>PG</b> | <b>REIS</b>                  | <b>start</b>                         | <b>stop</b>                          | <b>Annotation</b>                                                                                                                                |
|-----------|------------------------------|--------------------------------------|--------------------------------------|--------------------------------------------------------------------------------------------------------------------------------------------------|
| 87*       | 0888<br>0889<br>0890         | 732396<br>733457<br>733638           | 733007<br>733017<br>734674           | conjugative transfer protein TraN, interruption-N<br>transposase<br>conjugative transfer protein TraN, putative frameshift                       |
| 88        | 0891                         | 734825                               | 735585                               | F pilus assembly protein TraF, putative frameshift                                                                                               |
| 89*       | 0893<br>0894<br>0895         | 736998<br>739958<br>740048           | 739513<br>739518<br>740254           | conjugative transfer protein TraG, authentic frameshift<br>transposase<br>conjugative transfer protein TraG                                      |
| 90        | 0899                         | 747846                               | 743704                               | conjugal transfer protein TraA, degenerate                                                                                                       |
| 91        | 0937                         | 781877                               | 781473                               | conserved hypothetical protein                                                                                                                   |
| 92        | 0942                         | 788813                               | 788349                               | ABC transporter permease protein                                                                                                                 |
| 93*       | 0945<br>0946<br>0947         | 790553<br>790653<br>791393           | 790425<br>791093<br>791196           | ABC transporter substrate-binding protein<br>transposase<br>ABC transporter substrate-binding protein                                            |
| 94*       | 0958<br>0959<br>0960<br>0961 | 801226<br>802252<br>802787<br>803125 | 800873<br>801314<br>802368<br>802988 | putative phage terminase protein<br>transposase<br>phage uncharacterized protein<br>conserved hypothetical protein                               |
| 95        | 0989<br>0990<br>0991<br>0992 | 820268<br>820720<br>821166<br>821537 | 819960<br>820232<br>820780<br>821181 | conserved hypothetical protein<br>putative hemagglutinin protein, putative point mutation<br>conserved hypothetical protein<br>YD repeat protein |
| 96        | 0993                         | 821647                               | 824139                               | AsmA family protein, putative point mutation                                                                                                     |
| 97*       | 1006<br>1007<br>1008         | 833733<br>835259<br>835373           | 834480<br>834717<br>835621           | efflux transporter, RND family, MFP subunit, putative frameshift<br>ISPg3, transposase<br>efflux transporter, RND family, MFP subunit            |
| 98        | 1011                         | 839731                               | 838397                               | conserved hypothetical protein, putative point mutation                                                                                          |
| 99        | 1015                         | 843052                               | 842930                               | transglycosylase SLT family protein                                                                                                              |
| 100       | 1017                         | 843604                               | 845171                               | integral membrane protein, putative frameshift                                                                                                   |

| <b>PG</b> | <b>REIS</b>                  | <b>start</b>                         | <b>stop</b>                          | <b>Annotation</b>                                                                                                                      |
|-----------|------------------------------|--------------------------------------|--------------------------------------|----------------------------------------------------------------------------------------------------------------------------------------|
| 101       | 1024                         | 849009                               | 850034                               | putative DNA processing protein DprA, putative frameshift                                                                              |
| 102       | 1027                         | 853926                               | 853810                               | proline/betaine transporter                                                                                                            |
| 103       | 1034<br>1035                 | 858337<br>858645                     | 857894<br>858412                     | conserved hypothetical protein<br>conserved hypothetical protei                                                                        |
| 104       | 1036                         | 859092                               | 858946                               | protein CyaY                                                                                                                           |
| 105*      | 1037<br>1038<br>1039         | 859803<br>860273<br>860856           | 859228<br>859833<br>860296           | aminodeoxychorismate lyase<br>transposase<br>aminodeoxychorismate lyase                                                                |
| 106       | 1043<br>1044<br>1045         | 863384<br>863583<br>863833           | 863193<br>863461<br>863576           | conserved hypothetical protein<br>conserved hypothetical protein<br>conserved hypothetical protein                                     |
| 107       | 1046<br>1047                 | 864135<br>865301                     | 863959<br>864105                     | ChII<br>competence protein ComM, putative frameshift                                                                                   |
| 108       | 1070                         | 885202                               | 883424                               | penicillin-binding protein, putative frameshift                                                                                        |
| 109       | 1074                         | 888963                               | 888841                               | proline/betaine transporter                                                                                                            |
| 110       | 1082                         | 902823                               | 902262                               | guanosine polyphosphate pyrophosphohydrolase/synthetase, putative frameshift                                                           |
| 111       | 1097                         | 920925                               | 924963                               | conjugal transfer protein TraA, putative frameshift                                                                                    |
| 112       | 1104                         | 931137                               | 929890                               | rickA                                                                                                                                  |
| 113*      | 1109<br>1110<br>1111         | 939572<br>940372<br>941258           | 937573<br>939932<br>940395           | transcription-repair-coupling factor, putative frameshift<br>transposase<br>transcription-repair-coupling factor                       |
| 114       | 1125<br>1126<br>1127<br>1128 | 949651<br>950254<br>951435<br>951655 | 950001<br>950985<br>950995<br>952047 | conserved hypothetical protein, putative frameshift<br>conserved hypothetical protein<br>transposase<br>conserved hypothetical protein |
| 115       | 1138                         | 971566                               | 969993                               | succinate-semialdehyde dehydrogenase, degenerate                                                                                       |

| <b>PG</b> | <b>REIS</b> | <b>start</b> | <b>stop</b> | <b>Annotation</b>                                   |
|-----------|-------------|--------------|-------------|-----------------------------------------------------|
| 116       | 1144        | 975684       | 975088      | 2-hydroxy-6-oxo-6-phenylhexa-2,4-dienoate hydrolase |
| 117       | 1151        | 981192       | 980086      | nacht domain protein, authentic point mutation      |
| 118       | 1152        | 982500       | 981238      | transposase, putative frameshift                    |
| 119       | 1153        | 984420       | 984022      | delta-aminolevulinic acid dehydratase               |
|           | 1155        | 985377       | 984525      | delta-aminolevulinic acid dehydratase               |
| 120*      | 1157        | 986931       | 987197      | conserved hypothetical protein                      |
|           | 1158        | 987250       | 987669      | putative transposase                                |
|           | 1159        | 988781       | 989014      | hypothetical protein                                |
|           | 1161        | 989102       | 989530      | conserved hypothetical protein                      |
| 121       | 1167        | 996987       | 996527      | amino acid permease, degenerate                     |
| 122       | 1174        | 1004738      | 1006015     | transposase, Mutator family, putative frameshift    |
| 123       | 1183        | 1010230      | 1010431     | conserved hypothetical protein, putative frameshift |
| 124*      | 1185        | 1011929      | 1011276     | conserved hypothetical protein                      |
|           | 1186        | 1011979      | 1012392     | transposase                                         |
|           | 1187        | 1014026      | 1013417     | conserved hypothetical protein                      |
| 125       | 1205        | 1030075      | 1029989     | integration host factor beta subunit                |
| 126       | 1216        | 1040216      | 1039905     | conserved hypothetical protein                      |
|           | 1217        | 1040475      | 1040206     | conserved hypothetical protein                      |
| 127       | 1218        | 1040730      | 1040611     | conserved hypothetical protein                      |
|           | 1219        | 1041092      | 1040727     | conserved hypothetical protein                      |
| 128       | 1220        | 1041685      | 1041107     | conserved hypothetical protein, putative frameshift |
| 129*      | 1232        | 1047332      | 1047604     | biotin-protein ligase                               |
|           | 1231        | 1047887      | 1047597     | transposase subunit                                 |
|           | 1233        | 1048200      | 1047838     | transposase                                         |
|           | 1234        | 1048664      | 1048248     | transposase                                         |
|           | 1235        | 1048728      | 1049297     | putative biotin-protein ligase                      |
| 130       | 1245        | 1059921      | 1060046     | transglycosylase SLT family protein                 |

| PG   | REIS                                                         | start                                                                                | stop                                                                                 | Annotation                                                                                                                                                                       |
|------|--------------------------------------------------------------|--------------------------------------------------------------------------------------|--------------------------------------------------------------------------------------|----------------------------------------------------------------------------------------------------------------------------------------------------------------------------------|
| 131  | 1246                                                         | 1061542                                                                              | 1060132                                                                              | guanosine pentaphosphate phosphohydrolase, putative frameshift                                                                                                                   |
| 132  | 1247<br>2294                                                 | 1062655<br>1063366                                                                   | 1061552<br>1062858                                                                   | VirD4 protein<br>Vir D4 protein                                                                                                                                                  |
| 133  | 2295                                                         | 1064706                                                                              | 1063702                                                                              | VirB11 protein                                                                                                                                                                   |
| 134  | 1248                                                         | 1065049                                                                              | 1064921                                                                              | VirB9 protein precursor                                                                                                                                                          |
| 135  | 1251                                                         | 1066438                                                                              | 1067136                                                                              | VirB8 protein                                                                                                                                                                    |
| 136  | 1253                                                         | 1068102                                                                              | 1068428                                                                              | multisubunit Na <sup>+</sup> /H <sup>+</sup> antiporter, MnhC subunit                                                                                                            |
| 137  | 1257                                                         | 1072200                                                                              | 1072583                                                                              | toxin of toxin-antitoxin system VapC, putative frameshift                                                                                                                        |
| 138  | 1267                                                         | 1085096                                                                              | 1085275                                                                              | AmpG                                                                                                                                                                             |
| 139* | 1296<br>1298<br>1299<br>1300<br>1301<br>1303<br>1302<br>1304 | 1111569<br>1112180<br>1112370<br>1112645<br>1113109<br>1113476<br>1114134<br>1114463 | 1111186<br>1111740<br>1112203<br>1113061<br>1113471<br>1113775<br>1113712<br>1114131 | conserved hypothetical protein<br>transposase<br>conserved domain protein<br>transposase<br>transposase<br>transposase<br>putative transposase<br>conserved hypothetical protein |
| 140  | 1307<br>1308                                                 | 1115592<br>1116445                                                                   | 1116230<br>1116663                                                                   | exported protein<br>exported protein                                                                                                                                             |
| 141  | 1318<br>1319<br>1320                                         | 1126763<br>1127026<br>1127135                                                        | 1126233<br>1126838<br>1127028                                                        | conserved hypothetical protein<br>conserved hypothetical protein<br>hypothetical protein                                                                                         |
| 142  | 1351                                                         | 1153601                                                                              | 1154401                                                                              | conserved hypothetical protein, putative frameshift                                                                                                                              |
| 143  | 1409                                                         | 1202892                                                                              | 1203548                                                                              | putative polyketide synthase PksJ                                                                                                                                                |
| 144  | 1414                                                         | 1210248                                                                              | 1206187                                                                              | conjugal transfer protein TraA, putative frameshift                                                                                                                              |
| 145  | 1416                                                         | 1211606                                                                              | 1212139                                                                              | transposase subunit, putative frameshift                                                                                                                                         |

| <b>PG</b> | <b>REIS</b>                  | <b>start</b>                             | <b>stop</b>                              | <b>Annotation</b>                                                                                                 |
|-----------|------------------------------|------------------------------------------|------------------------------------------|-------------------------------------------------------------------------------------------------------------------|
| 146       | 1432                         | 1223441                                  | 1222682                                  | nucleotidyltransferase, putative frameshift                                                                       |
| 147       | 1439                         | 1229785                                  | 1229663                                  | AmpG                                                                                                              |
| 148       | 1440<br>1441                 | 1230215<br>1232764                       | 1229778<br>1230920                       | DNA gyrase subunit B<br>DNA gyrase subunit B, putative frameshift                                                 |
| 149       | 1446                         | 1239404                                  | 1238721                                  | F pilus assembly protein TraH, putative point mutation                                                            |
| 150       | 1459<br>1460                 | 1247586<br>1248325                       | 1248314<br>1248642                       | tRNA delta(2)-isopentenylpyrophosphate transferase<br>tRNA delta(2)-isopentenylpyrophosphate transferase          |
| 151       | 1464<br>1465                 | 1253618<br>1253871                       | 1253265<br>1253764                       | conserved hypothetical protein<br>conserved hypothetical protein                                                  |
| 152       | 1467                         | 1256345                                  | 1256190                                  | chitin binding domain protein                                                                                     |
| 153       | 1470                         | 1257465                                  | 1258464                                  | thioredoxin reductase, putative frameshift                                                                        |
| 154*      | 1476<br>1477<br>1478         | 1263049<br>1263710<br>1263776            | 1263495<br>1263522<br>1264726            | conserved hypothetical protein<br>hypothetical protein<br>conserved hypothetical protein                          |
| 155       | 1484                         | 1270703                                  | 1269393                                  | proline/betaine transporter, putative point mutation                                                              |
| 156       | 1487                         | 1271672                                  | 1275763                                  | conjugal transfer protein TraA, putative frameshift                                                               |
| 157       | 1510                         | 1304170                                  | 1301971                                  | conjugative transfer protein TraG, putative frameshift                                                            |
| 158       | 1519                         | 1314437                                  | 1312947                                  | F pilus assembly protein TraB, putative point mutation                                                            |
| 159       | 1541                         | 1329944                                  | 1329567                                  | conserved hypothetical protein                                                                                    |
| 160       | 1549<br>1550<br>1551         | 1337470<br>1338050<br>1339016            | 1338003<br>1338982<br>1339171            | conserved hypothetical protein<br>conserved hypothetical protein<br>conserved hypothetical protein                |
| 161*      | 1552<br>1553<br>1554<br>1555 | 1339481<br>1339675<br>1339856<br>1340546 | 1339173<br>1339523<br>1340296<br>1340301 | site-specific DNA adenine methylase<br>hypothetical protein<br>transposase<br>site-specific DNA adenine methylase |

| PG   | REIS | start   | stop    | Annotation                                                                       |
|------|------|---------|---------|----------------------------------------------------------------------------------|
| 162  | 1565 | 1355222 | 1354479 | protein TraD                                                                     |
|      | 1566 | 1356183 | 1355212 | conjugative transfer protein                                                     |
| 163  | 1587 | 1375610 | 1375729 | DNA polymerase III subunit epsilon                                               |
|      | 1588 | 1375732 | 1376487 | DNA polymerase III subunit epsilon                                               |
| 164  | 1598 | 1381995 | 1382717 | guanosine polyphosphate pyrophosphohydrolase/synthetase, putative point mutation |
| 165  | 1638 | 1421523 | 1422830 | citrate synthase                                                                 |
| 166  | 1639 | 1422940 | 1423932 | putative GTP-binding protein, putative frameshift                                |
| 167  | 1661 | 1441229 | 1441930 | putative permease                                                                |
| 168  | 1664 | 1443392 | 1442667 | succinyl-diaminopimelate desuccinylase                                           |
|      | 1665 | 1444123 | 1443898 | putative succinyl-diaminopimelate desuccinylase                                  |
| 169  | 1666 | 1444603 | 1444124 | type I restriction-modification enzyme, S subunit                                |
| 170  | 1688 | 1459554 | 1459378 | actin polymerization protein RickA                                               |
| 171  | 1690 | 1460640 | 1460741 | beta-lactamase-like protein                                                      |
| 172  | 1701 | 1470905 | 1468119 | 2-oxoglutarate dehydrogenase E1 component, putative frameshift                   |
| 173* | 1702 | 1471738 | 1471250 | thermostable carboxypeptidase 1                                                  |
|      | 1703 | 1472756 | 1471818 | transposase                                                                      |
|      | 1704 | 1473694 | 1473182 | CtaQ                                                                             |
| 174  | 1717 | 1489404 | 1488271 | proline/betaine transporter, putative point mutation                             |
| 175  | 1735 | 1504656 | 1504195 | bicyclomycin resistance protein                                                  |
|      | 1736 | 1505986 | 1505723 | bicyclomycin resistance protein, putative frameshift                             |
| 176  | 1767 | 1527428 | 1526568 | dipeptidyl peptidase family member 6                                             |
|      | 1768 | 1528374 | 1528237 | dipeptidyl aminopeptidase/acylaminoacyl-peptidase                                |
| 177  | 1777 | 1536769 | 1537140 | ankyrin repeat-containing domain protein                                         |
|      | 1778 | 1537273 | 1537494 | conserved hypothetical protein                                                   |

| <b>PG</b> | <b>REIS</b> | <b>start</b> | <b>stop</b> | <b>Annotation</b>                                                |
|-----------|-------------|--------------|-------------|------------------------------------------------------------------|
| 178*      | 1781        | 1541450      | 1541617     | conserved domain protein                                         |
|           | 1782        | 1542162      | 1541722     | transposase                                                      |
|           | 1783        | 1542824      | 1542270     | transposase, IS4 family                                          |
|           | 1784        | 1543665      | 1543817     | conserved hypothetical protein                                   |
| 179       | 1796        | 1555129      | 1556106     | signal transduction histidine kinase, degenerate                 |
| 180       | 1803        | 1560216      | 1560365     | hypothetical protein                                             |
|           | 1805        | 1560588      | 1562657     | tetratricopeptide repeat-containing protein                      |
| 181       | 1813        | 1567638      | 1569128     | F pilus assembly protein TraB, authentic point mutation          |
| 182       | 1820        | 1579002      | 1578667     | conserved hypothetical protein                                   |
|           | 1821        | 1580019      | 1579135     | conserved hypothetical protein                                   |
| 183       | 1887        | 1625991      | 1626968     | glycosyltransferase, putative frameshift                         |
| 184       | 1890        | 1631863      | 1630605     | transposase, Mutator family, putative frameshift                 |
| 185       | 1893        | 1632197      | 1632385     | conserved hypothetical protein                                   |
| 186       | 1903        | 1640821      | 1640474     | acetate kinase                                                   |
| 187       | 1927        | 1659654      | 1659259     | MFS type sugar transporter, putative frameshift                  |
| 188*      | 1955        | 1682366      | 1682482     | putative ankyrin repeat protein                                  |
|           | 1956        | 1682554      | 1682994     | transposase                                                      |
|           | 1957        | 1683053      | 1683181     | ankyrin repeat-containing domain protein                         |
| 189       | 1981        | 1706324      | 1708571     | tetratricopeptide repeat-containing protein, putative frameshift |
| 190       | 2005        | 1725489      | 1725716     | cytochrome c oxidase Cu                                          |
|           | 2006        | 1725721      | 1725957     | cytochrome c oxidase Cu                                          |
| 191       | 2025        | 1739817      | 1740623     | valyl-tRNA synthetase                                            |
|           | 2026        | 1740942      | 1742429     | valyl-tRNA synthetase                                            |
| 192       | 2037        | 1752788      | 1752468     | phospholipase D                                                  |
| 193       | 2038        | 1754326      | 1753116     | poly-beta-hydroxybutyrate polymerase, putative frameshift        |

| <b>PG</b> | <b>REIS</b>  | <b>start</b>       | <b>stop</b>        | <b>Annotation</b>                                                                                                                |
|-----------|--------------|--------------------|--------------------|----------------------------------------------------------------------------------------------------------------------------------|
| 194       | 2041<br>2042 | 1758865<br>1762359 | 1758008<br>1759074 | outer membrane protein OmpA<br>outer membrane protein A                                                                          |
| 195       | 2059         | 1779094            | 1779198            | AmpG                                                                                                                             |
| 196       | 2064<br>2065 | 1781464<br>1781687 | 1780742<br>1781550 | conserved hypothetical protein<br>conserved hypothetical protein                                                                 |
| 197       | 2085         | 1795881            | 1797076            | multidrug resistance protein B, putative frameshift                                                                              |
| 198       | 2095<br>2096 | 1806235<br>1806417 | 1806366<br>1806653 | conserved hypothetical protein<br>conserved hypothetical protein                                                                 |
| 199       | 2099<br>2100 | 1807618<br>1807882 | 1807782<br>1808349 | guanosine polyphosphate pyrophosphohydrolases/synthetase-like protein<br>guanosine polyphosphate pyrophosphohydrolase/synthetase |
| 200       | 2101         | 1808600            | 1809017            | conserved hypothetical protein, putative point mutation                                                                          |
| 201       | 0007         | 1812555            | 1813086            | conserved hypothetical protein, putative frameshift                                                                              |

***Plasmid pREIS1***

| <b>PG</b> | <b>REIS</b>  | <b>start</b>   | <b>stop</b>    | <b>Annotation</b>                                                                     |
|-----------|--------------|----------------|----------------|---------------------------------------------------------------------------------------|
| 202       | 2108         | 5937           | 3436           | type I restriction-modification system methyltransferase subunit, putative frameshift |
| 203       | 2127         | 23021          | 24868          | conjugative transfer protein TraN, putative point mutation                            |
| 204       | 2129         | 25864          | 27042          | F pilus assembly protein TraH, putative frameshift                                    |
| 205       | 2130         | 27182          | 29740          | conjugative transfer protein TraG, putative frameshift                                |
| 206       | 2141<br>2142 | 35574<br>36097 | 36044<br>36633 | transposase<br>transposase                                                            |
| 207       | 2152<br>2153 | 43106<br>43632 | 43579<br>44168 | transposase<br>transposase                                                            |
| 208       | 2156         | 46338          | 45757          | DNA polymerase IV, putative frameshift                                                |

**Plasmid pREIS2**

| <b>PG</b> | <b>REIS</b>  | <b>start</b>   | <b>stop</b>    | <b>Annotation</b>                                          |
|-----------|--------------|----------------|----------------|------------------------------------------------------------|
| 209       | 2174         | 9330           | 8803           | transposase, Mutator family, putative frameshift           |
| 210       | 2185         | 17796          | 17969          | ATP-dependent protease La, bacterial type                  |
| 211       | 2202         | 30154          | 29981          | ATP-dependent protease La, bacterial type                  |
| 212       | 2238<br>2239 | 62525<br>62838 | 62022<br>62569 | helicase RecD/TraA<br>conjugative transfer protein TraA_Ti |

**Plasmid pREIS3**

| <b>PG</b> | <b>REIS</b>  | <b>start</b>   | <b>stop</b>    | <b>Annotation</b>                                      |
|-----------|--------------|----------------|----------------|--------------------------------------------------------|
| 213       | 2261<br>2262 | 17713<br>18824 | 18840<br>19279 | tetratricopeptide TPR_2<br>O-linked GlcNAc transferase |
| 214       | 2286<br>2287 | 45217<br>45728 | 44561<br>45318 | transposase<br>transposase                             |

**Plasmid pREIS4**

| <b>PG</b> | <b>REIS</b> | <b>start</b> | <b>stop</b>  | <b>Annotation</b>                                          |
|-----------|-------------|--------------|--------------|------------------------------------------------------------|
| 215       | 1<br>2      | 157<br>466   | 381<br>594   | hypothetical protein<br>hypothetical protein               |
| 216       | 3<br>4      | 608<br>1093  | 997<br>1557  | transposase<br>transposase                                 |
| 217       | 5<br>6      | 1584<br>1963 | 1943<br>2112 | hypothetical protein<br>conserved hypothetical protein     |
| 218       | 8<br>9      | 3573<br>4203 | 2842<br>3607 | proline/betaine transporter<br>proline/betaine transporter |
| 219       | 17<br>18    | 7945<br>8273 | 7751<br>8031 | putative transposase<br>putative transposase               |
| 220       | 19<br>20    | 8590<br>9053 | 8432<br>8826 | putative transposase<br>putative transposase               |

| <b>PG</b> | <b>REIS</b> | <b>start</b>   | <b>stop</b>    | <b>Annotation</b>                                          |
|-----------|-------------|----------------|----------------|------------------------------------------------------------|
| 221       | 21          | 9967           | 9506           | conserved hypothetical protein                             |
| 222       | 25          | 11939          | 12118          | conserved hypothetical protein                             |
| 223       | 27<br>28    | 14981<br>15444 | 15208<br>15602 | putative transposase<br>putative transposase               |
| 224       | 29<br>30    | 15761<br>16089 | 16003<br>16283 | putative transposase<br>putative transposase               |
| 225       | 41<br>42    | 22072<br>22451 | 21923<br>22092 | hypothetical protein<br>hypothetical protein               |
| 226       | 43<br>44    | 22942<br>23427 | 22478<br>23038 | transposase<br>transposase                                 |
| 227       | 45<br>46    | 23569<br>23878 | 23441<br>23654 | hypothetical protein<br>hypothetical protein               |
| 228       | 47<br>48    | 24082<br>24593 | 23966<br>24075 | hypothetical protein<br>putative resolvase                 |
| 229       | 52<br>53    | 26122<br>26414 | 26316<br>26707 | putative resolvase<br>putative resolvase                   |
| 230       | 54<br>55    | 27212<br>27577 | 27550<br>27930 | hypothetical protein<br>hypothetical protein               |
| 231       | 56<br>57    | 28673<br>29266 | 28008<br>28742 | transposase, Mutator family<br>transposase, Mutator family |
| 232       | 64<br>65    | 33474<br>33783 | 33698<br>33911 | hypothetical protein<br>hypothetical protein               |

**Table S2.** Possible locations of 18 REIS ORFs and two tRNA genes missing from the core Rickettsiaceae (12) and *Rickettsia* (6) genomes.

| <b>ORF<sup>A,B</sup></b>          | <b>Coordinates</b> | <b>Description<sup>C,D,E</sup></b>                                                                                                                                                                                                                                                                                                                                                                                                                              |
|-----------------------------------|--------------------|-----------------------------------------------------------------------------------------------------------------------------------------------------------------------------------------------------------------------------------------------------------------------------------------------------------------------------------------------------------------------------------------------------------------------------------------------------------------|
| HP (DUF2532) <sup>#</sup>         | 121012-121180      | Flanked by HP (REIS_0158) and TNP (REIS_0159). Likely recombination with breakpoint at 237491-238024. <b>Detected as a probable frameshift in tblastn analysis.</b>                                                                                                                                                                                                                                                                                             |
| ClpX*, RimJ <sup>#</sup>          | 143402-143905      | Within G18. Gap flanked by ExsB (REIS_0183, frameshift) and duplicated region (REIS_0184-REIS_0189). Reciprocal duplicated region encoded by REIS_0126-REIS_0131, coordinates 93946-101518. ClpX, a chaperone of the Hsp100 family, primarily functions in stress resistance, protein turnover, gene expression, and replication. RimJ is involved in ribosomal protein acetylation and ribosome assembly. <b>Neither ORF was detected in tblastn analysis.</b> |
| HP (COG3671) <sup>#</sup>         | 178768-179292      | Flanked by NuoG (REIS_0234) and AcnA (REIS_0235). <b>Detected as a full-length ORF in tblastn analysis.</b>                                                                                                                                                                                                                                                                                                                                                     |
| SecE*,<br>tRNA <sup>Ala-GGC</sup> | 446009-446512      | Within G30. Gap flanked by NusG (REIS_0555) and EF-G (REIS_0556, frameshift). SecE is an integral component of the general protein secretion pathway. <b>Detected as a full-length ORF in tblastn analysis.</b>                                                                                                                                                                                                                                                 |
| HtrA*                             | 454099-455493      | REIS_0564 (degenerate) flanked by sulfur-transferase RHOD (REIS_0563) and HflC (REIS_0565). HtrA is a serine protease and chaperone, primarily involved in protein secretion and quality control. <b>Detected as a probable frameshift in tblastn analysis.</b>                                                                                                                                                                                                 |
| RlpA*                             | 556578- 557930     | Split ORF (REIS_0694 and REIS_0695) truncated by G37. Flanked by DacF (REIS_0693) and lipoprotein OsmY (REIS_0696). Rare lipoprotein A has a putative role in lipid anchoring to the cell envelope. <b>Detected as a probable frameshift in tblastn analysis.</b>                                                                                                                                                                                               |
| GpsA*                             | 589386-590306      | Frameshift (REIS_0728). Flanked by TNP (REIS_0727) and metal-dependent hydrolase                                                                                                                                                                                                                                                                                                                                                                                |

|                                               |                 |                                                                                                                                                                                                                                                                                                                                                                                                                                                                                                                                                                                          |
|-----------------------------------------------|-----------------|------------------------------------------------------------------------------------------------------------------------------------------------------------------------------------------------------------------------------------------------------------------------------------------------------------------------------------------------------------------------------------------------------------------------------------------------------------------------------------------------------------------------------------------------------------------------------------------|
|                                               |                 | RMMBL ( <a href="#">REIS_0729</a> ). Likely recombination with breakpoint at 975685-976190. GpsA is a glycerol-3-phosphate dehydrogenase functioning in phospholipid synthesis. <b>Detected as a probable frameshift in tblastn analysis.</b> NOTE: this gene is truncated (86 aa) in <i>R. candensis</i> .                                                                                                                                                                                                                                                                              |
| UvrC <sup>#</sup> ,<br>(DUF461)*              | 891000-896068   | Within G41. Gap flanked by two singletons: octaprenyl-diphosphate synthase ( <a href="#">REIS_1078</a> ) and a truncated SpoT ORF ( <a href="#">REIS_1079</a> ). UvrC functions in DNA lesion repair <b>and was detected as an N-terminal truncation (~145 aa) in tblastn analysis. DUF461 was undetected in tblastn analysis.</b>                                                                                                                                                                                                                                                       |
| HipB*, Rbn*                                   | 959187-964144   | Within G56. Flanked by GlnA ( <a href="#">REIS_1131</a> ) and TNP ( <a href="#">REIS_1133</a> ); typically flanked by GlnA and Sca4 in other <i>Rickettsia</i> genomes. Sca4 in REIS is present in three copies in unrelated regions: <a href="#">REIS_1189</a> , <a href="#">REIS_2113</a> (pREIS1), and <a href="#">REIS_2264</a> (pREIS3). HipB is a HTH-DNA-binding protein involved in transcription regulation. <b>Detected as a full-length ORF in tblastn analysis.</b> Rbn, a ribonuclease with both exo- and endonuclease function, <b>was undetected in tblastn analysis.</b> |
| HemB*                                         | 985378-986559   | Within G60. Flanked by COG1293 (split ORF, <a href="#">REIS_1153</a> and <a href="#">REIS1155</a> ) and TNP fragment ( <a href="#">REIS_1156</a> ). HemB is a delta-aminolevulinic acid dehydratase involved in heme (porphyrin) metabolism. <b>Detected as an N-terminal truncation (~77 aa) in tblastn analysis.</b>                                                                                                                                                                                                                                                                   |
| n2B*                                          | 1171500-1172082 | Flanked by HP ( <a href="#">REIS_1371</a> ) and TNP ( <a href="#">REIS_1372</a> ). Likely recombination with breakpoint at 1386755-1390279. P-loop ATPase. <b>Undetected in tblastn analysis.</b>                                                                                                                                                                                                                                                                                                                                                                                        |
| Fni <sup>#</sup> ,<br>tRNA <sup>Ala-GGC</sup> | 1333147-1333298 | Region between TNP ( <a href="#">REIS_1544</a> ) and ClpP protease ( <a href="#">REIS_1545</a> ). Fni is an isopentenyl-diphosphate delta-isomerase involved in isoprene biosynthesis. <b>Undetected in tblastn analysis.</b>                                                                                                                                                                                                                                                                                                                                                            |
| HP (DUF2674) <sup>#</sup>                     | 1795604-1795880 | Flanked by TNP ( <a href="#">REIS_2084</a> ) and EmrB ( <a href="#">REIS_2085</a> , frameshift). <b>Detected as an N-terminal truncation (~26 aa) in tblastn analysis.</b>                                                                                                                                                                                                                                                                                                                                                                                                               |
| GatB*                                         | 1800802-1802455 | Within G106. Flanked by GatA ( <a href="#">REIS_2090</a> )                                                                                                                                                                                                                                                                                                                                                                                                                                                                                                                               |

and PBPb ([REIS\\_2092](#)). A small singleton ([REIS\\_2092](#)) may be a fragment of GatB. GatB is subunit B of the Asn/Gln amidotransferase. **Detected as an N-terminal truncation (~34 aa) in tblastn analysis.**

|       |                 |                                                                                                                                                                                                                                                                                                                                                                                                                                                                                                                                                                                     |
|-------|-----------------|-------------------------------------------------------------------------------------------------------------------------------------------------------------------------------------------------------------------------------------------------------------------------------------------------------------------------------------------------------------------------------------------------------------------------------------------------------------------------------------------------------------------------------------------------------------------------------------|
| DapB* | 1803800-1805862 | Flanked by flavin reductase ( <a href="#">REIS_2093</a> ) and a fragment of BAX inhibitor (BI)-1 like protein family, or YccA ( <a href="#">REIS_2094</a> ). YccA is recombined in two locales: <a href="#">REIS_2146</a> (pREIS1) and <a href="#">REIS_2231</a> (pREIS2). Both plasmid copies are adjacent to the ORFs encoding the small heat shock proteins typically present on rickettsial plasmids. DapB is a dihydrodipicolinate reductase functioning in amino acid, diaminopimelate and lysine biosynthesis. <b>Detected as a probable frameshift in tblastn analysis.</b> |
|-------|-----------------|-------------------------------------------------------------------------------------------------------------------------------------------------------------------------------------------------------------------------------------------------------------------------------------------------------------------------------------------------------------------------------------------------------------------------------------------------------------------------------------------------------------------------------------------------------------------------------------|

<sup>A</sup> \* = missing from Rickettsiaceae core genome, # = missing from *Rickettsia* core genome.

<sup>B</sup> Reference accession nos. for *R. rickettsii* str. Iowa: HP (DUF2532) = YP\_001650150, ClpX = YP\_001650429, RimJ = YP\_001650430, HP (COG3671) = YP\_001650579, SecE = YP\_001649535, HtrA = YP\_001649526, RlpA = YP\_001649912, GpsA = YP\_001649998, UvrC = YP\_001650238, HP (DUF461) = YP\_001650239, HipB = YP\_001650047, Rbn = YP\_001650048, HemB = YP\_001650174, n2B = YP\_001649646, Fni = YP\_001650118, HP (DUF2674) = YP\_001649563, GatB = YP\_001649554, DapB = YP\_001649551. The flanking genes for all SFG rickettsiae subjects were evaluated to determine the conservation of gene order.

<sup>C</sup> Gn = assembly gaps, where  $n = 1-109$ .

<sup>D</sup> HP = hypothetical protein, TNP = transposable elements and related derivatives.

<sup>E</sup> Query sequences from *R. rickettsii* str. Iowa were used to perform tblastn searches against the REIS WGS reads.

**Table S3.** Location of 109 regions of low coverage and uncertainty in the REIS genome assembly.

| gap | start  | end    | length | length of prior contig | Suspected missing genes <sup>A</sup> |
|-----|--------|--------|--------|------------------------|--------------------------------------|
| 1   | 5073   | 6072   | 1000   | 5072                   | NA                                   |
| 2   | 7177   | 7376   | 200    | 1104                   | NA                                   |
| 3   | 8732   | 8831   | 100    | 1355                   | NA                                   |
| 4   | 11885  | 12084  | 200    | 3053                   | NA                                   |
| 5   | 15440  | 15939  | 500    | 3355                   | NA                                   |
| 6   | 16949  | 17948  | 1000   | 1009                   | NA                                   |
| 7   | 19543  | 21542  | 2000   | 1594                   | NA                                   |
| 8   | 35431  | 36630  | 1200   | 13888                  | NA                                   |
| 9   | 44835  | 45834  | 1000   | 8204                   | NA                                   |
| 10  | 60740  | 61239  | 500    | 14905                  | NA                                   |
| 11  | 63462  | 63961  | 500    | 2222                   | NA                                   |
| 12  | 75166  | 75665  | 500    | 11204                  | NA                                   |
| 13  | 92197  | 92296  | 100    | 16531                  | NA                                   |
| 14  | 124204 | 125703 | 1500   | 31907                  | NA                                   |
| 15  | 127041 | 128040 | 1000   | 1337                   | NA                                   |
| 16  | 138522 | 138721 | 200    | 10481                  | NA                                   |
| 17  | 141221 | 141720 | 500    | 2499                   | NA                                   |
| 18  | 143405 | 143904 | 500    | 1684                   | ClpX*, RimJ <sup>#</sup>             |
| 19  | 393678 | 393877 | 200    | 249773                 | NA                                   |
| 20  | 401987 | 402286 | 300    | 8109                   | NA                                   |
| 21  | 405126 | 405625 | 500    | 2839                   | NA                                   |
| 22  | 421345 | 421844 | 500    | 15719                  | NA                                   |
| 23  | 424869 | 425368 | 500    | 3024                   | NA                                   |
| 24  | 426578 | 426677 | 100    | 1209                   | NA                                   |
| 25  | 428572 | 428671 | 100    | 1894                   | NA                                   |
| 26  | 431043 | 432042 | 1000   | 2371                   | NA                                   |
| 27  | 433659 | 434158 | 500    | 1616                   | NA                                   |
| 28  | 436029 | 437028 | 1000   | 1870                   | NA                                   |
| 29  | 438130 | 438329 | 200    | 1101                   | NA                                   |
| 30  | 446011 | 446510 | 500    | 7681                   | SecE*, tRNA <sup>Ala-GGC</sup>       |
| 31  | 447444 | 448443 | 1000   | 933                    | NA                                   |
| 32  | 479645 | 479944 | 300    | 31201                  | NA                                   |
| 33  | 484101 | 484300 | 200    | 4156                   | NA                                   |
| 34  | 487601 | 488600 | 1000   | 3300                   | NA                                   |
| 35  | 491953 | 492952 | 1000   | 3352                   | NA                                   |
| 36  | 542589 | 542688 | 100    | 49636                  | NA                                   |
| 37  | 556614 | 556713 | 100    | 13925                  | RlpA*                                |
| 38  | 834616 | 834715 | 100    | 277902                 | NA                                   |
| 39  | 853588 | 853687 | 100    | 18872                  | NA                                   |
| 40  | 871926 | 872025 | 100    | 18238                  | NA                                   |
| 41  | 891006 | 896005 | 5000   | 18980                  | UvrC <sup>#</sup> , DUF461*          |
| 42  | 896980 | 901979 | 5000   | 974                    | NA                                   |
| 43  | 905357 | 905556 | 200    | 3377                   | NA                                   |
| 44  | 909856 | 910055 | 200    | 4299                   | NA                                   |

|    |         |         |      |        |             |
|----|---------|---------|------|--------|-------------|
| 45 | 912922  | 914921  | 2000 | 2866   | NA          |
| 46 | 917180  | 918679  | 1500 | 2258   | NA          |
| 47 | 921146  | 922645  | 1500 | 2466   | NA          |
| 48 | 925835  | 926334  | 500  | 3189   | NA          |
| 49 | 932585  | 933084  | 500  | 6250   | NA          |
| 50 | 934360  | 934859  | 500  | 1275   | NA          |
| 51 | 943110  | 943609  | 500  | 8250   | NA          |
| 52 | 945353  | 945452  | 100  | 1743   | NA          |
| 53 | 946992  | 947091  | 100  | 1539   | NA          |
| 54 | 952148  | 952247  | 100  | 5056   | NA          |
| 55 | 956094  | 958093  | 2000 | 3846   | NA          |
| 56 | 960145  | 964144  | 4000 | 2051   | HipB*, Rbn* |
| 57 | 975686  | 976185  | 500  | 11541  | NA          |
| 58 | 978869  | 978968  | 100  | 2683   | NA          |
| 59 | 984421  | 984520  | 100  | 5452   | NA          |
| 60 | 986241  | 986340  | 100  | 1720   | HemB*       |
| 61 | 987741  | 988740  | 1000 | 1400   | NA          |
| 62 | 990391  | 991390  | 1000 | 1650   | NA          |
| 63 | 1012415 | 1013414 | 1000 | 21024  | NA          |
| 64 | 1014712 | 1016711 | 2000 | 1297   | NA          |
| 65 | 1020107 | 1020706 | 600  | 3395   | NA          |
| 66 | 1057152 | 1057451 | 300  | 36445  | NA          |
| 67 | 1062658 | 1062857 | 200  | 5206   | NA          |
| 68 | 1064720 | 1064919 | 200  | 1862   | NA          |
| 69 | 1078289 | 1080788 | 2500 | 13369  | NA          |
| 70 | 1084486 | 1085085 | 600  | 3697   | NA          |
| 71 | 1211094 | 1211593 | 500  | 126008 | NA          |
| 72 | 1221233 | 1222232 | 1000 | 9639   | NA          |
| 73 | 1230216 | 1230715 | 500  | 7983   | NA          |
| 74 | 1233098 | 1235097 | 2000 | 2382   | NA          |
| 75 | 1236696 | 1238195 | 1500 | 1598   | NA          |
| 76 | 1243165 | 1243364 | 200  | 4969   | NA          |
| 77 | 1250762 | 1250961 | 200  | 7397   | NA          |
| 78 | 1260435 | 1261934 | 1500 | 9473   | NA          |
| 79 | 1276914 | 1277013 | 100  | 14979  | NA          |
| 80 | 1301771 | 1301970 | 200  | 24757  | NA          |
| 81 | 1395675 | 1397174 | 1500 | 93704  | NA          |
| 82 | 1414264 | 1414363 | 100  | 17089  | NA          |
| 83 | 1427376 | 1428375 | 1000 | 13012  | NA          |
| 84 | 1430770 | 1431269 | 500  | 2394   | NA          |
| 85 | 1436864 | 1437363 | 500  | 5594   | NA          |
| 86 | 1440729 | 1441228 | 500  | 3365   | NA          |
| 87 | 1443395 | 1443894 | 500  | 2166   | NA          |
| 88 | 1446257 | 1446856 | 600  | 2362   | NA          |
| 89 | 1461972 | 1462371 | 400  | 15115  | NA          |
| 90 | 1624772 | 1625271 | 500  | 162400 | NA          |
| 91 | 1647976 | 1648175 | 200  | 22704  | NA          |
| 92 | 1697324 | 1698023 | 700  | 49148  | NA          |
| 93 | 1726820 | 1727319 | 500  | 28796  | NA          |
| 94 | 1729596 | 1729795 | 200  | 2276   | NA          |
| 95 | 1738190 | 1738289 | 100  | 8394   | NA          |

|     |         |         |      |       |       |
|-----|---------|---------|------|-------|-------|
| 96  | 1740641 | 1740940 | 300  | 2351  | NA    |
| 97  | 1747214 | 1748713 | 1500 | 6273  | NA    |
| 98  | 1750796 | 1750895 | 100  | 2082  | NA    |
| 99  | 1751952 | 1752151 | 200  | 1056  | NA    |
| 100 | 1758872 | 1759071 | 200  | 6720  | NA    |
| 101 | 1768315 | 1769914 | 1600 | 9243  | NA    |
| 102 | 1771182 | 1775181 | 4000 | 1267  | NA    |
| 103 | 1777631 | 1778630 | 1000 | 2449  | NA    |
| 104 | 1781784 | 1782783 | 1000 | 3153  | NA    |
| 105 | 1794355 | 1794454 | 100  | 11571 | NA    |
| 106 | 1800854 | 1802453 | 1600 | 6399  | GatB* |
| 107 | 1803800 | 1805799 | 2000 | 1346  | NA    |
| 108 | 1809020 | 1810019 | 1000 | 3220  | NA    |
| 109 | 1817934 | 1818133 | 200  | 7914  | NA    |

<sup>A</sup> \* = missing from Rickettsiaceae core genome, <sup>#</sup> = missing from *Rickettsia* core genome. See [Table S2](#) for more information.

**Table S4.** NCBI accession numbers for proteins used to estimate the phylogeny of the biotin metabolic pathway.

| Taxon                                                 | Biotin synthesis genes <sup>A</sup> |              |              |              |              |               |
|-------------------------------------------------------|-------------------------------------|--------------|--------------|--------------|--------------|---------------|
|                                                       | BioA (OAT)                          | BioD (DTBS)  | BioC (UbiE)  | BioH         | BioF (KBL)   | BioB (radSAM) |
| REIS                                                  | ZP_04698248                         | ZP_04698249  | ZP_04698250  | ZP_04698251  | ZP_04698252  | ZP_04698253   |
| <i>Lawsonia intracellularis</i><br>str. PHE/MN1-00    | YP_594802                           | YP_594801    | YP_594800    | YP_594799    | YP_594798    | YP_594797     |
| <i>Neorickettsia risticii</i><br>str. Illinois        | YP_003081804                        | YP_003081803 | YP_003081802 | YP_003081801 | YP_003081800 | YP_003081798  |
| <i>Neorickettsia sennetsu</i><br>str. Miyayama        | YP_506498                           | YP_506497    | YP_506495    | YP_506494    | YP_506493    | YP_506492     |
| <i>Magnetospirillum magneticum</i><br>str. AMB-1      | YP_422126                           | YP_422125    | YP_422124    | YP_422123    | YP_422122    | YP_422120     |
| <i>Achromobacter piechaudii</i><br>str. ATCC 43553    | ZP_06685978                         | ZP_06685981  | ZP_06685981  | ZP_06685980  | ZP_06685979  | ZP_06689510   |
| <i>Bordetella pertussis</i><br>str. Tohama I          | NP_880815                           | NP_880812    | NP_880812    | NP_880813    | NP_880814    | NP_881326     |
| <i>Bordetella avium</i> str. 197N                     | YP_786961                           | YP_786964    | YP_786964    | YP_786963    | YP_786962    | YP_785360     |
| <i>Bordetella parapertussis</i><br>str. 12822         | NP_884047                           | NP_884044    | NP_884044    | NP_884045    | NP_884046    | NP_883439     |
| <i>Gluconacetobacter diazotrophicus</i><br>str. PAI 5 | YP_001602164                        | YP_001602167 | YP_001602167 | YP_001602166 | YP_001602165 | YP_001603186  |
| <i>Crocospaera watsonii</i><br>str. WH 8501           | ZP_00514990                         | ZP_00515520  | ZP_00515866  | ZP_00515865  | ZP_00515864  | ZP_00514954   |
| <i>Gluconacetobacter hansenii</i><br>str. ATCC 23769  | ZP_06834781                         | ZP_06834784  | ZP_06834784  | ZP_06834783  | ZP_06834782  | ZP_06833902   |

| Taxon                                                    | Biotin synthesis genes <sup>A</sup> |              |              |              |              |               |
|----------------------------------------------------------|-------------------------------------|--------------|--------------|--------------|--------------|---------------|
|                                                          | BioA (OAT)                          | BioD (DTBS)  | BioC (UbiE)  | BioH         | BioF (KBL)   | BioB (radSAM) |
| <i>Bordetella bronchiseptica</i><br>str. RB50            | NP_889867                           | NP_889870    | NP_889870    | NP_889869    | NP_889868    | NP_887883     |
| <i>Nitrococcus mobilis</i><br>str. Nb-231                | ZP_01125956                         | ZP_01125955  | ZP_01127180  | ZP_01128606  | ZP_01128607  | ZP_01127181   |
| <i>Cyanothece</i> sp. ATCC 51142                         | YP_001804508                        | YP_001804930 | YP_001805563 | YP_001805564 | YP_001805565 | YP_001805764  |
| <i>Zymomonas mobilis</i><br>subsp. mobilis ZM4           | YP_163653                           | YP_163650    | YP_163650    | YP_163652    | YP_163651    | YP_161829     |
| <i>Legionella pneumophila</i><br>str. Paris              | YP_123751                           | YP_123755    | YP_124590    | YP_123754    | YP_123753    | YP_123752     |
| <i>Legionella pneumophila</i><br>str. Corby              | YP_001250207                        | YP_001250211 | YP_001251077 | YP_001250210 | YP_001250209 | YP_001250208  |
| <i>Legionella longbeachae</i><br>str. D-4968             | ZP_06188812                         | ZP_06188816  | ZP_06186482  | ZP_06188815  | ZP_06188814  | ZP_06188813   |
| <i>Parachlamydia acanthamoebae</i><br>str. Hall's coccus | ZP_06299038                         | ZP_06299039  | ZP_06299041  | ZP_06300545  | ZP_06299042  | ZP_06300151   |
| <i>Chlamydophila pneumoniae</i><br>str. CWL029           | NP_225235                           | NP_225236    | -----        | -----        | NP_225237    | NP_225238     |
| <i>Escherichia coli</i> str. K-12<br>substr. MG1655      | NP_415295                           | NP_415299    | NP_415298    | NP_417871    | NP_415297    | NP_415296     |
| <i>Kurthia</i> sp. 538-KA26                              | BAB39453                            | BAB39454     | BAB39463     | BAB39462     | BAB39461     | BAB39458      |
| <i>Neisseria meningitidis</i> str. MC58                  | NP_273774                           | NP_273775    | NP_273521    | NP_273326    | NP_273519    | NP_274174     |
| <i>Pseudomonas aeruginosa</i><br>str. PAO1               | NP_249111                           | NP_249195    | NP_249194    | NP_249193    | NP_249192    | NP_249191     |
| <i>Vibrio cholerae</i> str. B33                          | -----                               | ZP_01976490  | ZP_01976489  | ZP_01973913  | ZP_01976491  | ZP_01976488   |

| Taxon                                            | Biotin synthesis genes <sup>A</sup> |              |              |             |              |               |
|--------------------------------------------------|-------------------------------------|--------------|--------------|-------------|--------------|---------------|
|                                                  | BioA (OAT)                          | BioD (DTBS)  | BioC (UbiE)  | BioH        | BioF (KBL)   | BioB (radSAM) |
| <i>Vibrio cholerae</i> str. B33                  | ZP_04400515                         | ZP_04400519  | ZP_04400518  | ZP_04399326 | ZP_04400517  | ZP_04400516   |
| <i>Xylella fastidiosa</i> str. 9a5c              | NP_297482                           | NP_299755    | NP_299378    | NP_298645   | NP_298646    | NP_297357     |
| <i>Anaplasma centrale</i> str. Israel            | YP_003328623                        | YP_003328228 | YP_003328117 | ----        | YP_003328822 | YP_003328325  |
| <i>Anaplasma phagocytophilum</i><br>str. HZ      | YP_505081                           | YP_505758    | YP_504662    | ----        | YP_505544    | YP_504837     |
| <i>Anaplasma marginale</i><br>str. St. Maries    | YP_153824                           | YP_154232    | YP_154354    | ----        | YP_153625    | YP_154121     |
| <i>Anaplasma marginale</i><br>str. Virginia      | ZP_05279021                         | ZP_05279432  | ZP_05279564  | ----        | ZP_05278823  | ZP_05279325   |
| <i>Anaplasma marginale</i><br>str. Florida       | YP_002563530                        | YP_002563940 | YP_002564061 | ----        | YP_002563334 | YP_002563832  |
| <i>Ehrlichia ruminantium</i><br>str. Gardel      | YP_196321                           | YP_196818    | YP_195935    | ----        | YP_196094    | YP_196599     |
| <i>Ehrlichia ruminantium</i><br>str. Welgevonden | YP_180252                           | YP_180714    | YP_179888    | ----        | YP_180041    | YP_180514     |
| <i>Ehrlichia ruminantium</i><br>str. Welgevonden | YP_197275                           | YP_196818    | YP_196885    | ----        | YP_197049    | YP_197558     |
| <i>Ehrlichia chaffeensis</i><br>str. Sapulpa     | ZP_00545089                         | ZP_00545228  | ZP_00544740  | ----        | ZP_00545310  | ZP_00544607   |
| <i>Ehrlichia chaffeensis</i><br>str. Arkansas    | YP_507474                           | YP_507894    | YP_506868    | ----        | YP_507738    | YP_507172     |
| <i>Ehrlichia canis</i> str. Jake                 | YP_303017                           | YP_303517    | YP_302980    | ----        | YP_302820    | YP_303287     |

<sup>A</sup> BioA, adenosylmethionine-8-amino-7-oxononanoate aminotransferase; BioD, dethiobiotin synthetase; BioC, carboxyl-O-methyltransferase; BioH, carboxylesterase; BioF, 8-amino-7-oxononanoate synthase; BioB, biotin synthase.

**Table S5.** Distribution of 1,480 REIS CDS across 15 Rickettsiaceae genomes.

| <b>Genome</b>                     | <b>Shared OGs <sup>A</sup></b> | <b>No. proteins <sup>B</sup></b> | <b>REIS proteins <sup>C</sup></b> |
|-----------------------------------|--------------------------------|----------------------------------|-----------------------------------|
| <b>Scrub Typhus Group</b>         |                                |                                  |                                   |
| <i>O. tsutsugamushi</i> Ikeda     | 590                            | 813 (27.4)                       | 689 (14.4)                        |
| <i>O. tsutsugamushi</i> Boryong   | 567                            | 712 (20.4)                       | 700 (19.0)                        |
| <b>Ancestral Group</b>            |                                |                                  |                                   |
| <i>R. bellii</i> RML369-C         | 914                            | 933 (2)                          | 1041 (12.2)                       |
| <i>R. bellii</i> OSU 85 389       | 898                            | 906 (0.9)                        | 1029 (12.7)                       |
| <i>R. canadensis</i> McKiel       | 820                            | 827 (0.9)                        | 853 (3.9)                         |
| <b>Typhus Group</b>               |                                |                                  |                                   |
| <i>R. prowazekii</i> Madrid E     | 754                            | 755 (0.3)                        | 773 (2.5)                         |
| <i>R. typhi</i> Wilmington        | 756                            | 758 (0.3)                        | 776 (2.6)                         |
| <b>Transitional Group</b>         |                                |                                  |                                   |
| <i>R. felis</i> URRWXCal2         | 964                            | 1033 (6.7)                       | 1101 (12.4)                       |
| <i>R. akari</i> Hartford          | 866                            | 900 (3.8)                        | 1087 (20.3)                       |
| <b>Spotted fever Group</b>        |                                |                                  |                                   |
| <i>R. massiliae</i> MTU5          | 892                            | 909 (1.9)                        | 1031 (13.5)                       |
| <i>R. rickettsii</i> Sheila Smith | 874                            | 886 (1.4)                        | 906 (3.5)                         |
| <i>R. rickettsii</i> Iowa         | 928                            | 959 (3.2)                        | 969 (4.2)                         |
| <i>R. conorii</i> Malish 7        | 901                            | 911 (1.1)                        | 941 (4.3)                         |
| <i>R. sibirica</i> 246            | 889                            | 902 (1.4)                        | 925 (3.9)                         |
| <i>R. africae</i> ESF-5           | 858                            | 864 (0.7)                        | 893 (3.9)                         |

<sup>A</sup> Number of orthologous groups (OGs) per genome containing at least one REIS protein.

<sup>B</sup> Total proteins within shared OGs. Parentheses enclose percentage of proteins that are multicopy.

<sup>C</sup> Total REIS proteins within shared OGs. Values in parentheses as described above.

Table S6. Common protein families across nine plasmids from six *Rickettsia* genomes <sup>A</sup>.

| Protein <sup>B</sup> | Plasmids <sup>C,D,E</sup>    |                        |                                                  |             |                               |                    |           |                   |           |
|----------------------|------------------------------|------------------------|--------------------------------------------------|-------------|-------------------------------|--------------------|-----------|-------------------|-----------|
|                      | pRF (68)                     | pREIS1 (53)            | pREIS2 (81)                                      | pREIS3 (43) | pREIS4 (52)                   | pRM (17)           | pRMA (12) | pRPR (20)         | pRAF (11) |
| DnaA                 | 396; 19<br>774; 5            | 821; 2109              | 768; 2196                                        | 790; 2255   | ----                          | 820; 16            | 778; 1    | 779; 4            | 740; 1260 |
| TNP_M                | 250; 30<br>230; 54           | ----                   | 221; 2166<br>224; 2235<br>224; 2211<br>224; 2176 | ----        | 141; 11<br>141; 28<br>221; 44 | ----               | ----      | ----              | ----      |
| HTH_XRE              | 220; 29<br>122; 2            | 161; 2112              | 59; 2192                                         | ----        | ----                          | 167; 19<br>168; 20 | 161; 12   | ----              | 157; 1269 |
| TraA <sub>Ti</sub>   | 93; 38<br>907; 39<br>357; 40 | 2464; 2159             | 499; 2223                                        | 2076; 2246  | ----                          | 187; 3             | ----      | ----              | ----      |
| IbpA                 | 196; 52<br>----              | 175; 2145              | 175; 2232                                        | ----        | 130; 14<br>130; 25            | 174; 7             | ----      | 175; 12           | ----      |
| ParA_1               | 211; 23                      | 210; 2111              | ----                                             | ----        | 271; 19                       | 196; 18            | 213; 13   | 243; 1            | 223; 1270 |
| Rve                  | 289; 48                      | 178; 2142<br>178; 2153 | ----                                             | 218; 2286   | ----                          | ----               | ----      | 364; 5<br>364; 15 | ----      |
| HSP                  | 163; 51                      | ----                   | ----                                             | ----        | 154; 13<br>154; 26            | 158; 6             | ----      | 154; 13           | ----      |
| SR_ResInv            | 182; 66                      | ----                   | 72; 2167                                         | ----        | ----                          | ----               | 183; 5    | ----              | 194; 1262 |
| TNP_31_1             | 371; 61                      | 318; 2136              | ----                                             | ----        | ----                          | ----               | 347; 6    | ----              | 361; 1264 |
| TraD_AP              | ----                         | 104; 2102              | 104; 2244<br>104; 2229                           | 104; 2248   | ----                          | ----               | ----      | ----              | 99; 1266  |
| ISRpe1               | 63; 49                       | 156; 2141<br>157; 2152 | ----                                             | 136; 2287   | ----                          | ----               | ----      | ----              | ----      |
| TNP_11               | 109; 1                       | ----                   | 332; 2169<br>158; 2209<br>158; 2178              | ----        | ----                          | ----               | ----      | ----              | ----      |
| p_TNP                | ----                         | 312; 2148<br>307; 2105 | ----                                             | ----        | ----                          | 296; 22            | ----      | 304; 14           | ----      |
| TPR_1                | 254; 17<br>815; 26           | ----                   | ----                                             | 375; 2261   | ----                          | ----               | ----      | ----              | ----      |
| TraA_AP              | 137; 65                      | ----                   | 131; 2162                                        | ----        | ----                          | 134; 10            | ----      | ----              | ----      |
| Sca12                | 476; 25                      | ----                   | ----                                             | 852; 2259   | ----                          | ----               | ----      | ----              | 881; 1268 |
| TNP_rve              | ----                         | ----                   | ----                                             | ----        | 173; 10<br>173; 29            | 130; 11            | ----      | ----              | ----      |

| Protein <sup>B</sup> | Plasmids <sup>C,D,E</sup> |             |             |             |                    |             |             |             |             |
|----------------------|---------------------------|-------------|-------------|-------------|--------------------|-------------|-------------|-------------|-------------|
|                      | pRF (68)                  | pREIS1 (53) | pREIS2 (81) | pREIS3 (43) | pREIS4 (52)        | pRM (17)    | pRMA (12)   | pRPR (20)   | pRAF (11)   |
| SR_ResInv_2          | ----                      | ----        | ----        | ----        | 111; 12<br>111; 27 | 127; 5      | ----        | ----        | ----        |
| HP_1                 | 92; 45                    | 73; 2131    | ----        | ----        | ----               | ----        | ----        | ----        | ----        |
| TraD_F               | 309; 44                   | 567; 2132   | ----        | ----        | ----               | ----        | ----        | ----        | ----        |
| SR_ResInv_3          | 146; 32                   | 192; 2106   | ----        | ----        | ----               | 192 23      | ----        | ----        | ----        |
| TraD_Ti              | 85; 37                    | 74; 2103    | 74; 2245    | ----        | ----               | ----        | ----        | ----        | ----        |
| TNP_31_2             | 350; 41                   | ----        | ----        | 370; 2251   | ----               | ----        | ----        | ----        | ----        |
| Sca4                 | 599; 27                   | ----        | ----        | 583; 2264   | ----               | ----        | ----        | 470; 19     | ----        |
| DnaG-like            | 387; 62                   | ----        | ----        | 1063; 2288  | ----               | ----        | ----        | ----        | ----        |
| HP_2                 | 281; 12                   | ----        | ----        | 222; 2263   | ----               | ----        | ----        | ----        | ----        |
| TNP_14_rve           | 102; 64                   | ----        | 293; 2170   | ----        | ----               | ----        | ----        | ----        | ----        |
| ParA_2               | 271; 3                    | ----        | 271; 2193   | ----        | ----               | ----        | ----        | ----        | ----        |
| HP_3                 | 106; 4                    | ----        | 106; 2194   | ----        | ----               | ----        | ----        | ----        | ----        |
| HP_4                 | 96; 59                    | ----        | ----        | ----        | ----               | ----        | 358; 10     | ----        | ----        |
| TNP_31_3             | ----                      | ----        | 236; 2173   | ----        | ----               | ----        | ----        | ----        | 213; 1263   |
| HP_5                 | ----                      | ----        | ----        | ----        | 74; 11<br>74; 36   | ----        | ----        | ----        | ----        |
| ProP                 | ----                      | ----        | ----        | ----        | 323; 31            | 416; 12     | ----        | ----        | ----        |
| POLIIIe              | 377; 34                   | ----        | 75; 2163    | ----        | ----               | ----        | ----        | ----        | ----        |
| HP_6                 | ----                      | ----        | 36; 2171    | ----        | ----               | ----        | 90; 7       | ----        | ----        |
| RecD/TraA            | ----                      | ----        | 722; 2164   | ----        | ----               | 721; 8      | ----        | ----        | ----        |
| MdIB                 | ----                      | ----        | 590; 2217   | ----        | ----               | ----        | ----        | 588; 11     | ----        |
| TPR_2                | 419; 18                   | ----        | ----        | ----        | ----               | ----        | 103; 8      | ----        | ----        |
| HP_7                 | 164; 21                   | ----        | ----        | ----        | ----               | ----        | ----        | 141; 3      | ----        |
| HP_8                 | 82; 22                    | ----        | ----        | ----        | ----               | ----        | ----        | 82; 2       | ----        |
| <b>Total</b>         | <b>37</b>                 | <b>17</b>   | <b>24</b>   | <b>11</b>   | <b>15</b>          | <b>14</b>   | <b>8</b>    | <b>11</b>   | <b>8</b>    |
| <b>% grouped</b>     | <b>54.4</b>               | <b>32.1</b> | <b>29.6</b> | <b>20.8</b> | <b>28.8</b>        | <b>82.4</b> | <b>66.7</b> | <b>55.0</b> | <b>72.7</b> |

<sup>A</sup> Orthologous protein families generated using OrthoMCL (1).

<sup>B</sup> Protein names as follows (from top to bottom of table): 'DnaA', chromosomal replication initiation protein (CTD); 'TNP\_M', MULE transposase; 'HTH\_XRE', helix-turn-helix-type transcriptional regulator xre; 'TraA<sub>Ti</sub>', conjugative transfer relaxase; 'IbpA', molecular chaperone (small heat shock protein); 'ParA\_1', chromosome partitioning protein A; 'Rve', transposase rve superfamily (integrase core domain); 'HSP', alpha-crystallin domain (ACD) of alpha-crystallin-type small(s) heat shock proteins; 'SR\_ResInv',

serine recombinase (SR) family, resolvase and invertase subfamily, catalytic domain; 'TNP\_31\_1', putative transposase, YhgA-like; pfam04754; 'TraD\_AP', TraD associated protein; 'ISRpe1', N-terminal region of transposase ISRpe1; 'TNP\_11', transposase DDE domain, pfam01609; 'p\_TNP', putative transposase T\_den\_put\_tspse; 'TPR\_1', tetratricopeptide repeat domain-containing protein; 'TraA\_AP', TraA associated protein; 'Sca12', surface antigen 12; 'TNP\_rve', transposase rve superfamily (integrase core domain); 'SR\_ResInv\_2', serine recombinase (SR) family, resolvase and invertase subfamily, catalytic domain; 'HP\_1', hypothetical protein known only from REIS and *R. felis*; 'TraD\_F', TraD F-T4SS coupling protein (VirD4 homolog); 'SR\_ResInv\_3', serine recombinase (SR) family, resolvase and invertase subfamily, catalytic domain; 'TraD\_Ti', TraD conjugative transfer protein; 'TNP\_31\_2', putative transposase, YhgA-like, with Yae1\_N domain (COG5464); 'Sca4', surface antigen 4; 'DnaG-like', topoisomerase-primase (TORPIM) nucleotidyl transferase/hydrolase domain; 'HP\_2', hypothetical protein known only from REIS and *R. felis*; 'TNP\_14\_rve', transposase 14 (NTD) with rve superfamily (integrase core domain) (CTD); 'ParA\_2', chromosome partitioning protein A; 'HP\_3', hypothetical protein known only from REIS and *R. felis*; 'HP\_4', length variable hypothetical protein known only from *Rickettsia* plasmids; 'TNP\_31\_3', putative transposase, YhgA-like; pfam04754; 'HP\_5', hypothetical protein known only from pREIS4; 'ProP', proline/betaine transporter; 'POLIIIe', DNA polymerase III, epsilon subunit-like; 'HP\_6', hypothetical protein known only from *Rickettsia* plasmids, possibly with TPR repeat domain; 'RecD/TraA', helicase similar to RecD (exodeoxyribonuclease V alpha chain); 'MdB', ABC-type multidrug efflux pump; 'TPR\_2', tetratricopeptide repeat domain-containing protein; 'HP\_7', hypothetical protein known only from *Rickettsia* plasmids, possible transcription regulator; 'HP\_8', hypothetical protein with limited distribution outside of *Rickettsia* spp.

<sup>c</sup> Total number of ORFs included in clustering in parentheses. Plasmid associations with rickettsial genomes are illustrated in [Fig. 3](#) of the text.

<sup>d</sup> Protein length (aa) before semicolon; plasmid ORF ID number after.

<sup>e</sup> ORFs colored red are truncated or split relative to the largest ORF in each orthologous group.

1. **Li, L., C. J. Stoeckert, Jr., and D. S. Roos.** 2003. OrthoMCL: identification of ortholog groups for eukaryotic genomes. *Genome Res* **13**:2178-2189.

**Table S7.** Taxonomic breakdown of the best non-*Rickettsia* blastp hits to 769 REIS proteins.

| Taxon                                      | MGE              |                   | Other            |                   | All              |                   |
|--------------------------------------------|------------------|-------------------|------------------|-------------------|------------------|-------------------|
|                                            | No. <sup>B</sup> | Avg. <sup>C</sup> | No. <sup>B</sup> | Avg. <sup>C</sup> | No. <sup>B</sup> | Avg. <sup>C</sup> |
| <i>Legionella pneumophila</i> Paris        | 126              | 4.20E-04          | 1                | 1.00E-11          | 127              | 4.16E-04          |
| <i>Geobacter uraniireducens</i> Rf4        | 103              | 1.27E-07          | 0                | NA                | 103              | 1.27E-07          |
| <i>Microscilla</i> sp. PRE1                | 100              | 5.48E-11          | 0                | NA                | 100              | 5.48E-11          |
| <i>Orientia tsutsugamushi</i> Boryong      | 44               | 6.59E-04          | 1                | 2.60E-41          | 45               | 6.44E-04          |
| <i>Microcystis aeruginosa</i> PCC 7806     | 41               | 2.05E-02          | 0                | NA                | 41               | 2.05E-02          |
| <i>Wolbachia (D. simulans)</i>             | 3                | 2.40E-67          | 0                | NA                | 3                | 2.40E-67          |
| <i>Trichomonas vaginalis</i> G3            | 2                | 0.0037            | 6                | 0.2983            | 8                | 0.2247            |
| <i>Lawsonia intracellularis</i> PHE/MN1-00 | 0                | NA                | 10               | 2.60E-56          | 10               | 2.60E-56          |
| <i>Wolbachia (D. melanogaster)</i>         | 1                | 4.00E-27          | 9                | 1.33E-05          | 10               | 1.20E-05          |
| <i>Protochlamydia amoebophila</i> UWE25    | 8                | 0.0022            | 1                | 1.20E-06          | 9                | 0.002             |
| <i>Mycoplasma hyopneumoniae</i> J          | 1                | 0.47              | 1                | 0.13              | 2                | 0.3               |
| <i>Klebsiella pneumoniae</i> MGH 78578     | 6                | 4.67E-24          | 1                | 0.94              | 7                | 1.34E-01          |
| <i>Gammaproteobacteria</i>                 | 50               | 2.59E-02          | 24               | 2.98E-01          | 74               | 1.14E-01          |
| Firmicutes                                 | 7                | 5.14E-01          | 14               | 0.2154            | 21               | 3.06E-01          |
| Cyanobacteria                              | 13               | 1.33E-02          | 2                | 1.80E-18          | 15               | 1.15E-02          |
| Bacteroidetes                              | 17               | 0.0156            | 2                | 2.60E-04          | 19               | 0.014             |
| Actinobacteria                             | 3                | 0.3013            | 10               | 1.38-01           | 13               | 0.1760            |
| <i>Alphaproteobacteria</i>                 | 10               | 9.00E-02          | 9                | 1.44E-01          | 19               | 1.16E-01          |
| <i>Betaproteobacteria</i>                  | 13               | 0.0409            | 4                | 0.9025            | 17               | 0.2436            |
| <i>Epsilonproteobacteria</i>               | 9                | 3.11E-02          | 1                | 0.049             | 10               | 3.29E-02          |
| other bacteria <sup>A</sup>                | 4                | 0.2501            | 5                | 0.691             | 9                | 0.4951            |
| Eukaryota                                  | 43               | 0.4803            | 47               | 0.6673            | 90               | 0.578             |
| Archaea                                    | 5                | 2.02E-01          | 10               | 0.3049            | 15               | 2.71E-01          |

<sup>A</sup> Aquificae (1), Chloroflexi (3), Deinococcus-Thermus (1), Fusobacteria (1), Spirochaetes (1), and Tenericutes (2)

<sup>B</sup> No. of top blastp hits.

<sup>C</sup> Avg. e-value for top blastp hits.

**Table S8.** Distribution of 653 REIS transposases and inactive derivatives across 15 other Rickettsiaceae genomes. Roughly half of the REIS transposases (TNPs) are singletons or duplicated singletons. The other half are only found in protein families that are non-conserved across the Rickettsiaceae genomes (Note: no TNPs are present within the core Rickettsiaceae or *Rickettsia* genomes). The majority of these TNPs (305) are found within only 26 protein families, illustrating the extreme proliferation of several TNPs within the REIS genome. The distribution of 317 TNPs across each Rickettsiaceae genome is shown in [Fig. S9](#).

| Distribution           | Makeup <sup>A</sup> | Breakdown <sup>B</sup> |                    |                  |                |
|------------------------|---------------------|------------------------|--------------------|------------------|----------------|
|                        |                     | Size <sup>C</sup>      | w/TNP <sup>D</sup> | TNP <sup>E</sup> | % <sup>F</sup> |
| Rickettsiaceae core    | P                   | 459                    | 0                  | 0                | --             |
|                        | I                   | 9                      | 0                  | 0                | --             |
| <i>Rickettsia</i> core | P                   | 159                    | 0                  | 0                | --             |
|                        | I                   | 7                      | 0                  | 0                | --             |
| Non-conserved          | S                   | 338                    | 12                 | 12               | 3.6            |
|                        | M                   | 137                    | 26                 | 305              | 1,173          |
| REIS singletons        | T                   | 388                    | NA                 | 39               | 10.1           |
|                        | D                   | 351                    | NA                 | 263              | 74.9           |

<sup>A</sup> Membership across genomes: P, perfect (or one protein per genome); I, perfect with at least one genome contributing more than one protein; S, one protein per 2-15 genomes; M, one genome with more than one protein; T, true singleton; D, duplet (duplicated singleton). See [Fig. S3](#) for more information pertaining to orthologous group (OG) clustering.

<sup>B</sup> Distribution of 619 REIS TNPs across 15 other Rickettsiaceae genomes. Note: 34 putative TNPs from pREIS4 were not included in OG clustering.

<sup>C</sup> Total OGs for all except singletons and dupletons, which have total proteins.

<sup>D</sup> No. OGs containing TNPs. For singletons and dupletons, total TNPs are listed.

<sup>E</sup> Total no. of TNPs.

<sup>F</sup> Percentage of TNPs per group.

**Table S9.** Distribution in the REIS genome of putative virulence factors, common phylogenetic markers, and other proteins important in obligate intracellular lifestyle.

| <b>ORF<sup>A</sup></b> | <b>Description<sup>B</sup></b>                                                                                                                                                                                                                                                                                                                             |
|------------------------|------------------------------------------------------------------------------------------------------------------------------------------------------------------------------------------------------------------------------------------------------------------------------------------------------------------------------------------------------------|
| <b>GitA</b>            | Citrate synthase. Truncated (340 aa, <a href="#">REIS_1638</a> ) relative to other rickettsial proteins, which are highly conserved in length (435 aa).                                                                                                                                                                                                    |
| LipA                   | 17kDa surface antigen. Full length ( <a href="#">REIS_1933</a> ).                                                                                                                                                                                                                                                                                          |
| <b>Sca0 (RompA)</b>    | Surface antigen. Two split ORFs ( <a href="#">REIS_2041</a> and <a href="#">REIS_2042</a> ) flanked by TNP ( <a href="#">REIS_2043</a> ) and interrupted by gap (G100).                                                                                                                                                                                    |
| Sca1                   | Surface antigen. Full length ( <a href="#">REIS_1976</a> ).                                                                                                                                                                                                                                                                                                |
| <b>Sca2</b>            | Surface antigen and actin nucleator. Four fragments ( <a href="#">REIS_0502-REIS_0506</a> ) flanked by TNP ( <a href="#">REIS_0501</a> ) and interrupted by gap (G20).                                                                                                                                                                                     |
| <b>Sca3</b>            | Surface antigen. Absent. Possible fragment within gap G55, as Sca3 flanks ATP-dependent protease La ( <a href="#">REIS_1130</a> ) in other genomes.                                                                                                                                                                                                        |
| Sca4                   | Surface antigen. Three copies. Chromosome ORF ( <a href="#">REIS_1189</a> , 615 aa) is truncated by gap (G64). pREIS1 ( <a href="#">REIS_2113</a> , 320 aa) and pREIS3 ( <a href="#">REIS_2264</a> , 583 aa) ORFs closely resemble <i>R. peacockii</i> pRPR_19, which is a chimeric protein with only ~100 aa at the N-terminus having homology with Sca4. |
| <b>Sca5 (RompB)</b>    | Surface antigen (ubiquitous). Frameshift ( <a href="#">REIS_0057</a> ) flanked by TNP ( <a href="#">REIS_0056</a> ) and gap (G8). Likely an assembly problem, as a full length RompB sequence (ABQ57416) has been generated from a different population of REIS.                                                                                           |
| Sca6                   | Surface antigen. Absent.                                                                                                                                                                                                                                                                                                                                   |
| Sca7                   | Surface antigen. Absent.                                                                                                                                                                                                                                                                                                                                   |
| Sca8                   | Surface antigen. Absent.                                                                                                                                                                                                                                                                                                                                   |
| <b>Sca9</b>            | Surface antigen. Two split ORFs ( <a href="#">REIS_0202</a> , <a href="#">REIS_0203</a> ) flanked by TNP ( <a href="#">REIS_0201</a> ) and Sca13 region (see below). Combined ORFs (354 aa) are shorter than the largest ortholog ( <i>R. felis</i> , 557 aa).                                                                                             |
| Sca10                  | Surface antigen. Absent.                                                                                                                                                                                                                                                                                                                                   |
| Sca11                  | Surface antigen. Absent.                                                                                                                                                                                                                                                                                                                                   |
| Sca12                  | Surface antigen. Full length ( <a href="#">REIS_2259</a> ) and encoded on pREIS3.                                                                                                                                                                                                                                                                          |
| <b>Sca13</b>           | Two split ORFs ( <a href="#">REIS_0204</a> , <a href="#">REIS_0206</a> ) interrupted by TNP ( <a href="#">REIS_0205</a> ). Flanked by Sca9 region (see above) and toxin-anti-toxin module                                                                                                                                                                  |

|                |                                                                                                                                                                                                                                                                                                                                                             |
|----------------|-------------------------------------------------------------------------------------------------------------------------------------------------------------------------------------------------------------------------------------------------------------------------------------------------------------------------------------------------------------|
|                | ( <a href="#">REIS_0207</a> , <a href="#">REIS_0208</a> ).                                                                                                                                                                                                                                                                                                  |
| Sca14          | Surface antigen. Absent.                                                                                                                                                                                                                                                                                                                                    |
| Sca15          | Surface antigen. Absent.                                                                                                                                                                                                                                                                                                                                    |
| Sca16          | Surface antigen. Absent.                                                                                                                                                                                                                                                                                                                                    |
| Msp4_1         | Surface antigen/adhesin. Full length ( <a href="#">REIS_1939</a> ).                                                                                                                                                                                                                                                                                         |
| Msp4_2         | Surface antigen/adhesin. Full length ( <a href="#">REIS_1938</a> ).                                                                                                                                                                                                                                                                                         |
| Omp1<br>(YaeT) | Surface antigen. Full length ( <a href="#">REIS_2072</a> ).                                                                                                                                                                                                                                                                                                 |
| NlpD           | Outer membrane antigenic lipoprotein precursor. Full length ( <a href="#">REIS_1390</a> ).                                                                                                                                                                                                                                                                  |
| PrsA           | Peptidylprolyl isomerase, binds host histone. Full length ( <a href="#">REIS_1435</a> ).                                                                                                                                                                                                                                                                    |
| Pld            | Phospholipase D. Two copies: first chromosome copy ( <a href="#">REIS_0873</a> ) is between RAGE-bellii and RAGE-F in a region with multiple TNPs; second chromosome copy ( <a href="#">REIS_2037</a> ) is truncated and flanked by TNP ( <a href="#">REIS_2036</a> ) and a frameshift ( <a href="#">REIS_2038</a> ; Poly-beta-hydroxybutyrate polymerase). |
| Pat            | Phospholipase, patatin B1. Full length ( <a href="#">REIS_1734</a> ).                                                                                                                                                                                                                                                                                       |
| <b>Pat2</b>    | Phospholipase, patatin B2. Two split ORFs ( <a href="#">REIS_1222</a> , <a href="#">REIS_1223</a> ) flanked by BirA ( <a href="#">REIS_1221</a> ) and HP ( <a href="#">REIS_1224</a> ).                                                                                                                                                                     |
| PpcE           | Post proline cleaving enzyme (prolyl oligopeptidase). Absent.                                                                                                                                                                                                                                                                                               |
| PtrB           | Protease B (prolyl oligopeptidase). Full length ( <a href="#">REIS_1259</a> ).                                                                                                                                                                                                                                                                              |
| Dap2           | Dipeptidyl aminopeptidase 2 (prolyl oligopeptidase). Two copies: full length ( <a href="#">REIS_0738</a> ) and split ORF ( <a href="#">REIS_1767</a> , <a href="#">REIS_1768</a> ) flanked by TNP ( <a href="#">REIS_1766</a> ) and NtrY ( <a href="#">REIS_1769</a> ).                                                                                     |
| TlyA           | Hemolysin A. Full length ( <a href="#">REIS_1734</a> ).                                                                                                                                                                                                                                                                                                     |
| TlyC           | Hemolysin C. Full length ( <a href="#">REIS_0496</a> ).                                                                                                                                                                                                                                                                                                     |
| <b>RickA</b>   | Actin tail polymerization. Split with the majority of the ORF ( <a href="#">REIS_1104</a> ) flanked by TNP ( <a href="#">REIS_1103</a> ) and MraY ( <a href="#">REIS_1105</a> ); C-terminal region is duplicated by recombination event ( <a href="#">REIS_0633</a> , <a href="#">REIS_1688</a> ). <u>See <a href="#">Fig. S5</a></u> .                     |
| <b>RalF</b>    | Putative guanine nucleotide exchange protein. Like other SFG rickettsiae, lacks Sec7 domain and contains only C-terminal "tail" ( <a href="#">REIS_0937</a> ), which is flanked by TNP ( <a href="#">REIS_0936</a> ) and malate acetyltransferase ( <a href="#">REIS_0938</a> ).                                                                            |

|               |                                                                                                                                                                                                                                                                                                                                                                                                                                                                                                                                                                                                                                                                                                                                                                                                                                                                                                                                                                                                                                                                                                                                                                                                                                                                                                                                                          |
|---------------|----------------------------------------------------------------------------------------------------------------------------------------------------------------------------------------------------------------------------------------------------------------------------------------------------------------------------------------------------------------------------------------------------------------------------------------------------------------------------------------------------------------------------------------------------------------------------------------------------------------------------------------------------------------------------------------------------------------------------------------------------------------------------------------------------------------------------------------------------------------------------------------------------------------------------------------------------------------------------------------------------------------------------------------------------------------------------------------------------------------------------------------------------------------------------------------------------------------------------------------------------------------------------------------------------------------------------------------------------------|
| GpsA          | Glycerol-3-phosphate dehydrogenase. Frameshift ( <a href="#">REIS_0728</a> ) flanked by TNP ( <a href="#">REIS_0727</a> ) and ribonuclease J 1 ( <a href="#">REIS_0729</a> ). Likely recombination between <a href="#">REIS_0727</a> and <a href="#">REIS_1146</a> (TNP) as <a href="#">REIS_1145</a> (auxin efflux carrier) flanks GpsA in all other <i>Rickettsia</i> genomes. <a href="#">REIS_1145</a> is truncated by gap (G57) supporting the probable recombination event. <u>Conservation of <i>gpsA</i> across <i>Rickettsia</i> genomes is shown in <a href="#">Fig S6A</a>.</u>                                                                                                                                                                                                                                                                                                                                                                                                                                                                                                                                                                                                                                                                                                                                                               |
| GlpT          | Glycerol-3-phosphate transporter. Full length ( <a href="#">REIS_0397</a> ). A second ORF ( <a href="#">REIS_1488</a> ) is slightly truncated (312 aa) due to gap (G79) and present within the RAGE-A insert ( <a href="#">Fig. RA</a> ). <u>Estimated phylogeny of GlpT transporters is shown in <a href="#">Fig. S2</a>.</u>                                                                                                                                                                                                                                                                                                                                                                                                                                                                                                                                                                                                                                                                                                                                                                                                                                                                                                                                                                                                                           |
| MetK          | S-adenosylmethionine synthase. Pseudogene ( <a href="#">REIS_0094</a> ) flanked by conserved hypothetical protein ( <a href="#">REIS_0093</a> ) and HicB ( <a href="#">REIS_0095</a> ).                                                                                                                                                                                                                                                                                                                                                                                                                                                                                                                                                                                                                                                                                                                                                                                                                                                                                                                                                                                                                                                                                                                                                                  |
| EamA          | S-adenosylmethionine (SAM) transporter. Full length ( <a href="#">REIS_0437</a> )<br><u>Estimated phylogeny of EamA transporters is shown in <a href="#">Fig. S2</a>.</u>                                                                                                                                                                                                                                                                                                                                                                                                                                                                                                                                                                                                                                                                                                                                                                                                                                                                                                                                                                                                                                                                                                                                                                                |
| Tlc           | ATP/ADP translocase. Tlc1 full length ( <a href="#">REIS_0396</a> ), Tlc3 full length ( <a href="#">REIS_0804</a> ), Tlc4 full length ( <a href="#">REIS_1190</a> ), and Tlc5 full length ( <a href="#">REIS_0531</a> ). Tlc2 full length ( <a href="#">REIS_0396</a> ) with a second full-length copy ( <a href="#">REIS_1498</a> ) found within the RAGE-A insert ( <a href="#">Fig. RA</a> ). This latter region is duplicated and recombined, yielding a fragmented Tlc2 ( <a href="#">REIS_0285</a> , 188 aa).<br><u>Estimated phylogeny of Tlc translocases is shown in <a href="#">Fig. S11</a>.</u>                                                                                                                                                                                                                                                                                                                                                                                                                                                                                                                                                                                                                                                                                                                                              |
| InvA          | Dinucleoside polyphosphate hydrolase. Full length ( <a href="#">REIS_1328</a> ).                                                                                                                                                                                                                                                                                                                                                                                                                                                                                                                                                                                                                                                                                                                                                                                                                                                                                                                                                                                                                                                                                                                                                                                                                                                                         |
| SodB          | Superoxide dismutase. Full length ( <a href="#">REIS_1227</a> ).                                                                                                                                                                                                                                                                                                                                                                                                                                                                                                                                                                                                                                                                                                                                                                                                                                                                                                                                                                                                                                                                                                                                                                                                                                                                                         |
| ProP          | Proline/betaine transporter. Seven major groups in <i>Rickettsia</i> spp. (Prop1-7). ProP6 absent. ProP1 ( <a href="#">REIS_0438</a> ), ProP2 ( <a href="#">REIS_1056</a> ), Prop3 ( <a href="#">REIS_0282</a> , with RPE3), and ProP7 ( <a href="#">REIS_0013</a> ) full length. ProP4 ( <a href="#">REIS_1965</a> ) full length with two duplicated small fragments ( <a href="#">REIS_1027</a> , <a href="#">REIS_1074</a> ). ProP5 ( <a href="#">REIS_0131</a> ) full length with a truncated copy ( <a href="#">REIS_0189</a> , 120 aa) in a duplicated region (coordinates 93946-101518); a second full length ProP5 ( <a href="#">REIS_1484</a> ) is associated with RAGE-A ( <a href="#">Fig. 5</a> , <a href="#">Fig. 6</a> ). A frameshift ( <a href="#">REIS_0539</a> , <a href="#">REIS_0541</a> ) is recombined with ProP transporters encoded on two separate regions of pREIS4, all of which are associated with an integrase ( <a href="#">REIS_0538</a> ), a SpoT hydrolase ( <a href="#">REIS_0540</a> ), and a SAM-methyltransferase ( <a href="#">REIS_0542</a> ). A separate pseudogene ( <a href="#">REIS_0657</a> ) is also associated with an integrase ( <a href="#">REIS_0658</a> ) and is flanked by TNP ( <a href="#">REIS_0656</a> ). <u>Estimated phylogeny of ProP transporters is shown in <a href="#">Fig. S13</a>.</u> |
| ProQ          | Proline/betaine transporter regulator. Found only in REIS. Two full length ORFs on pREIS1 ( <a href="#">REIS_2104</a> , <a href="#">REIS_2149</a> ) and one full length ORF on pREIS3 ( <a href="#">REIS_2252</a> ).                                                                                                                                                                                                                                                                                                                                                                                                                                                                                                                                                                                                                                                                                                                                                                                                                                                                                                                                                                                                                                                                                                                                     |
| SpoT/<br>RelA | Stringent response regulators; (p)ppGpp hydrolase domain-containing proteins of varying length: <a href="#">REIS_0540</a> (244 aa), <a href="#">REIS_0867</a> (248 aa, RAGE-Be), <a href="#">REIS_1055</a> (235 aa), <a href="#">REIS_1079</a> (103 aa), <a href="#">REIS_1482</a> (240 aa, RAGE-                                                                                                                                                                                                                                                                                                                                                                                                                                                                                                                                                                                                                                                                                                                                                                                                                                                                                                                                                                                                                                                        |

A), [REIS\\_1557](#) (217 aa), [REIS\\_1799](#) (151 aa), [REIS\\_2099](#) (54 aa) + [REIS\\_2100](#) (155 aa), [REIS\\_2260](#) (197aa, pREIS3). Two ORFs within a duplicated region of pREIS4, [ORF10326](#) (122 aa) and [ORF10359](#) (245 aa) is recombined with a region on the chromosome (coords. 427259-430984). (p)ppGpp synthetase domain-containing proteins of varying length: [REIS\\_0058](#) (201 aa), [REIS\\_0864](#) (215 aa, RAGE-Be), [REIS\\_1891](#) (139 aa). Compilation of SpoT/RelA ORFs in *Rickettsia* genomes is shown in [Fig. S12](#).

- Ndk Nucleoside diphosphate kinase. Full length ([REIS\\_0398](#)).
- GppA Guanosine pentaphosphate phosphohydrolase. Frameshift ([REIS\\_1246](#)) flanked by RvhB1 ([REIS\\_1245](#), truncated) and RvhD4 ([REIS\\_1247](#), frameshift).
- AmpG Peptidoglycan import. AmpG1 full length ([REIS\\_0806](#)), AmpG2 full length ([REIS\\_0045](#)), AmpG3 full length ([REIS\\_0267](#)) with four duplicated fragments ([REIS\\_0692](#), [REIS\\_1267](#), [REIS\\_1439](#), [REIS\\_2059](#)), AmpG4 absent. Estimated phylogeny of AmpG transporters is shown in [Fig. S14](#).
- ANK Ankyrin repeat-domain containing proteins (ANKs) of varying length: [REIS\\_0667](#) (116 aa) + [REIS\\_0669](#) (101 aa), [REIS\\_1102](#) (238 aa), [REIS\\_1344](#) (584 aa), [REIS\\_1695](#) (68 aa), [REIS\\_1777](#) (123 aa) + [REIS\\_1778](#) (73 aa), [REIS\\_1920](#) (51 aa), [REIS\\_1955](#) (38 aa) + [REIS\\_1957](#) (42 aa), [REIS\\_2011](#) (189 aa), [REIS\\_2045](#) (147 aa). NOTE: None of the ANKs are homologous with those present within the RAGE of *O. tsutsugamushi*, rather they are similar to the ANKs that are overrepresented in the *R. bellii* and *R. felis* genomes.
- LPS Lipopolysaccharide biosynthesis; Wzt (RfbB) ([REIS\\_0020](#)), Wzm (RfbA) ([REIS\\_0021](#)), LpxD ([REIS\\_0029](#)), LpxL ([REIS\\_0064](#)), LpxK ([REIS\\_0065](#)), LpxB ([REIS\\_1040](#)), LpxC ([REIS\\_1297](#)), WaaA ([REIS\\_2012](#)) full length. LpxA ([REIS\\_0026](#)) truncated by gap (G30). RfaG (TG-specific WaaG-like sugar transferase, MtfB-like), RfaG (TG-specific WaaG-like sugar transferase, WavL-like), and RfaJ (TG-specific WaaJ-like sugar transferase, A4GalT-like) are absent.
- rvh T4SS Rickettsiales *vir* homolog (rvh) P-like T4SS. Note: There are no known homologs to VirB5 in the *rvh* T4SS. RvhB2 ([REIS\\_1676](#)), RvhB3 ([REIS\\_2293](#)), RvhB4a ([REIS\\_2293](#)), RvhB4b ([REIS\\_0264](#)), RvhB6d ([REIS\\_0606](#)), RvhB7 ([REIS\\_1250](#)), RvhB8a ([REIS\\_1251](#)), RvhB8b ([REIS\\_1249](#)), and RvhB9a ([REIS\\_1252](#)) are full length. RvhB11 was not assembled due to gap (G68) but was found complete in the WGS reads. RvhB1 ([REIS\\_2293](#)) is a frameshift. RvhB6a ([REIS\\_0602](#) + [REIS\\_0603](#)) is a split gene. RvhB6b ([REIS\\_0604](#)) and RvhB6c ([REIS\\_0605](#)) are truncated. RvhB6e ([REIS\\_0607](#)) is a frameshift. RvhB9b ([REIS\\_1248](#)) is truncated. RvhB10 absent but partially detected in *I. scapularis* genome data (gcontig\_1108379345628). RvhD4 ([REIS\\_1247](#) + [REIS\\_2294](#)) is split by gap (G67).
- BarA Histidine kinase sensor protein. Full length ([REIS\\_1341](#)).

|      |                                                                                                   |
|------|---------------------------------------------------------------------------------------------------|
| PhoR | Histidine kinase phosphatase synthesis sensor protein. Full length ( <a href="#">REIS_0144</a> ). |
| CzcR | Transcriptional activator protein. Full length ( <a href="#">REIS_0432</a> ).                     |
| EnvZ | Histidine kinase osmolarity sensor protein. Full length ( <a href="#">REIS_0748</a> ).            |
| OmpR | Transcriptional activator protein. Full length ( <a href="#">REIS_0747</a> ).                     |
| NtrY | Histidine kinase nitrogen sensor protein. Full length ( <a href="#">REIS_1769</a> ).              |
| NtrX | Nitrogen assimilation regulatory protein. Full length ( <a href="#">REIS_1404</a> ).              |

<sup>A</sup> Red indicates probable pseudogenes.

<sup>B</sup> HP = hypothetical protein, TNP = transposase and inactive derivatives,

**Table S10.** Genes encoded within the RAGE-A piggyback region that are typical of aminoglycoside antibiotic resistance and biosynthesis gene clusters.

| REIS ORF | Top 5 Blastp subjects<br>Taxon                          | Accession no. | Phyl <sup>A</sup> | Gene <sup>B</sup> | Score | Expect |
|----------|---------------------------------------------------------|---------------|-------------------|-------------------|-------|--------|
| 1491     | <i>Streptomyces tenjimariensis</i>                      | CAI59977      | Act               | IstN              | 131   | 1e-28  |
|          | <i>Micromonospora olivasterospora</i>                   | CAF31551      | Act               | ForN              | 116   | 2e-24  |
|          | <i>Frankia</i> sp. Ccl3                                 | YP_482457     | Act               | SAM-MT            | 100   | 1e-19  |
|          | <i>Trichodesmium erythraeum</i>                         | YP_721874     | Cya               | SAM-MT            | 82.0  | 7e-14  |
|          | <i>Synechococcus</i> sp. CC9902                         | YP_377481     | Cya               | SAM-MT            | 55.5  | 6e-06  |
| 1492     | <i>Streptomyces tenjimariensis</i>                      | CAI59979      | Act               | IstM              | 319   | 5e-85  |
|          | <i>Streptomyces lividus</i>                             | CAG38698      | Act               | LivM              | 224   | 2e-56  |
|          | <i>Streptomyces fradiae</i>                             | BAD95821      | Act               | NeoD              | 222   | 7e-56  |
|          | <i>Streptomyces fradiae</i>                             | CAF33313      | Act               | NeoM              | 220   | 2e-55  |
|          | <i>Streptomyces kanamyceticus</i>                       | BAD20768      | Act               | GT-1              | 220   | 3e-55  |
| 1493     | <i>Bacillus circulans</i>                               | Q8G8Y2        | Fir               | BtrR              | 206   | 5e-51  |
|          | <i>Streptomyces</i> sp. C                               | ZP_07291433   | Act               | StsC              | 201   | 2e-49  |
|          | <i>Streptomyces</i> sp. ACT-1                           | ZP_06281476   | Act               | StsC              | 197   | 3e-48  |
|          | <i>Streptomyces platensis</i>                           | ADC52823      | Act               | StsC              | 197   | 3e-48  |
|          | <i>Streptomyces kanamyceticus</i>                       | BAD20758      | Act               | WecE              | 193   | 4e-47  |
| 1495     | <i>Streptomyces</i> sp. DSM 40477                       | CAF33032      | Act               | AprU              | 68.9  | 7e-10  |
|          | <i>Bacillus cereus</i> AH1273                           | ZP_04174987   | Fir               | PKc_like          | 59.3  | 7e-07  |
|          | <i>Streptoalloteichus hindustanus</i>                   | CAI47639      | Act               | AprU              | 56.6  | 4e-06  |
|          | <i>Bacillus weihenstephanensis</i>                      | YP_001645433  | Fir               | PKc_like          | 54.3  | 2e-05  |
|          | <i>Clostridium butyricum</i> E4                         | ZP_04525810   | Fir               | PKc_like          | 52.0  | 1e-04  |
| 1496     | REIS (REIS_0288)                                        | ZP_04698620   | Alp               | HemL              | 899   | 0.0    |
|          | <i>Streptomyces kanamyceticus</i>                       | BAD20756      | Act               | HemL              | 239   | 7e-61  |
|          | <i>Micromonospora olivasterospora</i>                   | CAF31546      | Act               | ForB              | 238   | 1e-60  |
|          | <i>Micromonospora echinospora</i>                       | CAF31437      | Act               | GenB4             | 236   | 6e-60  |
|          | <i>Frankia</i> sp. Ccl3                                 | YP_482453     | Act               | HemL              | 234   | 1e-59  |
| 1500     | <i>Streptomyces tenjimariensis</i>                      | CAH60159      | Act               | IstC              | 269   | 4e-70  |
|          | <i>Streptoalloteichus hindustanus</i>                   | BAE98082      | Act               | AlloH             | 263   | 3e-68  |
|          | <i>Acetivibrio cellulolyticus</i> CD2                   | ZP_07327975   | Fir               | DHQ_s             | 263   | 3e-68  |
|          | <i>Streptomyces</i> sp. KCTC 9047                       | ACR82896      | Act               | AmgC              | 257   | 2e-66  |
|          | <i>Streptoalloteichus hindustanus</i>                   | CAI47651      | Act               | AprC              | 255   | 6e-66  |
| 1501     | <i>Micromonospora inyonensis</i>                        | ACN38356      | Act               | Tdh               | 157   | 2e-36  |
|          | <i>Micromonospora inyonensis</i>                        | ABX38722      | Act               | Tdh               | 156   | 2e-36  |
|          | <i>Micromonospora echinospora</i>                       | CAF34032      | Act               | GacH              | 155   | 7e-36  |
|          | <i>Streptomyces tenebrarius</i>                         | CAE22477      | Act               | TacD              | 154   | 1e-35  |
|          | <i>Streptomyces rimosus</i> subsp. <i>paromomycinus</i> | CAF32372      | Act               | ParE              | 154   | 2e-35  |
| 1502     | <i>Micromonospora inyonensis</i>                        | ACN38340      | Act               | BetA              | 439   | 3e-121 |
|          | <i>Streptomyces rimosus</i> subsp. <i>paromomycinus</i> | CAF32378      | Act               | ParQ              | 424   | 1e-116 |
|          | <i>Streptomyces lividus</i>                             | CAG38701      | Act               | LivQ              | 416   | 3e-114 |
|          | <i>Micromonospora echinospora</i>                       | CAF34042      | Act               | GacJ              | 409   | 4e-112 |
|          | <i>Streptomyces fradiae</i>                             | BAD95824      | Act               | NeoG              | 408   | 8e-112 |
| 1503     | <i>Micromonospora inyonensis</i>                        | ACN38339      | Act               | HemL              | 248   | 1e-63  |
|          | <i>Bacillus circulans</i>                               | BAE07066      | Fir               | BtrB              | 246   | 3e-63  |
|          | <i>Streptomyces ribosidificus</i>                       | CAG34709      | Act               | RbmH              | 241   | 1e-61  |

|      |                                                         |           |     |       |      |       |
|------|---------------------------------------------------------|-----------|-----|-------|------|-------|
|      | <i>Micromonospora echinospora</i>                       | CAF34043  | Act | GacK  | 238  | 9e-61 |
|      | <i>Streptomyces rimosus</i> subsp. <i>paromomycinus</i> | CAF32385  | Act | ParB  | 234  | 2e-59 |
| 1504 | <i>Streptomyces tenebrarius</i>                         | CAE22472  | Act | TbmB  | 321  | 9e-86 |
|      | <i>Bacillus circulans</i>                               | Q8G8Y2    | Fir | BtrR  | 206  | 5e-51 |
|      | <i>Streptomyces</i> sp. DSM 40477                       | CAF33048  | Act | AprS  | 318  | 9e-85 |
|      | <i>Streptomyces kanamyceticus</i>                       | BAD20758  | Act | WecE  | 317  | 3e-84 |
|      | <i>Pseudomonas entomophila</i> L48                      | YP_608081 | Gam | WecE  | 313  | 2e-83 |
| 1505 | <i>Pseudomonas entomophila</i> L48                      | YP_608079 | Gam | PIG-L | 101  | 8e-20 |
|      | <i>Streptomyces rimosus</i> subsp. <i>paromomycinus</i> | CAF32383  | Act | ParD  | 100  | 2e-19 |
|      | <i>Streptomyces</i> sp. DSM 40477                       | CAH18559  | Act | TobN  | 96.7 | 2e-18 |
|      | <i>Streptomyces lividus</i>                             | CAG38705  | Act | LivD  | 94.7 | 8e-18 |
|      | <i>Streptomyces tenjimariensis</i>                      | CAH60149  | Act | IstD  | 94.7 | 8e-18 |

<sup>A</sup> Major phylogenetic group: Act, Actinobacteria; Cya, Cyanobacteria; Fir, Firmicutes; Alp, *Alphaproteobacteria*; Gam, *Gammaproteobacteria*.

<sup>B</sup> Annotation of top hits (used in Fig. 6): IstN, methyltransferase; IstM, putative NDP-D-glucosaminyltransferase; Btr, L-glutamine:2-deoxy-scylo-inosose aminotransferase; AprU, putative kinase; HemL, glutamate-1-semialdehyde 2,1-aminomutase 1; IstC, 2-deoxy-scylo-inosose synthase; Tdh, 2-deoxy-scylo-inosamine dehydrogenase; BetA (Sis6), putative sugar-alcohol dehydrogenase; HemL, glutamate-1-semialdehyde 2,1-aminomutase 1; TbmB (KanB), L-glutamine:2-deoxy-scylo-inosose aminotransferase; PIG-L, putative amidase, AGA deacetylase.

**Table S11.** REIS genes with highly similar homologs in the “*Candidatus Amoebophilus asiaticus*” genome, and their distribution in other *Rickettsia* genomes.

| Gene <sup>A</sup> | Aasi <sup>B</sup> |                                                                     | REIS <sup>C</sup> |                                                                | Dist. <sup>D</sup> |
|-------------------|-------------------|---------------------------------------------------------------------|-------------------|----------------------------------------------------------------|--------------------|
|                   | ORF               | Top hit                                                             | ORF               | Top hit                                                        |                    |
| AlkD              | 0285              | <i>Rickettsia bellii</i> RML369-C (5e-75)                           | -----             |                                                                | D                  |
| AmpD              | 0795              | <i>Orientia tsutsugamushi</i> str. Boryong (5e-66)                  | -----             |                                                                | D                  |
| AraC_E            | 1875              | <i>Rickettsia bellii</i> RML369-C (5e-45)                           | -----             |                                                                | D                  |
| RhIE              | 1916              | <i>Wolbachia (Culex quinquefasciatus Pel)</i> (1e-123)              | 0046              | <i>Candidatus Amoebophilus asiaticus</i> 5a2 (3e-99)           | R                  |
| FabH              | 0115              | <i>Streptomyces avermitilis</i> MA-4680 (32e-74)                    | 0100              | <i>Candidatus Puniceispirillum marinum</i> IMCC1322 (9e-92)    | R                  |
| PanF              | 0446              | <i>Orientia tsutsugamushi</i> str. Ikeda (2e-57)                    | 0144              | <i>Candidatus Amoebophilus asiaticus</i> 5a2 (6e-121)          | D                  |
| ISRpe1            | 0884              | <i>Rickettsia</i> endosymbiont of <i>Ixodes scapularis</i> (5e-169) | 0170              | <i>Candidatus Amoebophilus asiaticus</i> 5a2 (2e-172)          | D                  |
| EamA              | 1859              | <i>Rickettsia typhi</i> str. Wilmington (2e-68)                     | 0437              | <i>Candidatus Amoebophilus asiaticus</i> 5a2 (1e-65)           | R                  |
| HP                | 0297              | <i>Rickettsia akari</i> str. Hartford (5e-19)                       | 0637-0640         | <i>Candidatus Amoebophilus asiaticus</i> 5a2 (1e-16)           | D                  |
| HP                | 0973              | <i>Rickettsia bellii</i> RML369-C (3e-68)                           | 0995              | <i>Candidatus Amoebophilus asiaticus</i> 5a2 (1e-49)           | D                  |
| SpIB              | 1237              | <i>Rickettsia felis</i> URRWXCa2 (1e-130)                           | 0998              | <i>Candidatus Amoebophilus asiaticus</i> 5a2 (3e-55)           | D                  |
| ProP              | 1183              | <i>Rickettsia canadensis</i> str. McKiel (1e-118)                   | 1056              | <i>Candidatus Amoebophilus asiaticus</i> 5a2 (5e-101)          | P                  |
| TypA              | 0730              | <i>Wolbachia (Culex quinquefasciatus Pel)</i> (0.0)                 | 1285              | <i>Magnetospirillum magnetotacticum</i> MS-1 (0.0)             | D                  |
| PilT              | 1214              | <i>Rickettsia bellii</i> RML369-C (8e-40)                           | 1287              | <i>Thioalkalivibrio</i> sp. HL-EbGR7 (2e-27)                   | D                  |
| MdIB              | 0731              | <i>Legionella longbeachae</i> NSW150 (1e-150)                       | 1370              | <i>Parachlamydia acanthamoebae</i> str. Hall's coccus (1e-123) | R                  |

| Gene <sup>A</sup> | Aasi <sup>B</sup> |                                                                | REIS <sup>C</sup> |                                                                | Dist. <sup>D</sup> |
|-------------------|-------------------|----------------------------------------------------------------|-------------------|----------------------------------------------------------------|--------------------|
|                   | ORF               | Top hit                                                        | ORF               | Top hit                                                        |                    |
| HP                | 0712              | <i>Parachlamydia acanthamoebae</i> str. Hall's coccus (3e-17)  | 1420              | <i>Parachlamydia acanthamoebae</i> str. Hall's coccus (6e-12)  | R                  |
| Taq               | 0861              | <i>Rickettsia akari</i> str. Hartford (8e-155)                 | 1530              | Candidatus <i>Amoebophilus asiaticus</i> 5a2 (2e-152)          | D                  |
| F-box             | 0025              | <i>Nematostella vectensis</i> (2e-11)                          | 1559              | Candidatus <i>Amoebophilus asiaticus</i> 5a2 (2e-59)           | D                  |
| HtrA              | 0325              | <i>Rickettsia typhi</i> str. Wilmington (3e-104)               | 1710              | Candidatus <i>Amoebophilus asiaticus</i> 5a2 (2e-98)           | D                  |
| Antitoxin         | 1215              | <i>Rickettsia bellii</i> OSU 85-389 (2e-21)                    | 1775              | Candidatus <i>Amoebophilus asiaticus</i> 5a2 (6e-05)           | D                  |
| MdIB              | 0674              | <i>Parachlamydia acanthamoebae</i> str. Hall's coccus (7e-126) | 2217              | <i>Parachlamydia acanthamoebae</i> str. Hall's coccus (2e-122) | R                  |

<sup>A</sup> Genes identified as highly homologous across *Rickettsia* genomes and “*Candidatus Amoebophilus asiaticus*”, either here or previously (1).

<sup>B</sup> “*Candidatus Amoebophilus asiaticus*” ORF number and top blastp hit.

<sup>C</sup> Complementary REIS ORF number (if present) and top blastp hit.

<sup>D</sup> Distribution in other *Rickettsia* genomes: R, conserved; D, patchy; P, proliferated.

1. **Schmitz-Esser, S., P. Tischler, R. Arnold, J. Montanaro, M. Wagner, T. Rattei, and M. Horn.** 2010. The genome of the amoeba symbiont “*Candidatus Amoebophilus asiaticus*” reveals common mechanisms for host cell interaction among amoeba-associated bacteria. *J Bacteriol* **192**:1045-1057.
